# Supplementary material for: Concentrations, ratios, and sinking fluxes of major bioelements at Ocean Station Papa
Source: Oxford University Press journal article supplement (doi:10.1525/elementa.2020.00166), 2021-01-01
Supplement: roca-marti_et_al_table_s3.xlsx [file roca-marti_et_al_table_s3.xlsx]

## Sheet: Table S3
Table S3	Thorium-234 (234Th), particulate organic carbon (POC), particulate nitrogen (PN), total particulate phosphorus (TPP), biogenic silica (bSi), and particulate inorganic carbon (PIC) fluxes for each cast and depth
										1D SS model
Internala	Bottle	Station	CTD#	Epoch	Latitude (ºN)	Longitude (ºE)	CTD	Collection	Time	234Th flux @zb	Uncert	POC/234Thc	SD	POC fluxd	Uncert	PN/234Thc	SD	PN fluxd	Uncert	TPP/234Thc	SD	TPP fluxd	Uncert	bSi/234Thc	SD	bSi fluxd	Uncert	PIC/234Thc	SD	PIC fluxd	Uncert
SR#	depth	#					Niskin	date		dpm m–2 d–1		μmol dpm–1		mmol C m–2 d–1		μmol dpm–1		mmol N m–2 d–1		μmol dpm–1		mmol P m–2 d–1		μmol dpm–1		mmol Si m–2 d–1		μmol dpm–1		mmol C m–2 d–1
6	5.241	SS1	1	1	50.086	-145.05	14	2018-08-14 08:04:00	2018-08-14 08:04:00	299.321	25.941	5.30452	1.89986	1.58776	0.58508	0.798586	0.358632	0.239034	0.109327	0.184484	0.077162	0.0552201	0.0235868	0.784293	0.237113	0.234755	0.0738315	0.0452341	0.0163078	0.0135395	0.00502033
7	20.796	SS1	1	1	50.086	-145.05	13	2018-08-14 08:04:00	2018-08-14 08:04:00	732.414	37.0145	5.30452	1.89986	3.88511	1.40527	0.798586	0.358632	0.584896	0.264325	0.184484	0.077162	0.135119	0.0569256	0.784293	0.237113	0.574427	0.176075	0.0452341	0.0163078	0.0331301	0.0120609
8	34.249	SS1	1	1	50.086	-145.05	12	2018-08-14 08:04:00	2018-08-14 08:04:00	999.385	49.1583	5.30452	1.89986	5.30126	1.91651	0.798586	0.358632	0.798095	0.360555	0.184484	0.077162	0.184371	0.0776459	0.784293	0.237113	0.78381	0.240083	0.0452341	0.0163078	0.0452062	0.0164488
9	48.487	SS1	1	1	50.086	-145.05	11	2018-08-14 08:04:00	2018-08-14 08:04:00	1207.75	61.8174	5.30452	1.89986	6.40654	2.31787	0.798586	0.358632	0.964493	0.435942	0.184484	0.077162	0.222811	0.0938876	0.784293	0.237113	0.947231	0.290449	0.0452341	0.0163078	0.0546315	0.0198933
10	63.323	SS1	1	1	50.086	-145.05	10	2018-08-14 08:04:00	2018-08-14 08:04:00	1351.7	72.5116	4.32199	1.32292	5.84205	1.81545	0.647718	0.240774	0.875521	0.328826	0.142766	0.0506698	0.192978	0.0692684	0.73054	0.212667	0.987472	0.292302	0.0452341	0.0163078	0.0611429	0.022286
11	79.133	SS1	1	1	50.086	-145.05	9	2018-08-14 08:04:00	2018-08-14 08:04:00	1342.7	87.465	3.1568	0.771171	4.23865	1.07164	0.467484	0.130909	0.627692	0.180465	0.0921744	0.0260105	0.123763	0.0358429	0.668881	0.1852	0.89811	0.255458	0.0452341	0.0163078	0.060736	0.0222511
12	98.396	SS1	1	1	50.086	-145.05	8	2018-08-14 08:04:00	2018-08-14 08:04:00	1276.47	97.6816	1.73711	0.293555	2.21737	0.411343	0.247886	0.0417199	0.316418	0.0585006	0.0305328	0.00591049	0.0389742	0.00811268	0.593756	0.154105	0.75791	0.205083	0.0452341	0.0163078	0.0577398	0.0212802
13	108.366	SS1	1	1	50.086	-145.05	7	2018-08-14 08:04:00	2018-08-14 08:04:00	1174.41	105.99	1.532	0.273549	1.7992	0.359962	0.206331	0.0335556	0.242317	0.0450692	0.0191902	0.00427905	0.0225371	0.00542136	0.579424	0.162263	0.680481	0.200214	0.0452341	0.0163078	0.0531233	0.019743
14	122.679	SS1	1	1	50.086	-145.05	6	2018-08-14 08:04:00	2018-08-14 08:04:00	1137.93	122.014	1.38744	0.285408	1.57881	0.366246	0.176274	0.0309381	0.200587	0.0412553	0.0148963	0.00406783	0.0169509	0.00497294	0.560817	0.175514	0.638169	0.211119	0.0452341	0.0163078	0.051473	0.0193605
15	149.476	SS1	1	1	50.086	-145.05	5	2018-08-14 08:04:00	2018-08-14 08:04:00	1304.71	161.618	1.11679	0.286504	1.45709	0.4151	0.12	0.0239555	0.156566	0.0367832	0.00948847	0.00344978	0.0123797	0.00475502	0.525981	0.19703	0.686253	0.270758	0.0452341	0.0163078	0.0590173	0.0224979
16	198.334	SS1	1	1	50.086	-145.05	4	2018-08-14 08:04:00	2018-08-14 08:04:00	1260.13	305.198	1.0297	0.067089	1.29756	0.325435	0.125933	0.0157961	0.158693	0.0432832	0.00921166	0.00256452	0.0116079	0.00428337	0.534403	0.203876	0.673418	0.30431	0.0452341	0.0163078	0.0570008	0.0247566
17	333.208	SS1	1	1	50.086	-145.05	3	2018-08-14 08:04:00	2018-08-14 08:04:00	1081.49	528.044	0.928717	0.149057	1.00439	0.516219	0.108357	0.0304902	0.117186	0.0660388	0.00709925	0.000399864	0.00767774	0.00377357	0.521982	0.188324	0.564516	0.342714	0.0452341	0.0163078	0.04892	0.0296913
18	502.94	SS1	1	1	50.086	-145.05	1	2018-08-14 08:04:00	2018-08-14 08:04:00	935.741	582.273	0.876803	0.158282	0.82046	0.531588	0.120949	0.0504373	0.113177	0.0847773	0.00803236	0.00133428	0.00751621	0.00484081	0.802252	0.183303	0.7507	0.497625	0.0452341	0.0163078	0.0423273	0.0304398
19	8.034	SS2	2	1	50.056	-145.279	13	2018-08-14 11:01:00	2018-08-14 11:01:00	484.394	30.2983	5.30452	1.89986	2.56948	0.934211	0.798586	0.358632	0.386831	0.175396	0.184484	0.077162	0.0893632	0.0377925	0.784293	0.237113	0.379907	0.117289	0.0452341	0.0163078	0.0219111	0.00801742
20	22.92	SS2	2	1	50.056	-145.279	12	2018-08-14 11:01:00	2018-08-14 11:01:00	844.002	42.8903	5.30452	1.89986	4.47703	1.61955	0.798586	0.358632	0.674009	0.304618	0.184484	0.077162	0.155705	0.0656038	0.784293	0.237113	0.661945	0.202931	0.0452341	0.0163078	0.0381777	0.0138999
21	37.331	SS2	2	1	50.056	-145.279	11	2018-08-14 11:01:00	2018-08-14 11:01:00	1245.17	53.597	5.30452	1.89986	6.60505	2.38268	0.798586	0.358632	0.994378	0.448605	0.184484	0.077162	0.229715	0.0965874	0.784293	0.237113	0.97658	0.298224	0.0452341	0.0163078	0.0563242	0.0204503
22	53.028	SS2	2	1	50.056	-145.279	10	2018-08-14 11:01:00	2018-08-14 11:01:00	1566.49	61.6505	5.08074	1.75963	7.9589	2.77418	0.765081	0.330085	1.19849	0.51922	0.17571	0.0706832	0.275248	0.111253	0.770691	0.231496	1.20728	0.365735	0.0452341	0.0163078	0.0708585	0.0256977
23	68.12	SS2	2	1	50.056	-145.279	9	2018-08-14 11:01:00	2018-08-14 11:01:00	1699.04	70.1815	3.96846	1.14029	6.74258	1.95732	0.593032	0.203946	1.00759	0.349004	0.127416	0.0424102	0.216485	0.0726095	0.711832	0.204148	1.20943	0.350435	0.0452341	0.0163078	0.0768546	0.027889
24	82.238	SS2	2	1	50.056	-145.279	8	2018-08-14 11:01:00	2018-08-14 11:01:00	1875.02	78.61	2.92796	0.679731	5.48998	1.29513	0.432087	0.113215	0.810172	0.214981	0.0822384	0.0220321	0.154199	0.0418134	0.656772	0.180012	1.23146	0.341452	0.0452341	0.0163078	0.0848148	0.0307835
25	98.891	SS2	2	1	50.056	-145.279	7	2018-08-14 11:01:00	2018-08-14 11:01:00	1844.05	88.8352	1.70063	0.284099	3.13605	0.545241	0.242243	0.0400747	0.446707	0.0769693	0.0289488	0.00553795	0.053383	0.0105311	0.591825	0.153341	1.09135	0.287614	0.0452341	0.0163078	0.0834138	0.0303397
26	112.643	SS2	2	1	50.056	-145.279	6	2018-08-14 11:01:00	2018-08-14 11:01:00	1722.26	98.4753	1.48881	0.277915	2.56411	0.500593	0.19735	0.0328545	0.339888	0.0598285	0.0179071	0.004261	0.0308407	0.00754746	0.573864	0.166351	0.988345	0.29202	0.0452341	0.0163078	0.0779049	0.0284374
27	127.787	SS2	2	1	50.056	-145.279	5	2018-08-14 11:01:00	2018-08-14 11:01:00	1809.9	110.912	1.33585	0.28774	2.41776	0.541447	0.165547	0.0298164	0.299625	0.057003	0.0133639	0.00388829	0.0241874	0.00719182	0.554177	0.179947	1.00301	0.331436	0.0452341	0.0163078	0.0818693	0.0299389
28	147.545	SS2	2	1	50.056	-145.279	4	2018-08-14 11:01:00	2018-08-14 11:01:00	2034.13	145.281	1.1363	0.287345	2.31137	0.607361	0.124056	0.0245494	0.252344	0.0530894	0.00948847	0.00344978	0.0193007	0.00715139	0.528492	0.195623	1.07502	0.405261	0.0452341	0.0163078	0.0920118	0.0338168
29	198.773	SS2	2	1	50.056	-145.279	3	2018-08-14 11:01:00	2018-08-14 11:01:00	2832.89	303.404	1.02891	0.0652389	2.91478	0.36278	0.125951	0.0157043	0.356805	0.0586476	0.00920859	0.00255638	0.0260869	0.0077622	0.534403	0.203876	1.5139	0.599885	0.0452341	0.0163078	0.128143	0.0481936
30	332.196	SS2	2	1	50.056	-145.279	2	2018-08-14 11:01:00	2018-08-14 11:01:00	1934.03	526.086	0.929122	0.149009	1.79695	0.567428	0.108276	0.0303688	0.209408	0.0818193	0.00709318	0.000395215	0.0137184	0.0038091	0.521982	0.188324	1.00953	0.456146	0.0452341	0.0163078	0.087484	0.0395102
31	502.71	SS2	2	1	50.056	-145.279	1	2018-08-14 11:01:00	2018-08-14 11:01:00	2777.99	567.473	0.876803	0.158282	2.43575	0.664009	0.120949	0.0504373	0.335994	0.156022	0.00803236	0.00133428	0.0223138	0.00587501	0.802252	0.183303	2.22865	0.683051	0.0452341	0.0163078	0.12566	0.0520697
32	7.771	SS3	3	1	50.118	-145.223	13	2018-08-14 13:14:00	2018-08-14 13:14:00	368.47	32.9691	5.30452	1.89986	1.95456	0.721556	0.798586	0.358632	0.294255	0.134742	0.184484	0.077162	0.067977	0.0290752	0.784293	0.237113	0.288988	0.0911151	0.0452341	0.0163078	0.0166674	0.00619124
33	22.613	SS3	3	1	50.118	-145.223	12	2018-08-14 13:14:00	2018-08-14 13:14:00	699.809	45.1944	5.30452	1.89986	3.71215	1.35098	0.798586	0.358632	0.558858	0.253555	0.184484	0.077162	0.129104	0.0546385	0.784293	0.237113	0.548855	0.169677	0.0452341	0.0163078	0.0316552	0.011594
34	37.779	SS3	3	1	50.118	-145.223	11	2018-08-14 13:14:00	2018-08-14 13:14:00	1080.53	55.4696	5.30452	1.89986	5.73169	2.07383	0.798586	0.358632	0.862896	0.390036	0.184484	0.077162	0.199341	0.0840014	0.784293	0.237113	0.847451	0.259875	0.0452341	0.0163078	0.0488767	0.0177988
35	53.056	SS3	3	1	50.118	-145.223	10	2018-08-14 13:14:00	2018-08-14 13:14:00	1360.97	65.698	5.07867	1.75836	6.91194	2.41623	0.764762	0.329823	1.04082	0.451683	0.175621	0.0706246	0.239015	0.0968082	0.770582	0.231444	1.04874	0.319032	0.0452341	0.0163078	0.0615624	0.0223926
36	68.197	SS3	3	1	50.118	-145.223	9	2018-08-14 13:14:00	2018-08-14 13:14:00	1318.32	77.2642	3.96278	1.13747	5.2242	1.53048	0.592154	0.20338	0.780647	0.271995	0.12717	0.0422831	0.16765	0.0566019	0.711532	0.204012	0.938024	0.274514	0.0452341	0.0163078	0.0596328	0.0217811
37	82.853	SS3	3	1	50.118	-145.223	8	2018-08-14 13:14:00	2018-08-14 13:14:00	1313.56	86.844	2.88263	0.662278	3.7865	0.905243	0.425076	0.109862	0.558361	0.148957	0.0802704	0.0212778	0.10544	0.0288058	0.654373	0.178992	0.859556	0.241887	0.0452341	0.0163078	0.0594175	0.0217785
38	97.652	SS3	3	1	50.118	-145.223	7	2018-08-14 13:14:00	2018-08-14 13:14:00	1122.96	100.654	1.79195	0.308033	2.01228	0.390108	0.256367	0.0442537	0.28789	0.0559952	0.0329136	0.00648401	0.0369606	0.00799951	0.596657	0.155258	0.670021	0.184402	0.0452341	0.0163078	0.050796	0.0188705
39	112.377	SS3	3	1	50.118	-145.223	6	2018-08-14 13:14:00	2018-08-14 13:14:00	973.374	111.838	1.49149	0.277664	1.45178	0.317601	0.197908	0.0329001	0.192639	0.0389287	0.0179869	0.00426325	0.017508	0.0046116	0.57421	0.1661	0.558921	0.173964	0.0452341	0.0163078	0.0440296	0.0166602
40	126.918	SS3	3	1	50.118	-145.223	5	2018-08-14 13:14:00	2018-08-14 13:14:00	665.043	128.569	1.34463	0.287414	0.894236	0.257725	0.167372	0.0300142	0.11131	0.0293512	0.0136246	0.0039227	0.00906095	0.00314231	0.555307	0.179204	0.369303	0.138927	0.0452341	0.0163078	0.0300826	0.0123063
41	147.183	SS3	3	1	50.118	-145.223	4	2018-08-14 13:14:00	2018-08-14 13:14:00	527.12	167.454	1.13995	0.287487	0.600892	0.243727	0.124816	0.0246592	0.0657929	0.0246131	0.00948847	0.00344978	0.00500156	0.00241481	0.528962	0.195357	0.278827	0.135831	0.0452341	0.0163078	0.0238438	0.0114573
42	197.062	SS3	3	1	50.118	-145.223	3	2018-08-14 13:14:00	2018-08-14 13:14:00	1357.79	278.018	1.03199	0.0724653	1.40123	0.303314	0.125882	0.0160619	0.170922	0.0412366	0.00922057	0.00258811	0.0125196	0.00434976	0.534403	0.203876	0.725609	0.314172	0.0452341	0.0163078	0.0614185	0.0254647
43	331.412	SS3	3	1	50.118	-145.223	2	2018-08-14 13:14:00	2018-08-14 13:14:00	1955.2	477.557	0.929435	0.148971	1.81723	0.530892	0.108213	0.0302748	0.211578	0.0785776	0.00708847	0.000391618	0.0138594	0.00347066	0.521982	0.188324	1.02058	0.444655	0.0452341	0.0163078	0.0884416	0.0385136
44	500.307	SS3	3	1	50.118	-145.223	1	2018-08-14 13:14:00	2018-08-14 13:14:00	2218.05	535.241	0.876803	0.158282	1.94479	0.586087	0.120949	0.0504373	0.26827	0.129253	0.00803236	0.00133428	0.0178162	0.0052194	0.802252	0.183303	1.77943	0.591343	0.0452341	0.0163078	0.100331	0.0435265
55	4.704	SS4	4	1	50.18	-145.167	23	2018-08-14 16:01:00	2018-08-14 16:01:00	184.68	21.0285	5.30452	1.89986	0.979641	0.368171	0.798586	0.358632	0.147483	0.068328	0.184484	0.077162	0.0340706	0.0147689	0.784293	0.237113	0.144843	0.0467929	0.0452341	0.0163078	0.00835384	0.00315837
54	15.165	SS4	4	1	50.18	-145.167	19	2018-08-14 16:01:00	2018-08-14 16:01:00	415.947	29.7161	5.30452	1.89986	2.2064	0.805809	0.798586	0.358632	0.332169	0.151048	0.184484	0.077162	0.0767357	0.0325601	0.784293	0.237113	0.326224	0.101343	0.0452341	0.0163078	0.018815	0.00691509
53	25.207	SS4	4	1	50.18	-145.167	16	2018-08-14 16:01:00	2018-08-14 16:01:00	803.885	46.2951	5.30452	1.89986	4.26423	1.54689	0.798586	0.358632	0.641971	0.290659	0.184484	0.077162	0.148304	0.0626145	0.784293	0.237113	0.630481	0.194039	0.0452341	0.0163078	0.036363	0.0132758
52	50.221	SS4	4	1	50.18	-145.167	13	2018-08-14 16:01:00	2018-08-14 16:01:00	1283.72	67.403	5.30452	1.89986	6.80954	2.46496	0.798586	0.358632	1.02516	0.46352	0.184484	0.077162	0.236827	0.0998321	0.784293	0.237113	1.00682	0.308944	0.0452341	0.0163078	0.058068	0.0211556
51	74.68	SS4	4	1	50.18	-145.167	11	2018-08-14 16:01:00	2018-08-14 16:01:00	1083.73	94.1334	3.48498	0.912006	3.77677	1.04139	0.518248	0.158509	0.561639	0.178574	0.106424	0.0322116	0.115334	0.0363176	0.686248	0.192759	0.743705	0.218658	0.0452341	0.0163078	0.0490213	0.0181789
50	95.621	SS4	4	1	50.18	-145.167	9	2018-08-14 16:01:00	2018-08-14 16:01:00	1133.77	104.444	1.94163	0.349178	2.20137	0.444806	0.279521	0.0515431	0.316912	0.0653247	0.0394128	0.00813257	0.0446851	0.0100976	0.604578	0.158424	0.685453	0.190393	0.0452341	0.0163078	0.051285	0.0190834
49	109.715	SS4	4	1	50.18	-145.167	7	2018-08-14 16:01:00	2018-08-14 16:01:00	1018.1	114.844	1.51838	0.275002	1.54586	0.329842	0.203499	0.0333419	0.207182	0.0412126	0.0187855	0.00427751	0.0191255	0.00486002	0.577671	0.163564	0.588127	0.179253	0.0452341	0.0163078	0.0460528	0.0173967
48	125.695	SS4	4	1	50.18	-145.167	6	2018-08-14 16:01:00	2018-08-14 16:01:00	996.035	128.01	1.35698	0.286906	1.3516	0.334421	0.169941	0.0302877	0.169267	0.0371931	0.0139915	0.00396844	0.013936	0.00433956	0.556897	0.17815	0.554688	0.191229	0.0452341	0.0163078	0.0450547	0.0172444
47	147.846	SS4	4	1	50.18	-145.167	5	2018-08-14 16:01:00	2018-08-14 16:01:00	634.32	166.859	1.13326	0.287223	0.718847	0.262584	0.123423	0.0244578	0.07829	0.025784	0.00948847	0.00344978	0.00601873	0.00270095	0.5281	0.195844	0.334985	0.152307	0.0452341	0.0163078	0.0286929	0.0128053
46	197.356	SS4	4	1	50.18	-145.167	3	2018-08-14 16:01:00	2018-08-14 16:01:00	742.867	303.187	1.03146	0.0712206	0.766237	0.317169	0.125894	0.0160005	0.0935227	0.0399774	0.00921851	0.00258265	0.00684813	0.00339007	0.534403	0.203876	0.396991	0.221788	0.0452341	0.0163078	0.0336029	0.0182988
45	332.18	SS4	4	1	50.18	-145.167	2	2018-08-14 16:01:00	2018-08-14 16:01:00	569.498	354.66	0.929128	0.149008	0.529137	0.340276	0.108274	0.0303669	0.0616621	0.0421151	0.00709308	0.000395141	0.0040395	0.00252568	0.521982	0.188324	0.297268	0.213949	0.0452341	0.0163078	0.0257607	0.018537
56	5.807	SS5	5	1	50.243	-145.112	13	2018-08-14 18:08:00	2018-08-14 18:08:00	345.695	25.1304	5.30452	1.89986	1.83375	0.670165	0.798586	0.358632	0.276067	0.125591	0.184484	0.077162	0.0637754	0.0270744	0.784293	0.237113	0.271126	0.0843051	0.0452341	0.0163078	0.0156372	0.005751
65	20.649	SS5	5	1	50.243	-145.112	12	2018-08-14 18:08:00	2018-08-14 18:08:00	927.42	50.423	5.30452	1.89986	4.91952	1.78216	0.798586	0.358632	0.740625	0.335031	0.184484	0.077162	0.171095	0.0721636	0.784293	0.237113	0.727369	0.223431	0.0452341	0.0163078	0.041951	0.0152952
63	50.126	SS5	5	1	50.243	-145.112	10	2018-08-14 18:08:00	2018-08-14 18:08:00	1465	85.0211	5.30452	1.89986	7.77115	2.81961	0.798586	0.358632	1.16993	0.529766	0.184484	0.077162	0.270271	0.114126	0.784293	0.237113	1.14899	0.353714	0.0452341	0.0163078	0.0662681	0.0241986
62	80.366	SS5	5	1	50.243	-145.112	8	2018-08-14 18:08:00	2018-08-14 18:08:00	1309.79	107.536	3.06593	0.734195	4.01572	1.01659	0.453428	0.12373	0.593895	0.169237	0.0882288	0.0243967	0.115561	0.0333334	0.664073	0.183132	0.869796	0.250269	0.0452341	0.0163078	0.0592471	0.0219067
61	95.542	SS5	5	1	50.243	-145.112	7	2018-08-14 18:08:00	2018-08-14 18:08:00	1316.66	114.317	1.94745	0.350827	2.56414	0.512771	0.280421	0.0518377	0.369221	0.0754062	0.0396656	0.00819915	0.0522263	0.0117092	0.604886	0.158548	0.796432	0.219909	0.0452341	0.0163078	0.0595581	0.0220858
60	110.239	SS5	5	1	50.243	-145.112	6	2018-08-14 18:08:00	2018-08-14 18:08:00	1457.19	119.998	1.51309	0.275547	2.20485	0.440668	0.202398	0.0332571	0.294932	0.0542072	0.0186283	0.00427587	0.0271449	0.0066196	0.576989	0.164067	0.840781	0.2489	0.0452341	0.0163078	0.0659145	0.0243756
59	125.228	SS5	5	1	50.243	-145.112	5	2018-08-14 18:08:00	2018-08-14 18:08:00	1215.38	132.472	1.3617	0.286697	1.65498	0.392368	0.170921	0.0303907	0.207734	0.0433238	0.0141316	0.00398508	0.0171752	0.00519257	0.557504	0.177746	0.677577	0.228303	0.0452341	0.0163078	0.0549764	0.0207062
58	145.291	SS5	5	1	50.243	-145.112	4	2018-08-14 18:08:00	2018-08-14 18:08:00	1094.78	166.254	1.15906	0.288146	1.26891	0.369655	0.128789	0.0252248	0.140995	0.0349439	0.00948847	0.00344978	0.0103878	0.00409295	0.531422	0.193953	0.581789	0.229983	0.0452341	0.0163078	0.0495212	0.0193727
57	194.914	SS5	5	1	50.243	-145.112	3	2018-08-14 18:08:00	2018-08-14 18:08:00	1599.27	289.979	1.03585	0.0815968	1.65662	0.327498	0.125797	0.0165103	0.201183	0.0450319	0.0092356	0.00262803	0.0147703	0.00498369	0.534403	0.203876	0.854657	0.361006	0.0452341	0.0163078	0.0723416	0.0291934
66 avg	331.846	SS5	5	1	50.243	-145.112	2	2018-08-14 18:08:00	2018-08-14 18:08:00	1473.86	318.217	0.929262	0.148992	1.3696	0.368325	0.108248	0.0303268	0.159542	0.0564306	0.00709108	0.000393609	0.0104513	0.00232988	0.521982	0.188324	0.76933	0.323469	0.0452341	0.0163078	0.0666688	0.028016
77	4.959	SS6	6	1	50.206	-145.015	13	2018-08-14 19:50:00	2018-08-14 19:50:00	242.561	27.3342	5.30452	1.89986	1.28667	0.483105	0.798586	0.358632	0.193706	0.0896872	0.184484	0.077162	0.0447488	0.0193839	0.784293	0.237113	0.190239	0.06138	0.0452341	0.0163078	0.010972	0.00414439
76	19.961	SS6	6	1	50.206	-145.015	12	2018-08-14 19:50:00	2018-08-14 19:50:00	653.615	38.7642	5.30452	1.89986	3.46712	1.25869	0.798586	0.358632	0.521968	0.236442	0.184484	0.077162	0.120582	0.0509387	0.784293	0.237113	0.512626	0.157934	0.0452341	0.0163078	0.0295657	0.0108023
75	35.294	SS6	6	1	50.206	-145.015	11	2018-08-14 19:50:00	2018-08-14 19:50:00	940.036	51.7969	5.30452	1.89986	4.98644	1.80695	0.798586	0.358632	0.7507	0.339655	0.184484	0.077162	0.173422	0.0731618	0.784293	0.237113	0.737264	0.226567	0.0452341	0.0163078	0.0425216	0.015508
74	50.623	SS6	6	1	50.206	-145.015	10	2018-08-14 19:50:00	2018-08-14 19:50:00	1197.34	76.2443	5.25798	1.87045	6.2956	2.27516	0.792498	0.352968	0.94889	0.42692	0.183406	0.0758081	0.2196	0.091839	0.78007	0.236002	0.93401	0.288766	0.0452341	0.0163078	0.0541606	0.0198282
73	79.063	SS6	6	1	50.206	-145.015	8	2018-08-14 19:50:00	2018-08-14 19:50:00	1510.25	91.6665	3.16196	0.773297	4.77534	1.2033	0.468282	0.131322	0.707222	0.202922	0.0923984	0.0261035	0.139545	0.0403223	0.669154	0.185318	1.01059	0.286519	0.0452341	0.0163078	0.0683146	0.0249755
72	96.423	SS6	6	1	50.206	-145.015	7	2018-08-14 19:50:00	2018-08-14 19:50:00	1542.62	100.108	1.88252	0.332647	2.90402	0.546659	0.270378	0.0485995	0.41709	0.079707	0.0368464	0.00746708	0.05684	0.0120951	0.60145	0.157171	0.92781	0.249819	0.0452341	0.0163078	0.069779	0.0255611
71	109.605	SS6	6	1	50.206	-145.015	6	2018-08-14 19:50:00	2018-08-14 19:50:00	1620.3	107.728	1.51949	0.274886	2.46202	0.474524	0.20373	0.0333596	0.330102	0.0583382	0.0188185	0.00427777	0.0304915	0.00722165	0.577814	0.163459	0.936229	0.272068	0.0452341	0.0163078	0.0732926	0.0268691
70	126.001	SS6	6	1	50.206	-145.015	5	2018-08-14 19:50:00	2018-08-14 19:50:00	1571	119.612	1.35389	0.287038	2.12696	0.479134	0.169298	0.0302198	0.265967	0.0516137	0.0138997	0.00395729	0.0218364	0.00643538	0.556499	0.178415	0.87426	0.288085	0.0452341	0.0163078	0.0710627	0.0261847
69	146.376	SS6	6	1	50.206	-145.015	4	2018-08-14 19:50:00	2018-08-14 19:50:00	1902.13	144.176	1.1481	0.287785	2.18384	0.571883	0.12651	0.0249021	0.240639	0.0507574	0.00948847	0.00344978	0.0180483	0.00670299	0.530011	0.19476	1.00815	0.378258	0.0452341	0.0163078	0.0860409	0.0316977
68	196.039	SS6	6	1	50.206	-145.015	3	2018-08-14 19:50:00	2018-08-14 19:50:00	1943.31	278.44	1.03383	0.076806	2.00905	0.324255	0.125842	0.0162756	0.244549	0.0472029	0.00922773	0.00260711	0.0179323	0.00568069	0.534403	0.203876	1.03851	0.423215	0.0452341	0.0163078	0.0879037	0.0341022
67	328.884	SS6	6	1	50.206	-145.015	2	2018-08-14 19:50:00	2018-08-14 19:50:00	2462.04	320.165	0.939781	0.150368	2.31378	0.477064	0.10761	0.0289389	0.26494	0.0791417	0.00702652	0.000427261	0.0172996	0.00248344	0.521982	0.188324	1.28514	0.492862	0.0452341	0.0163078	0.111368	0.0426826
78	6.233	SS7	9	1	50.144	-145.07	13	2018-08-15 05:10:00	2018-08-15 05:10:00	381.62	23.276	5.30452	1.89986	2.02431	0.735464	0.798586	0.358632	0.304757	0.138118	0.184484	0.077162	0.070403	0.029758	0.784293	0.237113	0.299302	0.0923102	0.0452341	0.0163078	0.0172622	0.00631183
79	20.587	SS7	9	1	50.144	-145.07	12	2018-08-15 05:10:00	2018-08-15 05:10:00	843.41	30.3085	5.30452	1.89986	4.47389	1.61041	0.798586	0.358632	0.673536	0.303441	0.184484	0.077162	0.155596	0.065319	0.784293	0.237113	0.661481	0.201391	0.0452341	0.0163078	0.0381509	0.0138223
80	36.06	SS7	9	1	50.144	-145.07	11	2018-08-15 05:10:00	2018-08-15 05:10:00	1280.72	37.8292	5.30452	1.89986	6.79362	2.44145	0.798586	0.358632	1.02277	0.4603	0.184484	0.077162	0.236273	0.0990691	0.784293	0.237113	1.00446	0.305122	0.0452341	0.0163078	0.0579322	0.0209557
81	50.442	SS7	9	1	50.144	-145.07	10	2018-08-15 05:10:00	2018-08-15 05:10:00	1646.92	46.0752	5.30452	1.89986	8.73612	3.13845	0.798586	0.358632	1.31521	0.591782	0.184484	0.077162	0.303831	0.127363	0.784293	0.237113	1.29167	0.392174	0.0452341	0.0163078	0.0744968	0.0269384
82	65.836	SS7	9	1	50.144	-145.07	9	2018-08-15 05:10:00	2018-08-15 05:10:00	2005	52.0325	4.13679	1.22559	8.29426	2.46672	0.61907	0.221101	1.24123	0.444477	0.134725	0.0462584	0.270123	0.0930125	0.72074	0.208184	1.44508	0.41909	0.0452341	0.0163078	0.0906943	0.0327818
83	82.276	SS7	9	1	50.144	-145.07	8	2018-08-15 05:10:00	2018-08-15 05:10:00	2137.3	65.1702	2.92516	0.678646	6.25193	1.46294	0.431654	0.113007	0.922571	0.243161	0.0821168	0.0219852	0.175508	0.0472926	0.656624	0.179949	1.4034	0.386977	0.0452341	0.0163078	0.0966785	0.0349791
84	96.823	SS7	9	1	50.144	-145.07	7	2018-08-15 05:10:00	2018-08-15 05:10:00	2245.75	71.1347	1.85304	0.32454	4.16148	0.740661	0.265818	0.0471631	0.596961	0.107591	0.0355664	0.00714224	0.0798733	0.016238	0.59989	0.156547	1.34721	0.354146	0.0452341	0.0163078	0.101584	0.0367644
85	111.629	SS7	9	1	50.144	-145.07	6	2018-08-15 05:10:00	2018-08-15 05:10:00	2210.67	83.5179	1.49905	0.276943	3.3139	0.6249	0.199479	0.033027	0.440982	0.0748884	0.0182113	0.00426876	0.0402592	0.0095586	0.575182	0.165392	1.27154	0.368769	0.0452341	0.0163078	0.0999976	0.0362486
86	126.726	SS7	9	1	50.144	-145.07	5	2018-08-15 05:10:00	2018-08-15 05:10:00	2242.34	97.2082	1.34657	0.287338	3.01946	0.657469	0.167775	0.0300575	0.376209	0.0693442	0.0136822	0.00393009	0.0306801	0.00891238	0.555556	0.179039	1.24574	0.405081	0.0452341	0.0163078	0.10143	0.036831
87	146.62	SS7	9	1	50.144	-145.07	4	2018-08-15 05:10:00	2018-08-15 05:10:00	1899.56	139.228	1.14564	0.287697	2.17621	0.569299	0.125998	0.0248289	0.239341	0.0503208	0.00948847	0.00344978	0.0180239	0.00668489	0.529694	0.194941	1.00619	0.377575	0.0452341	0.0163078	0.0859248	0.0316114
88	196.389	SS7	9	1	50.144	-145.07	3	2018-08-15 05:10:00	2018-08-15 05:10:00	1624.05	281.434	1.0332	0.0753192	1.67797	0.315459	0.125856	0.0162025	0.204396	0.0441246	0.00922528	0.0026006	0.0149823	0.00495771	0.534403	0.203876	0.867898	0.363663	0.0452341	0.0163078	0.0734624	0.0293854
89	330.773	SS7	9	1	50.144	-145.07	2	2018-08-15 05:10:00	2018-08-15 05:10:00	1918.75	440.138	0.929691	0.14894	1.78384	0.499107	0.108162	0.0301983	0.207535	0.0749916	0.00708464	0.00038869	0.0135936	0.00320617	0.521982	0.188324	1.00155	0.428199	0.0452341	0.0163078	0.0867928	0.0370874
90	500.61	SS7	9	1	50.144	-145.07	1	2018-08-15 05:10:00	2018-08-15 05:10:00	1469.19	510.121	0.876803	0.158282	1.28819	0.504116	0.120949	0.0504373	0.177696	0.096425	0.00803236	0.00133428	0.011801	0.00454226	0.802252	0.183303	1.17866	0.489906	0.0452341	0.0163078	0.0664573	0.033264
133	4.896	SS13	10	1	50.17	-144.918	23	2018-08-15 15:44:00	2018-08-15 15:44:00	521.264	25.9817	5.30452	1.89986	2.76506	0.999872	0.798586	0.358632	0.416274	0.18809	0.184484	0.077162	0.096165	0.0405063	0.784293	0.237113	0.408823	0.125267	0.0452341	0.0163078	0.0235789	0.00858153
131	25.542	SS13	10	1	50.17	-144.918	16	2018-08-15 15:44:00	2018-08-15 15:44:00	1019.64	54.4364	5.30452	1.89986	5.40873	1.95859	0.798586	0.358632	0.814274	0.368252	0.184484	0.077162	0.188109	0.0793161	0.784293	0.237113	0.7997	0.245512	0.0452341	0.0163078	0.0461226	0.0168095
130	50.557	SS13	10	1	50.17	-144.918	13	2018-08-15 15:44:00	2018-08-15 15:44:00	1332.25	80.5663	5.26285	1.87354	7.01145	2.53178	0.79325	0.353607	1.05681	0.475409	0.183618	0.0759512	0.244625	0.102262	0.780328	0.236126	1.03959	0.3208	0.0452341	0.0163078	0.0602632	0.0220297
129	75.467	SS13	10	1	50.17	-144.918	11	2018-08-15 15:44:00	2018-08-15 15:44:00	1375.44	100.231	3.42698	0.886284	4.71361	1.2665	0.509276	0.153441	0.700479	0.217134	0.103906	0.0310732	0.142916	0.0439899	0.683179	0.191413	0.939671	0.272036	0.0452341	0.0163078	0.0622167	0.022884
128	95.578	SS13	10	1	50.17	-144.918	9	2018-08-15 15:44:00	2018-08-15 15:44:00	1316.28	110.787	1.9448	0.350075	2.55991	0.508682	0.280011	0.0517033	0.368574	0.074793	0.0395504	0.00816879	0.0520596	0.011611	0.604746	0.158492	0.796018	0.219114	0.0452341	0.0163078	0.0595409	0.0220429
127	110.254	SS13	10	1	50.17	-144.918	7	2018-08-15 15:44:00	2018-08-15 15:44:00	1296.14	117.604	1.51293	0.275563	1.96098	0.399033	0.202367	0.0332546	0.262296	0.0492366	0.0186238	0.00427582	0.0241391	0.00595917	0.57697	0.164081	0.747835	0.223235	0.0452341	0.0163078	0.0586298	0.0217964
126	125.341	SS13	10	1	50.17	-144.918	6	2018-08-15 15:44:00	2018-08-15 15:44:00	1268.92	129.448	1.36056	0.286748	1.72644	0.404244	0.170684	0.0303658	0.216584	0.0444171	0.0140977	0.0039811	0.0178889	0.00537122	0.557357	0.177844	0.707241	0.236922	0.0452341	0.0163078	0.0573984	0.0215058
125	149.919	SS13	10	1	50.17	-144.918	5	2018-08-15 15:44:00	2018-08-15 15:44:00	1241.8	163.128	1.11696	0.287669	1.38704	0.401012	0.12436	0.0256419	0.15443	0.0377553	0.00948847	0.00344978	0.0117828	0.00455498	0.526488	0.194504	0.653793	0.25635	0.0452341	0.0163078	0.0561717	0.0215535
124	196.486	SS13	10	1	50.17	-144.918	3	2018-08-15 15:44:00	2018-08-15 15:44:00	255.634	324.476	1.03303	0.0749075	0.264077	0.335738	0.125859	0.0161822	0.032174	0.0410473	0.0092246	0.0025988	0.00235812	0.003066	0.534403	0.203876	0.136612	0.181064	0.0452341	0.0163078	0.0115634	0.0152579
123	331.6	SS13	10	1	50.17	-144.918	2	2018-08-15 15:44:00	2018-08-15 15:44:00	374.437	372.247	0.92936	0.14898	0.347987	0.35042	0.108228	0.0302973	0.0405246	0.0418543	0.0070896	0.00039248	0.00265461	0.00264317	0.521982	0.188324	0.195449	0.206706	0.0452341	0.0163078	0.0169373	0.0179113
134	4.665	SS12	11	1	50.109	-144.974	13	2018-08-15 17:28:00	2018-08-15 17:28:00	297.069	26.6402	5.30452	1.89986	1.57581	0.581812	0.798586	0.358632	0.237235	0.108642	0.184484	0.077162	0.0548045	0.0234433	0.784293	0.237113	0.232989	0.0734723	0.0452341	0.0163078	0.0134376	0.00499216
135	20.365	SS12	11	1	50.109	-144.974	12	2018-08-15 17:28:00	2018-08-15 17:28:00	658.907	42.1004	5.30452	1.89986	3.49519	1.2716	0.798586	0.358632	0.526194	0.238685	0.184484	0.077162	0.121558	0.0514324	0.784293	0.237113	0.516776	0.159686	0.0452341	0.0163078	0.029805	0.0109128
136	35.202	SS12	11	1	50.109	-144.974	11	2018-08-15 17:28:00	2018-08-15 17:28:00	997.388	53.4166	5.30452	1.89986	5.29067	1.91597	0.798586	0.358632	0.7965	0.36023	0.184484	0.077162	0.184003	0.0775888	0.784293	0.237113	0.782244	0.240176	0.0452341	0.0163078	0.0451159	0.0164437
137	50.157	SS12	11	1	50.109	-144.974	10	2018-08-15 17:28:00	2018-08-15 17:28:00	1275.23	62.7647	5.30452	1.89986	6.76447	2.44552	0.798586	0.358632	1.01838	0.460075	0.184484	0.077162	0.23526	0.0990779	0.784293	0.237113	1.00015	0.306354	0.0452341	0.0163078	0.0576837	0.0209891
138	65.501	SS12	11	1	50.109	-144.974	9	2018-08-15 17:28:00	2018-08-15 17:28:00	1437.57	74.433	4.16148	1.23836	5.9824	1.80697	0.622889	0.223676	0.895443	0.324874	0.135797	0.0468357	0.195217	0.0680839	0.722046	0.208779	1.03799	0.304907	0.0452341	0.0163078	0.0650269	0.0236841
139	79.799	SS12	11	1	50.109	-144.974	8	2018-08-15 17:28:00	2018-08-15 17:28:00	1427.71	85.3648	3.10771	0.75109	4.43692	1.10467	0.459891	0.127006	0.656592	0.185529	0.0900432	0.0251333	0.128556	0.0366971	0.666284	0.184082	0.951261	0.268899	0.0452341	0.0163078	0.0645812	0.0236009
140	95.377	SS12	11	1	50.109	-144.974	7	2018-08-15 17:28:00	2018-08-15 17:28:00	1429.17	95.0974	1.95962	0.354281	2.80062	0.539532	0.282302	0.0524555	0.403457	0.0796296	0.0401936	0.0083388	0.0574433	0.0125155	0.60553	0.158807	0.865403	0.234152	0.0452341	0.0163078	0.064647	0.0237002
141	110.948	SS12	11	1	50.109	-144.974	6	2018-08-15 17:28:00	2018-08-15 17:28:00	1390.23	103.875	1.50593	0.276269	2.09358	0.414711	0.200909	0.0331406	0.27931	0.0505793	0.0184156	0.00427275	0.0256019	0.00624053	0.576068	0.164744	0.800867	0.23672	0.0452341	0.0163078	0.0628858	0.0231534
142	125.68	SS12	11	1	50.109	-144.974	5	2018-08-15 17:28:00	2018-08-15 17:28:00	1467.95	113.532	1.35713	0.286899	1.99221	0.448454	0.169972	0.0302911	0.249511	0.0484726	0.013996	0.00396899	0.0205455	0.00603908	0.556916	0.178137	0.817526	0.269033	0.0452341	0.0163078	0.0664014	0.0244837
143	145.411	SS12	11	1	50.109	-144.974	4	2018-08-15 17:28:00	2018-08-15 17:28:00	1476.46	149.201	1.15785	0.288108	1.70951	0.45912	0.128537	0.0251894	0.189779	0.0418445	0.00948847	0.00344978	0.0140093	0.00528653	0.531266	0.194042	0.784391	0.297258	0.0452341	0.0163078	0.0667861	0.0250058
144	195.308	SS12	11	1	50.109	-144.974	3	2018-08-15 17:28:00	2018-08-15 17:28:00	1126.32	299.473	1.03515	0.0799169	1.1659	0.322802	0.125812	0.0164281	0.141704	0.0419757	0.00923284	0.0026207	0.0103991	0.00404449	0.534403	0.203876	0.601907	0.279897	0.0452341	0.0163078	0.0509478	0.0228228
145	329.627	SS12	11	1	50.109	-144.974	2	2018-08-15 17:28:00	2018-08-15 17:28:00	1391	511.926	0.939781	0.150368	1.30724	0.5246	0.10761	0.0289389	0.149685	0.0682283	0.00702652	0.000427261	0.0097739	0.00364583	0.521982	0.188324	0.726077	0.374202	0.0452341	0.0163078	0.0629206	0.032416
146	501.525	SS12	11	1	50.109	-144.974	1	2018-08-15 17:28:00	2018-08-15 17:28:00	1192.99	566.994	0.876803	0.158282	1.04602	0.531795	0.120949	0.0504373	0.144291	0.0912328	0.00803236	0.00133428	0.00958254	0.00482446	0.802252	0.183303	0.957079	0.504707	0.0452341	0.0163078	0.0539638	0.0321915
147	5.244	SS14	12	1	50.135	-144.82	13	2018-08-15 19:09:00	2018-08-15 19:09:00	319.033	27.8799	5.30452	1.89986	1.69232	0.6239	0.798586	0.358632	0.254775	0.116561	0.184484	0.077162	0.0588566	0.0251488	0.784293	0.237113	0.250215	0.0787437	0.0452341	0.0163078	0.0144312	0.00535339
148	20.589	SS14	12	1	50.135	-144.82	12	2018-08-15 19:09:00	2018-08-15 19:09:00	689.587	38.8526	5.30452	1.89986	3.65793	1.32623	0.798586	0.358632	0.550695	0.249246	0.184484	0.077162	0.127218	0.0536905	0.784293	0.237113	0.540838	0.166325	0.0452341	0.0163078	0.0311928	0.0113822
149	35.525	SS14	12	1	50.135	-144.82	11	2018-08-15 19:09:00	2018-08-15 19:09:00	1037.16	50.5353	5.30452	1.89986	5.50164	1.98861	0.798586	0.358632	0.828262	0.374141	0.184484	0.077162	0.19134	0.0805705	0.784293	0.237113	0.813437	0.249098	0.0452341	0.0163078	0.046915	0.0170676
150	50.093	SS14	12	1	50.135	-144.82	10	2018-08-15 19:09:00	2018-08-15 19:09:00	1385.15	57.6113	5.30452	1.89986	7.34758	2.64928	0.798586	0.358632	1.10617	0.498886	0.184484	0.077162	0.255539	0.107408	0.784293	0.237113	1.08637	0.331532	0.0452341	0.0163078	0.0626561	0.0227387
151	65.598	SS14	12	1	50.135	-144.82	9	2018-08-15 19:09:00	2018-08-15 19:09:00	1591.65	66.8427	4.15433	1.23466	6.61225	1.98467	0.621783	0.222929	0.989662	0.357251	0.135486	0.0466682	0.215647	0.0748296	0.721668	0.208607	1.14864	0.335515	0.0452341	0.0163078	0.0719969	0.0261319
152	80.65	SS14	12	1	50.135	-144.82	8	2018-08-15 19:09:00	2018-08-15 19:09:00	1647.68	75.8574	3.04499	0.725802	5.01718	1.21799	0.45019	0.122105	0.74177	0.204068	0.08732	0.0240313	0.143876	0.0401462	0.662965	0.182657	1.09236	0.305133	0.0452341	0.0163078	0.0745313	0.0270883
153	95.715	SS14	12	1	50.135	-144.82	7	2018-08-15 19:09:00	2018-08-15 19:09:00	1656.05	84.1197	1.9347	0.347222	3.20397	0.597604	0.278449	0.0511937	0.461126	0.0879556	0.039112	0.00805359	0.0647715	0.013737	0.604212	0.158277	1.00061	0.266997	0.0452341	0.0163078	0.0749099	0.0272733
154	110.051	SS14	12	1	50.135	-144.82	6	2018-08-15 19:09:00	2018-08-15 19:09:00	1628.46	93.1494	1.51498	0.275353	2.46709	0.470083	0.202793	0.0332876	0.33024	0.0574046	0.0186847	0.00427653	0.0304273	0.00717834	0.577234	0.163887	0.940002	0.272245	0.0452341	0.0163078	0.0736618	0.0268888
155	125.366	SS14	12	1	50.135	-144.82	5	2018-08-15 19:09:00	2018-08-15 19:09:00	1531.04	105.817	1.3603	0.286759	2.08269	0.462035	0.170631	0.0303603	0.261244	0.0498666	0.0140902	0.00398021	0.0215727	0.00627363	0.557324	0.177865	0.853288	0.278633	0.0452341	0.0163078	0.0692554	0.0254227
156	145.847	SS14	12	1	50.135	-144.82	4	2018-08-15 19:09:00	2018-08-15 19:09:00	1344.14	145.303	1.15345	0.287967	1.55039	0.421794	0.127621	0.02506	0.171541	0.0384511	0.00948847	0.00344978	0.0127538	0.0048376	0.530699	0.194367	0.713332	0.272399	0.0452341	0.0163078	0.0608008	0.0228841
157	195.865	SS14	12	1	50.135	-144.82	3	2018-08-15 19:09:00	2018-08-15 19:09:00	1207.65	278.248	1.03414	0.0775458	1.24888	0.302603	0.125835	0.0163119	0.151964	0.0401743	0.00922895	0.00261034	0.0111453	0.00406593	0.534403	0.203876	0.645371	0.287629	0.0452341	0.0163078	0.0546269	0.0233725
158	329.931	SS14	12	1	50.135	-144.82	2	2018-08-15 19:09:00	2018-08-15 19:09:00	788.385	338.58	0.939781	0.150368	0.740909	0.339557	0.10761	0.0289389	0.0848378	0.0429883	0.00702652	0.000427261	0.0055396	0.00240277	0.521982	0.188324	0.411522	0.230821	0.0452341	0.0163078	0.0356618	0.0199964
204	4.797	SS15	16	1	50.072	-144.876	23	2018-08-16 15:30:00	2018-08-16 15:30:00	206.732	21.4721	5.30452	1.89986	1.09662	0.408944	0.798586	0.358632	0.165093	0.0760978	0.184484	0.077162	0.0381389	0.0164363	0.784293	0.237113	0.162139	0.051831	0.0452341	0.0163078	0.00935133	0.00350847
203	16.022	SS15	16	1	50.072	-144.876	19	2018-08-16 15:30:00	2018-08-16 15:30:00	442.794	29.8318	5.30452	1.89986	2.34881	0.856	0.798586	0.358632	0.353609	0.160577	0.184484	0.077162	0.0816885	0.0346072	0.784293	0.237113	0.34728	0.107567	0.0452341	0.0163078	0.0200293	0.007346
202	25.135	SS15	16	1	50.072	-144.876	16	2018-08-16 15:30:00	2018-08-16 15:30:00	756.435	47.0618	5.30452	1.89986	4.01253	1.45864	0.798586	0.358632	0.604079	0.273873	0.184484	0.077162	0.13955	0.0590102	0.784293	0.237113	0.593267	0.183119	0.0452341	0.0163078	0.0342166	0.0125181
201	49.552	SS15	16	1	50.072	-144.876	13	2018-08-16 15:30:00	2018-08-16 15:30:00	1434.32	86.6767	5.30452	1.89986	7.60838	2.76352	0.798586	0.358632	1.14543	0.519029	0.184484	0.077162	0.26461	0.111824	0.784293	0.237113	1.12493	0.346823	0.0452341	0.0163078	0.0648801	0.0237169
199	94.303	SS15	16	1	50.072	-144.876	9	2018-08-16 15:30:00	2018-08-16 15:30:00	1578.14	115.982	2.03877	0.377151	3.21746	0.640447	0.294546	0.0565653	0.464834	0.0955814	0.0436304	0.00926737	0.0688548	0.0154759	0.609718	0.160495	0.962219	0.262969	0.0452341	0.0163078	0.0713856	0.0262653
198	109.602	SS15	16	1	50.072	-144.876	7	2018-08-16 15:30:00	2018-08-16 15:30:00	1585.97	124.006	1.51952	0.274883	2.40991	0.474934	0.203736	0.0333601	0.323118	0.0586306	0.0188194	0.00427778	0.0298469	0.00717458	0.577817	0.163456	0.916399	0.268955	0.0452341	0.0163078	0.0717397	0.0264649
197	125.604	SS15	16	1	50.072	-144.876	6	2018-08-16 15:30:00	2018-08-16 15:30:00	1604.96	135.227	1.3579	0.286866	2.17937	0.495673	0.170132	0.0303079	0.273054	0.053809	0.0140188	0.00397172	0.0224996	0.00665035	0.557015	0.178072	0.893984	0.295556	0.0452341	0.0163078	0.0725987	0.0268786
196	150.608	SS15	16	1	50.072	-144.876	5	2018-08-16 15:30:00	2018-08-16 15:30:00	1535.95	175.63	1.11561	0.284701	1.71351	0.479176	0.124024	0.0256193	0.190495	0.0449765	0.00948847	0.00344978	0.0145738	0.00555455	0.526488	0.194504	0.808658	0.31273	0.0452341	0.0163078	0.0694771	0.0262776
195	195.352	SS15	16	1	50.072	-144.876	3	2018-08-16 15:30:00	2018-08-16 15:30:00	1369.39	311.611	1.03507	0.0797294	1.41741	0.340517	0.125814	0.0164189	0.172289	0.0451948	0.00923254	0.00261988	0.012643	0.00459871	0.534403	0.203876	0.731808	0.325079	0.0452341	0.0163078	0.0619432	0.0264082
194	329.905	SS15	16	1	50.072	-144.876	2	2018-08-16 15:30:00	2018-08-16 15:30:00	1189.73	361.008	0.939781	0.150368	1.11809	0.383546	0.10761	0.0289389	0.128027	0.0519092	0.00702652	0.000427261	0.0083597	0.00258706	0.521982	0.188324	0.62102	0.292764	0.0452341	0.0163078	0.0538165	0.0253594
205	5.605	SS16	17	1	50.01	-144.932	17	2018-08-16 17:17:00	2018-08-16 17:17:00	325.915	29.6521	5.30452	1.89986	1.72883	0.638859	0.798586	0.358632	0.260271	0.119258	0.184484	0.077162	0.0601263	0.0257363	0.784293	0.237113	0.255613	0.0807022	0.0452341	0.0163078	0.0147425	0.0054816
206	20.409	SS16	17	1	50.01	-144.932	16	2018-08-16 17:17:00	2018-08-16 17:17:00	615.454	41.5417	5.30452	1.89986	3.26469	1.18986	0.798586	0.358632	0.491493	0.223201	0.184484	0.077162	0.113542	0.0481041	0.784293	0.237113	0.482696	0.149525	0.0452341	0.0163078	0.0278395	0.0102111
207	35.527	SS16	17	1	50.01	-144.932	15	2018-08-16 17:17:00	2018-08-16 17:17:00	1065.72	49.7819	5.30452	1.89986	5.65311	2.04186	0.798586	0.358632	0.851066	0.384261	0.184484	0.077162	0.196608	0.082744	0.784293	0.237113	0.835833	0.255694	0.0452341	0.0163078	0.0482066	0.0175248
208	50.195	SS16	17	1	50.01	-144.932	14	2018-08-16 17:17:00	2018-08-16 17:17:00	1341.2	59.2326	5.30452	1.89986	7.1144	2.56738	0.798586	0.358632	1.07106	0.483316	0.184484	0.077162	0.24743	0.104065	0.784293	0.237113	1.05189	0.32139	0.0452341	0.0163078	0.0606677	0.0220355
209	65.166	SS16	17	1	50.01	-144.932	13	2018-08-16 17:17:00	2018-08-16 17:17:00	1523.97	68.9645	4.18617	1.25119	6.37959	1.9285	0.626708	0.226265	0.955084	0.347519	0.136869	0.0474163	0.208584	0.072875	0.723353	0.209375	1.10237	0.322957	0.0452341	0.0163078	0.0689353	0.0250476
210	80.246	SS16	17	1	50.01	-144.932	12	2018-08-16 17:17:00	2018-08-16 17:17:00	1666.84	78.2251	3.07477	0.737755	5.12515	1.25302	0.454796	0.12442	0.758072	0.210418	0.0886128	0.0245518	0.147703	0.0415069	0.664541	0.183333	1.10768	0.309976	0.0452341	0.0163078	0.075398	0.0274119
211	95.226	SS16	17	1	50.01	-144.932	11	2018-08-16 17:17:00	2018-08-16 17:17:00	1684.56	87.0682	1.97074	0.357457	3.31984	0.626128	0.284024	0.0530241	0.478455	0.0926824	0.0406768	0.0084673	0.0685226	0.0146968	0.606119	0.159043	1.02104	0.273067	0.0452341	0.0163078	0.0761995	0.0277524
212	109.908	SS16	17	1	50.01	-144.932	10	2018-08-16 17:17:00	2018-08-16 17:17:00	1606.89	95.7905	1.51643	0.275204	2.43673	0.465468	0.203093	0.0333108	0.326348	0.0569525	0.0187276	0.00427697	0.0300932	0.00710289	0.57742	0.16375	0.927849	0.268878	0.0452341	0.0163078	0.0726861	0.0265607
213	125.268	SS16	17	1	50.01	-144.932	9	2018-08-16 17:17:00	2018-08-16 17:17:00	1436.51	108.274	1.36129	0.286715	1.95551	0.437448	0.170837	0.0303819	0.24541	0.0474019	0.0141196	0.00398368	0.020283	0.00592329	0.557452	0.17778	0.800786	0.262419	0.0452341	0.0163078	0.0649793	0.0239329
214	144.633	SS16	17	1	50.01	-144.932	8	2018-08-16 17:17:00	2018-08-16 17:17:00	1204.47	150.324	1.16571	0.288343	1.40406	0.389005	0.130171	0.0254184	0.156787	0.0363348	0.00948847	0.00344978	0.0114286	0.00439315	0.532277	0.193459	0.641113	0.246371	0.0452341	0.0163078	0.0544832	0.020786
215	195.403	SS16	17	1	50.01	-144.932	7	2018-08-16 17:17:00	2018-08-16 17:17:00	975.379	184.27	1.03497	0.0795122	1.00949	0.20588	0.125816	0.0164083	0.122718	0.0281716	0.00923218	0.00261893	0.00900487	0.0030691	0.534403	0.203876	0.521246	0.221903	0.0452341	0.0163078	0.0441203	0.0179579
216	220.245	SS16	17	1	50.01	-144.932	6	2018-08-16 17:17:00	2018-08-16 17:17:00	876.359	199.936	1.00713	0.074684	0.882606	0.211731	0.133475	0.0180151	0.116972	0.0310069	0.0078951	0.00195015	0.00691894	0.00232648	0.531475	0.196301	0.465763	0.202202	0.0452341	0.0163078	0.0396413	0.0169127
217	249.489	SS16	17	1	50.01	-144.932	5	2018-08-16 17:17:00	2018-08-16 17:17:00	824.223	214.405	0.986658	0.0957008	0.813226	0.225772	0.130551	0.02182	0.107603	0.0332706	0.00731022	0.00146363	0.00602525	0.00197785	0.528551	0.192129	0.435644	0.194729	0.0452341	0.0163078	0.0372829	0.0165749
218	274.599	SS16	17	1	50.01	-144.932	4	2018-08-16 17:17:00	2018-08-16 17:17:00	873.065	225.192	0.969081	0.113	0.846071	0.239493	0.12804	0.0249369	0.111787	0.03613	0.00680802	0.00108957	0.00594384	0.00180425	0.52604	0.188575	0.459267	0.202826	0.0452341	0.0163078	0.0394923	0.0175065
219	299.658	SS16	17	1	50.01	-144.932	3	2018-08-16 17:17:00	2018-08-16 17:17:00	885.421	238.316	0.951539	0.129578	0.842513	0.254138	0.125534	0.0279092	0.111151	0.0388029	0.00702652	0.000427261	0.00622143	0.00171673	0.523534	0.185053	0.463548	0.205945	0.0452341	0.0163078	0.0400512	0.0180195
220	329.794	SS16	17	1	50.01	-144.932	2	2018-08-16 17:17:00	2018-08-16 17:17:00	1125.12	370.01	0.939781	0.150368	1.05737	0.386701	0.10761	0.0289389	0.121074	0.0514345	0.00702652	0.000427261	0.00790571	0.00264395	0.521982	0.188324	0.587295	0.286704	0.0452341	0.0163078	0.050894	0.0248352
221	500.877	SS16	17	1	50.01	-144.932	1	2018-08-16 17:17:00	2018-08-16 17:17:00	1142.94	438.524	0.876803	0.158282	1.00213	0.424931	0.120949	0.0504373	0.138237	0.0783345	0.00803236	0.00133428	0.00918052	0.00383833	0.802252	0.183303	0.916926	0.409463	0.0452341	0.0163078	0.0516999	0.0272192
222	5.055	SS17	18	1	49.948	-144.989	17	2018-08-16 19:08:00	2018-08-16 19:08:00	302.668	26.4864	5.30452	1.89986	1.60551	0.591942	0.798586	0.358632	0.241706	0.110588	0.184484	0.077162	0.0558375	0.0238601	0.784293	0.237113	0.23738	0.0747124	0.0452341	0.0163078	0.0136909	0.00507918
223	20.329	SS17	18	1	49.948	-144.989	16	2018-08-16 19:08:00	2018-08-16 19:08:00	760.548	49.8351	5.30452	1.89986	4.03435	1.46892	0.798586	0.358632	0.607364	0.275645	0.184484	0.077162	0.140309	0.0594012	0.784293	0.237113	0.596493	0.184523	0.0452341	0.0163078	0.0344027	0.0126061
225	49.569	SS17	18	1	49.948	-144.989	14	2018-08-16 19:08:00	2018-08-16 19:08:00	1141.47	71.7821	5.30452	1.89986	6.05495	2.20181	0.798586	0.358632	0.911561	0.413361	0.184484	0.077162	0.210583	0.0890679	0.784293	0.237113	0.895246	0.27645	0.0452341	0.0163078	0.0516332	0.0188959
226	65.072	SS17	18	1	49.948	-144.989	13	2018-08-16 19:08:00	2018-08-16 19:08:00	1264.38	80.4497	4.19309	1.2548	5.30164	1.622	0.627779	0.226994	0.793748	0.291415	0.13717	0.0475799	0.173434	0.0611625	0.723719	0.209542	0.915053	0.271262	0.0452341	0.0163078	0.0571928	0.0209379
227	80.104	SS17	18	1	49.948	-144.989	12	2018-08-16 19:08:00	2018-08-16 19:08:00	1354.89	88.9121	3.08524	0.741979	4.18016	1.04205	0.456414	0.125239	0.618392	0.17447	0.0890672	0.0247359	0.120676	0.0344373	0.665094	0.18357	0.90113	0.255651	0.0452341	0.0163078	0.0612872	0.0224584
228	94.734	SS17	18	1	49.948	-144.989	11	2018-08-16 19:08:00	2018-08-16 19:08:00	1271.62	98.1356	2.007	0.367893	2.55214	0.507591	0.289632	0.0548977	0.368302	0.0753736	0.0422512	0.00889065	0.0537274	0.0120419	0.608037	0.159816	0.773192	0.211804	0.0452341	0.0163078	0.0575205	0.0212071
229	110.866	SS17	18	1	49.948	-144.989	10	2018-08-16 19:08:00	2018-08-16 19:08:00	1168.9	106.407	1.50675	0.276186	1.76125	0.360455	0.201081	0.0331542	0.235044	0.0442683	0.0184402	0.00427317	0.0215548	0.00536649	0.576174	0.164666	0.673491	0.202007	0.0452341	0.0163078	0.0528741	0.0196605
230	124.921	SS17	18	1	49.948	-144.989	9	2018-08-16 19:08:00	2018-08-16 19:08:00	1090.13	118.907	1.3648	0.286555	1.48781	0.352021	0.171566	0.0304579	0.187029	0.0389695	0.0142237	0.00399577	0.0155057	0.00467274	0.557903	0.177479	0.608187	0.204533	0.0452341	0.0163078	0.0493111	0.0185735
231	145.91	SS17	18	1	49.948	-144.989	8	2018-08-16 19:08:00	2018-08-16 19:08:00	1017.03	151.073	1.15281	0.287945	1.17244	0.340722	0.127489	0.0250413	0.12966	0.0319305	0.00948847	0.00344978	0.00965005	0.00379005	0.530617	0.194414	0.539653	0.213357	0.0452341	0.0163078	0.0460043	0.0179382
232	194.355	SS17	18	1	49.948	-144.989	7	2018-08-16 19:08:00	2018-08-16 19:08:00	1076.33	181.06	1.03686	0.0839841	1.11601	0.208364	0.125774	0.0166269	0.135375	0.0289632	0.00923952	0.00263845	0.00994481	0.00329596	0.534403	0.203876	0.575196	0.239824	0.0452341	0.0163078	0.048687	0.0193694
233	221.106	SS17	18	1	49.948	-144.989	6	2018-08-16 19:08:00	2018-08-16 19:08:00	1047.32	196.327	1.00653	0.0753161	1.05416	0.21277	0.133389	0.0181298	0.139701	0.0323473	0.00787788	0.00193505	0.00825067	0.00254937	0.531389	0.196178	0.556535	0.23043	0.0452341	0.0163078	0.0473746	0.0192504
234	250.475	SS17	18	1	49.948	-144.989	5	2018-08-16 19:08:00	2018-08-16 19:08:00	1025.39	210.572	0.985967	0.0963931	1.011	0.229944	0.130452	0.021945	0.133765	0.0355096	0.0072905	0.00144818	0.00747562	0.00213585	0.528452	0.191989	0.541871	0.226138	0.0452341	0.0163078	0.0463826	0.0192444
235	275.362	SS17	18	1	49.948	-144.989	4	2018-08-16 19:08:00	2018-08-16 19:08:00	929.037	221.105	0.968547	0.113515	0.899816	0.23871	0.127964	0.0250295	0.118883	0.0366229	0.00679276	0.00107883	0.00631073	0.00180563	0.525964	0.188467	0.48864	0.210195	0.0452341	0.0163078	0.0420241	0.0181541
236	300.385	SS17	18	1	49.948	-144.989	3	2018-08-16 19:08:00	2018-08-16 19:08:00	745.413	233.922	0.951031	0.130048	0.708911	0.242671	0.125462	0.0279934	0.0935206	0.0360102	0.00702652	0.000427261	0.00523766	0.00167423	0.523462	0.184951	0.390195	0.184392	0.0452341	0.0163078	0.0337181	0.0161162
237	328.978	SS17	18	1	49.948	-144.989	2	2018-08-16 19:08:00	2018-08-16 19:08:00	362.362	381.941	0.939781	0.150368	0.340541	0.363053	0.10761	0.0289389	0.0389936	0.0424172	0.00702652	0.000427261	0.00254614	0.00268818	0.521982	0.188324	0.189146	0.210722	0.0452341	0.0163078	0.0163911	0.0182594
238	499.141	SS17	18	1	49.948	-144.989	1	2018-08-16 19:08:00	2018-08-16 19:08:00	303.468	456.202	0.876803	0.158282	0.266082	0.402873	0.120949	0.0504373	0.0367041	0.0572607	0.00803236	0.00133428	0.00243757	0.00368668	0.802252	0.183303	0.243458	0.370192	0.0452341	0.0163078	0.0137271	0.021221
239	5.39	SS10	21	1	49.983	-145.086	17	2018-08-17 04:25:00	2018-08-17 04:25:00	268.774	23.8346	5.30452	1.89986	1.42572	0.526053	0.798586	0.358632	0.21464	0.0982524	0.184484	0.077162	0.0495847	0.0212002	0.784293	0.237113	0.210798	0.0664149	0.0452341	0.0163078	0.0121578	0.00451377
240	20.369	SS10	21	1	49.983	-145.086	16	2018-08-17 04:25:00	2018-08-17 04:25:00	769.717	49.8565	5.30452	1.89986	4.08298	1.48608	0.798586	0.358632	0.614686	0.278901	0.184484	0.077162	0.142001	0.0601008	0.784293	0.237113	0.603684	0.186652	0.0452341	0.0163078	0.0348174	0.0127534
242	50.381	SS10	21	1	49.983	-145.086	14	2018-08-17 04:25:00	2018-08-17 04:25:00	941.167	77.0296	5.30452	1.89986	4.99244	1.83418	0.798586	0.358632	0.751603	0.343092	0.184484	0.077162	0.173631	0.0739996	0.784293	0.237113	0.738151	0.231196	0.0452341	0.0163078	0.0425728	0.0157389
243	65.545	SS10	21	1	49.983	-145.086	13	2018-08-17 04:25:00	2018-08-17 04:25:00	1025.64	84.508	4.15823	1.23668	4.26485	1.31616	0.622387	0.223337	0.638345	0.235024	0.135656	0.0467597	0.139134	0.0493098	0.721874	0.208701	0.740384	0.222575	0.0452341	0.0163078	0.0463939	0.0171572
244	79.563	SS10	21	1	49.983	-145.086	12	2018-08-17 04:25:00	2018-08-17 04:25:00	1060.31	93.3515	3.12511	0.758177	3.31357	0.855198	0.462582	0.128382	0.490479	0.14281	0.0907984	0.0254426	0.0962741	0.0282773	0.667204	0.184478	0.707441	0.20528	0.0452341	0.0163078	0.047962	0.0177994
245	95.072	SS10	21	1	49.983	-145.086	11	2018-08-17 04:25:00	2018-08-17 04:25:00	1083.38	104.173	1.98209	0.360708	2.14737	0.441981	0.285779	0.0536071	0.309608	0.0652628	0.0411696	0.00859904	0.0446024	0.0102558	0.606719	0.159285	0.657309	0.183777	0.0452341	0.0163078	0.0490058	0.0182852
246	109.939	SS10	21	1	49.983	-145.086	10	2018-08-17 04:25:00	2018-08-17 04:25:00	1071.47	114.337	1.51612	0.275236	1.62447	0.342081	0.203028	0.0333058	0.217538	0.0425719	0.0187183	0.00427688	0.020056	0.00505767	0.577379	0.163779	0.618643	0.187491	0.0452341	0.0163078	0.0484668	0.0182226
247	125.359	SS10	21	1	49.983	-145.086	9	2018-08-17 04:25:00	2018-08-17 04:25:00	979.588	126.105	1.36037	0.286756	1.33261	0.329144	0.170646	0.0303619	0.167163	0.0367107	0.0140923	0.00398046	0.0138046	0.00428509	0.557333	0.177859	0.545957	0.187871	0.0452341	0.0163078	0.0443107	0.0169628
248	145.216	SS10	21	1	49.983	-145.086	8	2018-08-17 04:25:00	2018-08-17 04:25:00	1081.34	154.326	1.15982	0.288169	1.25416	0.359358	0.128946	0.025247	0.139435	0.0337835	0.00948847	0.00344978	0.0102603	0.00400749	0.531519	0.193897	0.574753	0.225143	0.0452341	0.0163078	0.0489134	0.0189658
249	195.034	SS10	21	1	49.983	-145.086	7	2018-08-17 04:25:00	2018-08-17 04:25:00	1130.36	256.534	1.03564	0.0810849	1.17065	0.281042	0.125801	0.0164853	0.142201	0.0372658	0.00923476	0.0026258	0.0104386	0.00379763	0.534403	0.203876	0.60407	0.268148	0.0452341	0.0163078	0.0511309	0.0217821
241	300.745	SS10	21	1	49.983	-145.086	3	2018-08-17 04:25:00	2018-08-17 04:25:00	1159.92	315.651	0.950778	0.130281	1.10282	0.336013	0.125425	0.028035	0.145483	0.0512335	0.00702652	0.000427261	0.00815018	0.00227263	0.523425	0.184901	0.60713	0.27073	0.0452341	0.0163078	0.0524678	0.0236996
250	331.517	SS10	21	1	49.983	-145.086	2	2018-08-17 04:25:00	2018-08-17 04:25:00	1038.87	407.665	0.929393	0.148976	0.965517	0.409271	0.108221	0.0302874	0.112428	0.0541887	0.0070891	0.0003921	0.00736464	0.00291854	0.521982	0.188324	0.54227	0.289064	0.0452341	0.0163078	0.0469922	0.0250413
251	498.903	SS10	21	1	49.983	-145.086	1	2018-08-17 04:25:00	2018-08-17 04:25:00	504.614	469.86	0.876803	0.158282	0.442447	0.419646	0.120949	0.0504373	0.0610325	0.0622681	0.00803236	0.00133428	0.00405325	0.00383368	0.802252	0.183303	0.404828	0.388129	0.0452341	0.0163078	0.0228258	0.0227912
319	4.658	SS11	22	1	50.046	-145.03	23	2018-08-17 06:14:00	2018-08-17 06:14:00	253.523	17.4465	5.30452	1.89986	1.34482	0.490469	0.798586	0.358632	0.20246	0.0919828	0.184484	0.077162	0.0467711	0.0198254	0.784293	0.237113	0.198836	0.0616513	0.0452341	0.0163078	0.0114679	0.00420905
318	15.324	SS11	22	1	50.046	-145.03	21	2018-08-17 06:14:00	2018-08-17 06:14:00	507.099	24.1472	5.30452	1.89986	2.68992	0.971895	0.798586	0.358632	0.404962	0.182881	0.184484	0.077162	0.0935519	0.0393815	0.784293	0.237113	0.397714	0.121722	0.0452341	0.0163078	0.0229381	0.0083415
317	24.324	SS11	22	1	50.046	-145.03	19	2018-08-17 06:14:00	2018-08-17 06:14:00	938.842	39.1086	5.30452	1.89986	4.98011	1.79569	0.798586	0.358632	0.749747	0.338144	0.184484	0.077162	0.173202	0.0728013	0.784293	0.237113	0.736327	0.224715	0.0452341	0.0163078	0.0424676	0.0154123
316	50.207	SS11	22	1	50.046	-145.03	17	2018-08-17 06:14:00	2018-08-17 06:14:00	1514.42	68.5743	5.30452	1.89986	8.03328	2.90009	0.798586	0.358632	1.2094	0.545873	0.184484	0.077162	0.279387	0.117538	0.784293	0.237113	1.18775	0.363094	0.0452341	0.0163078	0.0685034	0.0248909
315	75.537	SS11	22	1	50.046	-145.03	15	2018-08-17 06:14:00	2018-08-17 06:14:00	1488.71	92.8634	3.42182	0.884014	5.0941	1.35386	0.508478	0.152994	0.756976	0.232606	0.103682	0.0309728	0.154352	0.047104	0.682906	0.191293	1.01665	0.291756	0.0452341	0.0163078	0.0673403	0.0246383
314	94.944	SS11	22	1	50.046	-145.03	13	2018-08-17 06:14:00	2018-08-17 06:14:00	1489.35	102.23	1.99153	0.363422	2.96608	0.578286	0.287238	0.0540941	0.427799	0.0857496	0.0415792	0.00870908	0.061926	0.0136496	0.607218	0.159486	0.904361	0.245508	0.0452341	0.0163078	0.0673694	0.0247243
313	110.409	SS11	22	1	50.046	-145.03	11	2018-08-17 06:14:00	2018-08-17 06:14:00	1425.48	111.286	1.51137	0.275722	2.15443	0.427513	0.202041	0.0332293	0.288006	0.0524334	0.0185773	0.00427522	0.0264817	0.00643538	0.576768	0.164229	0.822174	0.242746	0.0452341	0.0163078	0.0644804	0.0237853
312	124.89	SS11	22	1	50.046	-145.03	9	2018-08-17 06:14:00	2018-08-17 06:14:00	1570.97	125.913	1.36511	0.28654	2.14455	0.481846	0.171631	0.0304647	0.269627	0.052512	0.014233	0.00399684	0.0223596	0.00652965	0.557943	0.177452	0.87651	0.287487	0.0452341	0.0163078	0.0710612	0.0262445
311 avg	150.22	SS11	22	1	50.046	-145.03	7	2018-08-17 06:14:00	2018-08-17 06:14:00	1563.86	127.66	1.11696	0.287669	1.74677	0.471931	0.12436	0.0256419	0.194481	0.0431287	0.00948847	0.00344978	0.0148386	0.00552928	0.526488	0.194504	0.823354	0.311514	0.0452341	0.0163078	0.0707397	0.0261487
310	196.156	SS11	22	1	50.046	-145.03	5	2018-08-17 06:14:00	2018-08-17 06:14:00	2089.01	267.974	1.03362	0.0763088	2.15924	0.31958	0.125846	0.0162511	0.262894	0.0478518	0.00922691	0.00260493	0.0192751	0.00597713	0.534403	0.203876	1.11637	0.449331	0.0452341	0.0163078	0.0944944	0.0361594
309	329.167	SS11	22	1	50.046	-145.03	3	2018-08-17 06:14:00	2018-08-17 06:14:00	2164.63	463.313	0.939781	0.150368	2.03428	0.543627	0.10761	0.0289389	0.232936	0.080061	0.00702652	0.000427261	0.0152099	0.00338431	0.521982	0.188324	1.1299	0.473992	0.0452341	0.0163078	0.0979152	0.0410529
308	499.199	SS11	22	1	50.046	-145.03	1	2018-08-17 06:14:00	2018-08-17 06:14:00	2821.74	514.615	0.876803	0.158282	2.47411	0.634881	0.120949	0.0504373	0.341286	0.155336	0.00803236	0.00133428	0.0226653	0.00559121	0.802252	0.183303	2.26375	0.661799	0.0452341	0.0163078	0.127639	0.0515692
321	6.024	SS9	23	1	50.019	-145.182	17	2018-08-17 17:15:00	2018-08-17 17:15:00	322.865	24.8387	5.30452	1.89986	1.71265	0.62739	0.798586	0.358632	0.257836	0.117476	0.184484	0.077162	0.0595636	0.0253308	0.784293	0.237113	0.253221	0.0789953	0.0452341	0.0163078	0.0146045	0.00538377
322	19.961	SS9	23	1	50.019	-145.182	16	2018-08-17 17:15:00	2018-08-17 17:15:00	627.735	36.5694	5.30452	1.89986	3.32983	1.20828	0.798586	0.358632	0.5013	0.227012	0.184484	0.077162	0.115807	0.0489048	0.784293	0.237113	0.492328	0.151582	0.0452341	0.0163078	0.028395	0.0103698
323	34.844	SS9	23	1	50.019	-145.182	15	2018-08-17 17:15:00	2018-08-17 17:15:00	1028.05	46.1163	5.30452	1.89986	5.45334	1.96842	0.798586	0.358632	0.82099	0.370527	0.184484	0.077162	0.18966	0.0797816	0.784293	0.237113	0.806295	0.246434	0.0452341	0.0163078	0.046503	0.0168946
324	50.017	SS9	23	1	50.019	-145.182	14	2018-08-17 17:15:00	2018-08-17 17:15:00	1237.97	56.1767	5.30452	1.89986	6.56687	2.37078	0.798586	0.358632	0.98863	0.446238	0.184484	0.077162	0.228387	0.0960851	0.784293	0.237113	0.970935	0.296828	0.0452341	0.0163078	0.0559986	0.020348
325	65.896	SS9	23	1	50.019	-145.182	13	2018-08-17 17:15:00	2018-08-17 17:15:00	1400.95	68.3002	4.13236	1.22331	5.78924	1.73689	0.618386	0.220642	0.866328	0.311981	0.134533	0.0461553	0.188474	0.0653109	0.720506	0.208077	1.00939	0.295631	0.0452341	0.0163078	0.0633707	0.0230544
326	80.382	SS9	23	1	50.019	-145.182	12	2018-08-17 17:15:00	2018-08-17 17:15:00	1474.47	79.4645	3.06475	0.733721	4.51888	1.10892	0.453245	0.123638	0.668296	0.185825	0.0881776	0.0243761	0.130015	0.0366184	0.66401	0.183105	0.979063	0.275091	0.0452341	0.0163078	0.0666962	0.0243126
327	95.602	SS9	23	1	50.019	-145.182	11	2018-08-17 17:15:00	2018-08-17 17:15:00	1462.77	88.7335	1.94303	0.349574	2.84222	0.539633	0.279737	0.0516139	0.409192	0.0794752	0.0394736	0.00814857	0.057741	0.0124235	0.604652	0.158454	0.88447	0.237911	0.0452341	0.0163078	0.0661672	0.02419
328	110.598	SS9	23	1	50.019	-145.182	10	2018-08-17 17:15:00	2018-08-17 17:15:00	1369.15	98.9394	1.50946	0.275915	2.06668	0.406218	0.201644	0.0331983	0.276081	0.0496391	0.0185206	0.00427442	0.0253575	0.0061325	0.576523	0.16441	0.789346	0.232217	0.0452341	0.0163078	0.0619322	0.022772
329	126.473	SS9	23	1	50.019	-145.182	9	2018-08-17 17:15:00	2018-08-17 17:15:00	1348.91	109.642	1.34912	0.287235	1.81984	0.41473	0.168307	0.0301144	0.22703	0.0446165	0.0137581	0.00393971	0.0185584	0.00552424	0.555885	0.178822	0.749836	0.248794	0.0452341	0.0163078	0.0610164	0.0225499
330	145.819	SS9	23	1	50.019	-145.182	8	2018-08-17 17:15:00	2018-08-17 17:15:00	1411.11	149.123	1.15373	0.287976	1.62804	0.441287	0.12768	0.0250683	0.180171	0.0401729	0.00948847	0.00344978	0.0133893	0.0050695	0.530735	0.194347	0.748928	0.285437	0.0452341	0.0163078	0.0638304	0.0239805
331	195.957	SS9	23	1	50.019	-145.182	7	2018-08-17 17:15:00	2018-08-17 17:15:00	1498.19	178.912	1.03398	0.0771546	1.5491	0.218136	0.125838	0.0162927	0.18853	0.033207	0.0092283	0.00260863	0.0138258	0.00424267	0.534403	0.203876	0.800639	0.32006	0.0452341	0.0163078	0.0677693	0.0257377
332	220.613	SS9	23	1	50.019	-145.182	6	2018-08-17 17:15:00	2018-08-17 17:15:00	1601.51	192.644	1.00687	0.0749542	1.61251	0.228108	0.133439	0.0180642	0.213703	0.0387007	0.00788774	0.00194369	0.0126323	0.00346391	0.531439	0.196248	0.851102	0.330547	0.0452341	0.0163078	0.0724426	0.0275325
333	250.297	SS9	23	1	50.019	-145.182	5	2018-08-17 17:15:00	2018-08-17 17:15:00	1660.17	208.729	0.986092	0.0962682	1.63708	0.26059	0.13047	0.0219225	0.216603	0.0454558	0.00729406	0.00145097	0.0121094	0.00284966	0.52847	0.192015	0.87735	0.337322	0.0452341	0.0163078	0.0750962	0.0286729
334	275.105	SS9	23	1	50.019	-145.182	4	2018-08-17 17:15:00	2018-08-17 17:15:00	1690.55	221.383	0.968727	0.113342	1.63768	0.287589	0.12799	0.0249983	0.216372	0.0508806	0.0067979	0.00108244	0.0114922	0.00236927	0.525989	0.188504	0.889209	0.339282	0.0452341	0.0163078	0.0764702	0.0293315
335	300.252	SS9	23	1	50.019	-145.182	3	2018-08-17 17:15:00	2018-08-17 17:15:00	1633.78	237.124	0.951124	0.129962	1.55393	0.309757	0.125475	0.027978	0.204998	0.0545403	0.00702652	0.000427261	0.0114798	0.00180647	0.523475	0.18497	0.855242	0.326699	0.0452341	0.0163078	0.0739024	0.0287214
336	331.219	SS9	23	1	50.019	-145.182	2	2018-08-17 17:15:00	2018-08-17 17:15:00	2498.02	340.322	0.929512	0.148961	2.32194	0.488397	0.108198	0.0302517	0.270279	0.084063	0.00708731	0.000390734	0.0177042	0.00260198	0.521982	0.188324	1.30392	0.502861	0.0452341	0.0163078	0.112996	0.0435489
337	499.39	SS9	23	1	50.019	-145.182	1	2018-08-17 17:15:00	2018-08-17 17:15:00	2393.26	410.604	0.876803	0.158282	2.09841	0.522599	0.120949	0.0504373	0.289461	0.130526	0.00803236	0.00133428	0.0192235	0.00459071	0.802252	0.183303	1.91999	0.548598	0.0452341	0.0163078	0.108257	0.0432228
338	5.918	SS8	24	1	50.083	-145.125	17	2018-08-17 19:39:00	2018-08-17 19:39:00	424.387	45.952	5.30452	1.89986	2.25117	0.842316	0.798586	0.358632	0.338909	0.15656	0.184484	0.077162	0.0782927	0.033826	0.784293	0.237113	0.332843	0.106887	0.0452341	0.0163078	0.0191967	0.00722622
340	35.554	SS8	24	1	50.083	-145.125	15	2018-08-17 19:39:00	2018-08-17 19:39:00	796.501	64.4675	5.30452	1.89986	4.22506	1.5514	0.798586	0.358632	0.636075	0.290253	0.184484	0.077162	0.146942	0.0625998	0.784293	0.237113	0.62469	0.195512	0.0452341	0.0163078	0.036029	0.0133125
341	50.716	SS8	24	1	50.083	-145.125	14	2018-08-17 19:39:00	2018-08-17 19:39:00	1017.94	73.0836	5.25113	1.8661	5.34535	1.93796	0.791438	0.352069	0.805639	0.363024	0.183109	0.0756068	0.186394	0.0781182	0.779708	0.235827	0.793698	0.246729	0.0452341	0.0163078	0.0460457	0.0169264
342	65.67	SS8	24	1	50.083	-145.125	13	2018-08-17 19:39:00	2018-08-17 19:39:00	1222.17	81.3013	4.14902	1.23191	5.07081	1.54293	0.620962	0.222375	0.758921	0.27643	0.135256	0.046544	0.165306	0.0579379	0.721387	0.208479	0.881658	0.261459	0.0452341	0.0163078	0.0552837	0.0202674
343	80.495	SS8	24	1	50.083	-145.125	12	2018-08-17 19:39:00	2018-08-17 19:39:00	1268.25	88.8377	3.05642	0.730377	3.8763	0.965275	0.451957	0.122991	0.573194	0.161067	0.087816	0.0242305	0.111372	0.031705	0.66357	0.182916	0.841571	0.239356	0.0452341	0.0163078	0.057368	0.0210691
344	95.648	SS8	24	1	50.083	-145.125	11	2018-08-17 19:39:00	2018-08-17 19:39:00	1339.67	96.5274	1.93964	0.348616	2.59848	0.503161	0.279213	0.0514426	0.374053	0.0739988	0.0393264	0.00810986	0.0526844	0.0115086	0.604473	0.158382	0.809794	0.220056	0.0452341	0.0163078	0.0605987	0.0222791
345	109.157	SS8	24	1	50.083	-145.125	10	2018-08-17 19:39:00	2018-08-17 19:39:00	1206.71	106.167	1.52401	0.274409	1.83905	0.368549	0.20467	0.0334311	0.246978	0.0458216	0.0189529	0.00427861	0.0228707	0.00554129	0.578396	0.163027	0.697958	0.206088	0.0452341	0.0163078	0.0545846	0.0202564
346	125.401	SS8	24	1	50.083	-145.125	9	2018-08-17 19:39:00	2018-08-17 19:39:00	1239.49	116.791	1.35995	0.286775	1.68564	0.389325	0.170558	0.0303526	0.211404	0.0425697	0.0140797	0.00397897	0.0174516	0.00519879	0.557279	0.177896	0.690739	0.229904	0.0452341	0.0163078	0.056067	0.0208923
347	145.43	SS8	24	1	50.083	-145.125	8	2018-08-17 19:39:00	2018-08-17 19:39:00	1090.58	148.414	1.15766	0.288102	1.26252	0.358107	0.128497	0.0251837	0.140137	0.0334368	0.00948847	0.00344978	0.010348	0.00401718	0.531241	0.194056	0.579362	0.225844	0.0452341	0.0163078	0.0493315	0.0190099
348	195.115	SS8	24	1	50.083	-145.125	7	2018-08-17 19:39:00	2018-08-17 19:39:00	1055.24	186.472	1.03549	0.0807395	1.09269	0.211051	0.125805	0.0164684	0.132754	0.0291945	0.0092342	0.00262429	0.00974426	0.00326094	0.534403	0.203876	0.563922	0.237096	0.0452341	0.0163078	0.0477326	0.0191646
349	220.35	SS8	24	1	50.083	-145.125	6	2018-08-17 19:39:00	2018-08-17 19:39:00	1131.7	201.799	1.00706	0.0747611	1.13969	0.220132	0.133465	0.0180291	0.151043	0.0337891	0.007893	0.00194831	0.00893253	0.00272004	0.531465	0.196286	0.601461	0.246673	0.0452341	0.0163078	0.0511915	0.0205896
350	249.774	SS8	24	1	50.083	-145.125	5	2018-08-17 19:39:00	2018-08-17 19:39:00	1137.05	218.584	0.986458	0.095901	1.12165	0.241628	0.130523	0.0218562	0.148411	0.0378361	0.00730452	0.00145916	0.00830561	0.00230262	0.528523	0.192089	0.600957	0.247086	0.0452341	0.0163078	0.0514334	0.0210142
351	274.824	SS8	24	1	50.083	-145.125	4	2018-08-17 19:39:00	2018-08-17 19:39:00	1065.37	231.134	0.968923	0.113152	1.03226	0.254335	0.128018	0.0249643	0.136386	0.0397854	0.00680352	0.0010864	0.00724825	0.00195255	0.526018	0.188543	0.560402	0.234797	0.0452341	0.0163078	0.0481909	0.0202771
352	299.988	SS8	24	1	50.083	-145.125	3	2018-08-17 19:39:00	2018-08-17 19:39:00	937.018	247.955	0.951308	0.129791	0.891393	0.265388	0.125501	0.0279475	0.117597	0.0406711	0.00702652	0.000427261	0.00658398	0.00178766	0.523501	0.185007	0.49053	0.216566	0.0452341	0.0163078	0.0423851	0.0189552
353	329.549	SS8	24	1	50.083	-145.125	2	2018-08-17 19:39:00	2018-08-17 19:39:00	1196.5	393.988	0.939781	0.150368	1.12445	0.41166	0.10761	0.0289389	0.128755	0.0547396	0.00702652	0.000427261	0.00840727	0.00281517	0.521982	0.188324	0.624554	0.30507	0.0452341	0.0163078	0.0541228	0.0264262
354	499.257	SS8	24	1	50.083	-145.125	1	2018-08-17 19:39:00	2018-08-17 19:39:00	1657.42	467.407	0.876803	0.158282	1.45323	0.486598	0.120949	0.0504373	0.200463	0.100917	0.00803236	0.00133428	0.013313	0.00435729	0.802252	0.183303	1.32967	0.482607	0.0452341	0.0163078	0.0749719	0.0343159
387	8.01	LS3	28	1	50.025	-145.455	13	2018-08-20 04:43:00	2018-08-20 04:43:00	552.603	21.8694	5.30452	1.89986	2.93129	1.05626	0.798586	0.358632	0.441301	0.198949	0.184484	0.077162	0.101947	0.0428303	0.784293	0.237113	0.433402	0.132147	0.0452341	0.0163078	0.0249965	0.00906587
388	22.043	LS3	28	1	50.025	-145.455	12	2018-08-20 04:43:00	2018-08-20 04:43:00	977.915	32.7481	5.30452	1.89986	5.18737	1.86601	0.798586	0.358632	0.78095	0.351685	0.184484	0.077162	0.18041	0.0756993	0.784293	0.237113	0.766972	0.233295	0.0452341	0.0163078	0.0442351	0.0160163
389	35.903	LS3	28	1	50.025	-145.455	11	2018-08-20 04:43:00	2018-08-20 04:43:00	1318.81	43.8218	5.30452	1.89986	6.99567	2.51632	0.798586	0.358632	1.05319	0.474261	0.184484	0.077162	0.2433	0.102083	0.784293	0.237113	1.03433	0.314591	0.0452341	0.0163078	0.0596552	0.0215981
390	50.676	LS3	28	1	50.025	-145.455	10	2018-08-20 04:43:00	2018-08-20 04:43:00	1633.43	53.0906	5.25408	1.86797	8.58216	3.06392	0.791894	0.352455	1.2935	0.577244	0.183237	0.0756934	0.299304	0.124022	0.779864	0.235902	1.27385	0.387547	0.0452341	0.0163078	0.0738866	0.0267457
391	65.719	LS3	28	1	50.025	-145.455	9	2018-08-20 04:43:00	2018-08-20 04:43:00	1956.39	61.5617	4.14541	1.23004	8.11002	2.41994	0.620403	0.221999	1.21375	0.435992	0.135099	0.0464596	0.264306	0.0912727	0.721196	0.208392	1.41094	0.410105	0.0452341	0.0163078	0.0884953	0.0320257
392	80.298	LS3	28	1	50.025	-145.455	8	2018-08-20 04:43:00	2018-08-20 04:43:00	2081.63	72.3558	3.07094	0.736212	6.39256	1.54854	0.454203	0.124121	0.945482	0.260455	0.0884464	0.0244845	0.184113	0.051368	0.664338	0.183245	1.38291	0.384466	0.0452341	0.0163078	0.0941606	0.0341043
393	95.948	LS3	28	1	50.025	-145.455	7	2018-08-20 04:43:00	2018-08-20 04:43:00	2385.09	80.4658	1.91753	0.342393	4.57348	0.831087	0.275793	0.0503326	0.65779	0.122082	0.0383664	0.00785894	0.0915073	0.0189968	0.603303	0.157913	1.43893	0.379751	0.0452341	0.0163078	0.107887	0.0390655
394	112.977	LS3	28	1	50.025	-145.455	6	2018-08-20 04:43:00	2018-08-20 04:43:00	2476.12	90.6693	1.48543	0.278226	3.67811	0.701964	0.196648	0.0327969	0.486925	0.0831433	0.0178069	0.00425798	0.044092	0.0106662	0.57343	0.166666	1.41988	0.415947	0.0452341	0.0163078	0.112005	0.0405879
395	127.175	LS3	28	1	50.025	-145.455	5	2018-08-20 04:43:00	2018-08-20 04:43:00	2453.57	102.007	1.34203	0.287513	3.29277	0.718594	0.166833	0.029956	0.409336	0.0754437	0.0135475	0.00391269	0.0332398	0.00969902	0.554973	0.179424	1.36167	0.443855	0.0452341	0.0163078	0.110985	0.0402776
396	145.353	LS3	28	1	50.025	-145.455	4	2018-08-20 04:43:00	2018-08-20 04:43:00	2435.63	143.201	1.15843	0.288127	2.82152	0.721111	0.128659	0.0252065	0.313365	0.0640987	0.00948847	0.00344978	0.0231104	0.00851154	0.531341	0.193999	1.29415	0.478597	0.0452341	0.0163078	0.110174	0.0402446
397	195.482	LS3	28	1	50.025	-145.455	3	2018-08-20 04:43:00	2018-08-20 04:43:00	1819.27	294.866	1.03483	0.0791757	1.88264	0.337427	0.125819	0.0163918	0.228899	0.0475993	0.00923163	0.00261747	0.0167948	0.005485	0.534403	0.203876	0.972222	0.402991	0.0452341	0.0163078	0.0822929	0.0325286
398	314.061	LS3	28	1	50.025	-145.455	2	2018-08-20 04:43:00	2018-08-20 04:43:00	1966.09	527.676	0.941457	0.138795	1.85099	0.566798	0.124094	0.0295551	0.243979	0.0875462	0.00702652	0.000427261	0.0138148	0.0038017	0.522094	0.18304	1.02648	0.453218	0.0452341	0.0163078	0.0889341	0.0399717
399	502.624	LS3	28	1	50.025	-145.455	1	2018-08-20 04:43:00	2018-08-20 04:43:00	1724.21	601.375	0.876803	0.158282	1.51179	0.593727	0.120949	0.0504373	0.208541	0.113372	0.00803236	0.00133428	0.0138495	0.00535033	0.802252	0.183303	1.38325	0.576759	0.0452341	0.0163078	0.0779929	0.039123
400	7.382	LS7	37	2	49.99	-145.059	13	2018-08-21 10:57:00	2018-08-21 10:57:00	410.364	27.8278	5.30452	1.89986	2.17679	0.793487	0.798586	0.358632	0.327712	0.148838	0.184484	0.077162	0.0757059	0.032078	0.784293	0.237113	0.321846	0.0997204	0.0452341	0.0163078	0.0185624	0.0068095
401	22.571	LS7	37	2	49.99	-145.059	12	2018-08-21 10:57:00	2018-08-21 10:57:00	821.868	38.1683	5.30452	1.89986	4.35962	1.57451	0.798586	0.358632	0.656332	0.29632	0.184484	0.077162	0.151622	0.0638067	0.784293	0.237113	0.644585	0.197161	0.0452341	0.0163078	0.0371764	0.0135136
402	36.664	LS7	37	2	49.99	-145.059	11	2018-08-21 10:57:00	2018-08-21 10:57:00	1280.28	44.9642	5.30452	1.89986	6.7913	2.44403	0.798586	0.358632	1.02242	0.460553	0.184484	0.077162	0.236193	0.099137	0.784293	0.237113	1.00412	0.305614	0.0452341	0.0163078	0.0579125	0.0209775
403	51.54	LS7	37	2	49.99	-145.059	10	2018-08-21 10:57:00	2018-08-21 10:57:00	1683.09	51.8721	5.1904	1.8278	8.73593	3.08812	0.782044	0.344153	1.31625	0.580659	0.180472	0.073834	0.303751	0.124622	0.776494	0.234279	1.30691	0.396365	0.0452341	0.0163078	0.0761331	0.0275477
404	67.421	LS7	37	2	49.99	-145.059	9	2018-08-21 10:57:00	2018-08-21 10:57:00	1977.86	60.1305	4.01997	1.16608	7.95093	2.31897	0.601001	0.209123	1.18869	0.415191	0.129653	0.0435716	0.256435	0.0865302	0.714558	0.205379	1.41329	0.408476	0.0452341	0.0163078	0.0894664	0.032369
405	82.435	LS7	37	2	49.99	-145.059	8	2018-08-21 10:57:00	2018-08-21 10:57:00	2047.65	71.2837	2.91344	0.674116	5.96572	1.39589	0.429841	0.112136	0.880166	0.23165	0.081608	0.0217893	0.167105	0.0449945	0.656003	0.179685	1.34327	0.370892	0.0452341	0.0163078	0.0926237	0.0335481
406	97.869	LS7	37	2	49.99	-145.059	7	2018-08-21 10:57:00	2018-08-21 10:57:00	2107.52	80.1242	1.77595	0.303777	3.74286	0.65584	0.253893	0.0435071	0.535086	0.0939218	0.0322192	0.00631505	0.0679027	0.0135572	0.595811	0.154921	1.25569	0.329972	0.0452341	0.0163078	0.0953318	0.0345597
407	114.277	LS7	37	2	49.99	-145.059	6	2018-08-21 10:57:00	2018-08-21 10:57:00	2169.92	88.749	1.4723	0.279398	3.19478	0.620192	0.193918	0.0325684	0.420787	0.0727362	0.0174169	0.00424397	0.0377933	0.00933789	0.57174	0.167884	1.24063	0.367812	0.0452341	0.0163078	0.0981542	0.0356136
408	129.972	LS7	37	2	49.99	-145.059	5	2018-08-21 10:57:00	2018-08-21 10:57:00	2157.23	98.8188	1.31378	0.288432	2.83414	0.635614	0.160959	0.0293065	0.347226	0.0651912	0.0127084	0.00379475	0.027415	0.00828193	0.551336	0.181795	1.18936	0.395941	0.0452341	0.0163078	0.0975804	0.0354626
409	148.548	LS7	37	2	49.99	-145.059	4	2018-08-21 10:57:00	2018-08-21 10:57:00	2084.71	137.623	1.12617	0.286926	2.34773	0.617912	0.121949	0.0242427	0.254229	0.0532528	0.00948847	0.00344978	0.0197808	0.00730939	0.527188	0.196357	1.09904	0.415727	0.0452341	0.0163078	0.0943001	0.0345624
410	198.552	LS7	37	2	49.99	-145.059	3	2018-08-21 10:57:00	2018-08-21 10:57:00	3130.48	251.087	1.02931	0.0661699	3.22223	0.331214	0.125942	0.0157505	0.39426	0.0585759	0.00921014	0.00256048	0.0288322	0.00834246	0.534403	0.203876	1.67294	0.652184	0.0452341	0.0163078	0.141605	0.0522995
411	333.285	LS7	37	2	49.99	-145.059	2	2018-08-21 10:57:00	2018-08-21 10:57:00	4793.08	427.193	0.928686	0.149061	4.45127	0.81722	0.108363	0.0304994	0.519392	0.153341	0.00709971	0.000400218	0.0340295	0.00358867	0.521982	0.188324	2.5019	0.929789	0.0452341	0.0163078	0.21681	0.0805178
412	502.541	LS7	37	2	49.99	-145.059	1	2018-08-21 10:57:00	2018-08-21 10:57:00	5063.19	482.096	0.876803	0.158282	4.43942	0.906055	0.120949	0.0504373	0.612386	0.261946	0.00803236	0.00133428	0.0406694	0.00778684	0.802252	0.183303	4.06195	1.00546	0.0452341	0.0163078	0.229028	0.0854007
413	8.311	LS8	38	2	49.936	-144.826	13	2018-08-21 13:02:00	2018-08-21 13:02:00	507.829	23.4968	5.30452	1.89986	2.69379	0.972823	0.798586	0.358632	0.405546	0.183088	0.184484	0.077162	0.0936866	0.0394241	0.784293	0.237113	0.398287	0.121815	0.0452341	0.0163078	0.0229712	0.00834951
414	22.073	LS8	38	2	49.936	-144.826	12	2018-08-21 13:02:00	2018-08-21 13:02:00	744.648	36.7465	5.30452	1.89986	3.95	1.42809	0.798586	0.358632	0.594666	0.268662	0.184484	0.077162	0.137376	0.057857	0.784293	0.237113	0.584022	0.178902	0.0452341	0.0163078	0.0336834	0.0122568
415	37.263	LS8	38	2	49.936	-144.826	11	2018-08-21 13:02:00	2018-08-21 13:02:00	1044.88	46.8845	5.30452	1.89986	5.54258	2.00064	0.798586	0.358632	0.834426	0.376593	0.184484	0.077162	0.192764	0.0810875	0.784293	0.237113	0.819491	0.250468	0.0452341	0.0163078	0.0472641	0.0171712
416	53.185	LS8	38	2	49.936	-144.826	10	2018-08-21 13:02:00	2018-08-21 13:02:00	1323.16	55.4096	5.06917	1.75251	6.70733	2.33581	0.763291	0.328617	1.00996	0.436867	0.175208	0.0703546	0.231829	0.0935955	0.770078	0.231203	1.01894	0.308881	0.0452341	0.0163078	0.059852	0.021723
417	67.871	LS8	38	2	49.936	-144.826	9	2018-08-21 13:02:00	2018-08-21 13:02:00	1430.12	63.7102	3.98681	1.14945	5.7016	1.66335	0.595871	0.205783	0.852165	0.296732	0.128213	0.0428222	0.183359	0.0617832	0.712803	0.204586	1.01939	0.296085	0.0452341	0.0163078	0.06469	0.0234995
418	82.008	LS8	38	2	49.936	-144.826	8	2018-08-21 13:02:00	2018-08-21 13:02:00	1473.96	72.9428	2.94491	0.686314	4.34069	1.03416	0.434709	0.114482	0.640745	0.171696	0.0829744	0.0223171	0.122301	0.0334467	0.657669	0.180394	0.96938	0.270187	0.0452341	0.0163078	0.0666734	0.0242625
419	97.611	LS8	38	2	49.936	-144.826	7	2018-08-21 13:02:00	2018-08-21 13:02:00	1507.55	82.9212	1.79497	0.30884	2.706	0.488802	0.256835	0.0443955	0.38719	0.0702349	0.0330448	0.00651608	0.0498165	0.0101983	0.596817	0.155322	0.899729	0.239327	0.0452341	0.0163078	0.0681924	0.0248693
420	112.96	LS8	38	2	49.936	-144.826	6	2018-08-21 13:02:00	2018-08-21 13:02:00	1359.19	92.436	1.4856	0.278211	2.01922	0.402304	0.196684	0.0327998	0.267331	0.0481458	0.017812	0.00425814	0.0242099	0.00601726	0.573452	0.16665	0.779431	0.232629	0.0452341	0.0163078	0.0614817	0.0225564
421	127.716	LS8	38	2	49.936	-144.826	5	2018-08-21 13:02:00	2018-08-21 13:02:00	1221.91	103.975	1.33657	0.287714	1.63317	0.378032	0.165696	0.0298327	0.202467	0.0403191	0.0133852	0.00389116	0.0163556	0.00495416	0.554269	0.179886	0.677269	0.227235	0.0452341	0.0163078	0.0552721	0.0204743
422	147.192	LS8	38	2	49.936	-144.826	4	2018-08-21 13:02:00	2018-08-21 13:02:00	1432.5	132.916	1.13986	0.287483	1.63285	0.438803	0.124797	0.0246565	0.178771	0.0390213	0.00948847	0.00344978	0.0135922	0.00510018	0.52895	0.195363	0.757719	0.288553	0.0452341	0.0163078	0.0647976	0.0241221
423	197.39	LS8	38	2	49.936	-144.826	3	2018-08-21 13:02:00	2018-08-21 13:02:00	-210.346	499.642	1.0314	0.0710768	-0.216951	-0.515547	0.125896	0.0159934	-0.0264817	-0.0629926	0.00921827	0.00258202	-0.00193903	-0.00463775	0.534403	0.203876	-0.11241	-0.270432	0.0452341	0.0163078	-0.00951482	-0.0228597
425	503.405	LS8	38	2	49.936	-144.826	1	2018-08-21 13:02:00	2018-08-21 13:02:00	-9.22281	513.607	0.876803	0.158282	-0.00808659	-0.450335	0.120949	0.0504373	-0.00111549	-0.0621219	0.00803236	0.00133428	-7.4081e-05	-0.0041255	0.802252	0.183303	-0.00739901	-0.412046	0.0452341	0.0163078	-0.000417185	-0.023233
436	4.954	LS9	39	2	50.099	-144.944	23	2018-08-21 16:29:00	2018-08-21 16:29:00	259.086	17.8991	5.30452	1.89986	1.37433	0.501301	0.798586	0.358632	0.206903	0.0940096	0.184484	0.077162	0.0477974	0.0202625	0.784293	0.237113	0.2032	0.0630163	0.0452341	0.0163078	0.0117195	0.00430201
435	15.087	LS9	39	2	50.099	-144.944	19	2018-08-21 16:29:00	2018-08-21 16:29:00	555.637	24.5377	5.30452	1.89986	2.94739	1.06363	0.798586	0.358632	0.443724	0.20023	0.184484	0.077162	0.102506	0.0431123	0.784293	0.237113	0.435782	0.133147	0.0452341	0.0163078	0.0251337	0.00912895
434	24.957	LS9	39	2	50.099	-144.944	16	2018-08-21 16:29:00	2018-08-21 16:29:00	1028.58	42.3356	5.30452	1.89986	5.45614	1.96703	0.798586	0.358632	0.821412	0.370428	0.184484	0.077162	0.189758	0.0797508	0.784293	0.237113	0.80671	0.24614	0.0452341	0.0163078	0.046527	0.0168829
433	50.751	LS9	39	2	50.099	-144.944	13	2018-08-21 16:29:00	2018-08-21 16:29:00	1422.07	67.475	5.24855	1.86447	7.4638	2.67494	0.791039	0.351731	1.12491	0.503025	0.182997	0.0755311	0.260234	0.108118	0.779571	0.235761	1.1086	0.33937	0.0452341	0.0163078	0.0643259	0.0233908
432	75.427	LS9	39	2	50.099	-144.944	11	2018-08-21 16:29:00	2018-08-21 16:29:00	1437.27	86.9034	3.42993	0.887583	4.92972	1.31005	0.509732	0.153696	0.732621	0.2253	0.104034	0.0311306	0.149524	0.0456472	0.683335	0.191481	0.982134	0.281543	0.0452341	0.0163078	0.0650134	0.023766
431	95.434	LS9	39	2	50.099	-144.944	9	2018-08-21 16:29:00	2018-08-21 16:29:00	1533.26	97.9835	1.95541	0.353086	2.99816	0.574277	0.281652	0.0522417	0.431846	0.0847208	0.0400112	0.00829046	0.0613475	0.0133023	0.605307	0.158717	0.928093	0.250478	0.0452341	0.0163078	0.0693555	0.0253939
430	110.978	LS9	39	2	50.099	-144.944	7	2018-08-21 16:29:00	2018-08-21 16:29:00	1632.2	104.88	1.50562	0.276299	2.45747	0.477821	0.200846	0.0331356	0.327821	0.0580414	0.0184066	0.0042726	0.0300432	0.00723599	0.576029	0.164773	0.940193	0.275644	0.0452341	0.0163078	0.0738309	0.0270371
429	127.339	LS9	39	2	50.099	-144.944	6	2018-08-21 16:29:00	2018-08-21 16:29:00	1621.54	116.696	1.34038	0.287575	2.17347	0.491849	0.166488	0.0299188	0.269967	0.0522601	0.0134983	0.00390623	0.021888	0.00652703	0.554759	0.179564	0.899565	0.298281	0.0452341	0.0163078	0.0733489	0.0269655
428	150.987	LS9	39	2	50.099	-144.944	5	2018-08-21 16:29:00	2018-08-21 16:29:00	1648.17	145.043	1.11492	0.282845	1.83759	0.493428	0.124039	0.0255425	0.204438	0.0457815	0.00948847	0.00344978	0.0156386	0.00585001	0.526488	0.194504	0.867743	0.329545	0.0452341	0.0163078	0.0745535	0.0276672
427	196.213	LS9	39	2	50.099	-144.944	3	2018-08-21 16:29:00	2018-08-21 16:29:00	1247.77	294.306	1.03352	0.0760667	1.28959	0.318634	0.125849	0.0162392	0.15703	0.0422184	0.00922651	0.00260387	0.0115126	0.00423435	0.534403	0.203876	0.666814	0.299084	0.0452341	0.0163078	0.0564418	0.0243164
426	328.325	LS9	39	2	50.099	-144.944	2	2018-08-21 16:29:00	2018-08-21 16:29:00	1707.29	334.726	0.939781	0.150368	1.60448	0.406031	0.10761	0.0289389	0.183721	0.0611433	0.00702652	0.000427261	0.0119963	0.00246249	0.521982	0.188324	0.891176	0.365932	0.0452341	0.0163078	0.0772278	0.0316929
437	4.797	LS10	40	2	50.26	-145.063	13	2018-08-21 19:32:00	2018-08-21 19:32:00	248	23.4098	5.30452	1.89986	1.31552	0.487255	0.798586	0.358632	0.19805	0.0908844	0.184484	0.077162	0.0457522	0.0196175	0.784293	0.237113	0.194505	0.0616037	0.0452341	0.0163078	0.0112181	0.00418068
438	19.843	LS10	40	2	50.26	-145.063	12	2018-08-21 19:32:00	2018-08-21 19:32:00	594.195	35.1768	5.30452	1.89986	3.15192	1.14421	0.798586	0.358632	0.474516	0.214941	0.184484	0.077162	0.10962	0.0463062	0.784293	0.237113	0.466023	0.143567	0.0452341	0.0163078	0.0268778	0.00981979
439	35.364	LS10	40	2	50.26	-145.063	11	2018-08-21 19:32:00	2018-08-21 19:32:00	951.651	44.7028	5.30452	1.89986	5.04806	1.82349	0.798586	0.358632	0.759976	0.343154	0.184484	0.077162	0.175565	0.0738929	0.784293	0.237113	0.746373	0.228356	0.0452341	0.0163078	0.043047	0.0156505
440	50.308	LS10	40	2	50.26	-145.063	10	2018-08-21 19:32:00	2018-08-21 19:32:00	1252.1	52.7218	5.30452	1.89986	6.64177	2.39519	0.798586	0.358632	0.999907	0.451011	0.184484	0.077162	0.230992	0.0971025	0.784293	0.237113	0.98201	0.299754	0.0452341	0.0163078	0.0566374	0.0205577
441	64.546	LS10	40	2	50.26	-145.063	9	2018-08-21 19:32:00	2018-08-21 19:32:00	1332.15	62.5649	4.23186	1.2751	5.63746	1.71913	0.633776	0.231096	0.844282	0.310397	0.138853	0.0484997	0.184972	0.0651901	0.725771	0.21048	0.966833	0.284043	0.0452341	0.0163078	0.0602584	0.021908
442	80.464	LS10	40	2	50.26	-145.063	8	2018-08-21 19:32:00	2018-08-21 19:32:00	1278.84	72.9616	3.0587	0.731294	3.9116	0.961467	0.45231	0.123168	0.578433	0.160932	0.0879152	0.0242704	0.11243	0.0316938	0.66369	0.182968	0.848755	0.238945	0.0452341	0.0163078	0.0578472	0.0211146
443	94.653	LS10	40	2	50.26	-145.063	7	2018-08-21 19:32:00	2018-08-21 19:32:00	1275.66	80.8422	2.01297	0.369625	2.56788	0.49881	0.290556	0.0552093	0.370652	0.0742423	0.0425104	0.00896103	0.054229	0.0119367	0.608353	0.159944	0.776055	0.209878	0.0452341	0.0163078	0.0577035	0.0211223
444	109.722	LS10	40	2	50.26	-145.063	6	2018-08-21 19:32:00	2018-08-21 19:32:00	1237.51	88.972	1.51831	0.275009	1.87892	0.366157	0.203484	0.0333408	0.251814	0.0450569	0.0187834	0.00427749	0.0232447	0.00555098	0.577661	0.163571	0.714863	0.208844	0.0452341	0.0163078	0.0559777	0.0205785
445	124.563	LS10	40	2	50.26	-145.063	5	2018-08-21 19:32:00	2018-08-21 19:32:00	1309.27	99.5227	1.36841	0.286384	1.79162	0.39892	0.172318	0.0305359	0.22561	0.0435026	0.0143311	0.00400799	0.0187632	0.0054379	0.558368	0.177167	0.731053	0.238523	0.0452341	0.0163078	0.0592234	0.0218207
446	145.77	LS10	40	2	50.26	-145.063	4	2018-08-21 19:32:00	2018-08-21 19:32:00	1337.7	134.335	1.15422	0.287992	1.54401	0.415279	0.127783	0.0250829	0.170936	0.0376895	0.00948847	0.00344978	0.0126927	0.00478757	0.530799	0.19431	0.710051	0.269532	0.0452341	0.0163078	0.0605097	0.0226455
447	195.821	LS10	40	2	50.26	-145.063	3	2018-08-21 19:32:00	2018-08-21 19:32:00	1609.5	264.728	1.03422	0.0777329	1.66458	0.301019	0.125833	0.0163211	0.202527	0.0424229	0.00922925	0.00261116	0.0148544	0.00486125	0.534403	0.203876	0.86012	0.357335	0.0452341	0.0163078	0.072804	0.0288499
448	331.466	LS10	40	2	50.26	-145.063	2	2018-08-21 19:32:00	2018-08-21 19:32:00	1798.25	314.808	0.929414	0.148973	1.67132	0.396702	0.108217	0.0302813	0.194602	0.0642322	0.0070888	0.000391866	0.0127474	0.00234022	0.521982	0.188324	0.938654	0.376416	0.0452341	0.0163078	0.0813422	0.0326001
450	5.239	LS2	43	2	50.306	-145.248	13	2018-08-22 06:32:00	2018-08-22 06:32:00	276.603	21.9241	5.30452	1.89986	1.46725	0.538223	0.798586	0.358632	0.220892	0.100732	0.184484	0.077162	0.051029	0.0217231	0.784293	0.237113	0.216938	0.0678028	0.0452341	0.0163078	0.0125119	0.00461853
451	19.567	LS2	43	2	50.306	-145.248	12	2018-08-22 06:32:00	2018-08-22 06:32:00	629.306	34.5268	5.30452	1.89986	3.33817	1.20954	0.798586	0.358632	0.502556	0.227367	0.184484	0.077162	0.116097	0.0489745	0.784293	0.237113	0.493561	0.151654	0.0452341	0.0163078	0.0284661	0.0103808
452	34.956	LS2	43	2	50.306	-145.248	11	2018-08-22 06:32:00	2018-08-22 06:32:00	962.006	46.0153	5.30452	1.89986	5.10298	1.84391	0.798586	0.358632	0.768245	0.346957	0.184484	0.077162	0.177475	0.0747141	0.784293	0.237113	0.754495	0.230941	0.0452341	0.0163078	0.0435154	0.0158257
453	49.464	LS2	43	2	50.306	-145.248	10	2018-08-22 06:32:00	2018-08-22 06:32:00	1133.18	58.1209	5.30452	1.89986	6.01098	2.17485	0.798586	0.358632	0.904943	0.409036	0.184484	0.077162	0.209054	0.0880934	0.784293	0.237113	0.888746	0.272531	0.0452341	0.0163078	0.0512583	0.0186658
454	66.023	LS2	43	2	50.306	-145.248	9	2018-08-22 06:32:00	2018-08-22 06:32:00	1177.01	70.0391	4.123	1.2185	4.85281	1.46296	0.616938	0.219671	0.726141	0.26214	0.134126	0.0459375	0.157868	0.0548789	0.72001	0.207852	0.847459	0.249787	0.0452341	0.0163078	0.0532409	0.0194541
455	79.539	LS2	43	2	50.306	-145.248	8	2018-08-22 06:32:00	2018-08-22 06:32:00	1259.33	77.8398	3.12688	0.758899	3.93777	0.986212	0.462855	0.128523	0.582888	0.165814	0.0908752	0.0254742	0.114442	0.0328511	0.667298	0.184518	0.840349	0.238104	0.0452341	0.0163078	0.0569647	0.0208366
456	95.938	LS2	43	2	50.306	-145.248	7	2018-08-22 06:32:00	2018-08-22 06:32:00	1383.77	86.6779	1.91827	0.3426	2.65445	0.502392	0.275907	0.0503694	0.381792	0.0736885	0.0383984	0.00786726	0.0531346	0.0113839	0.603342	0.157928	0.834887	0.224707	0.0452341	0.0163078	0.0625936	0.0229044
457	110.947	LS2	43	2	50.306	-145.248	6	2018-08-22 06:32:00	2018-08-22 06:32:00	1298.18	94.4161	1.50594	0.276268	1.95498	0.385802	0.200911	0.0331408	0.260819	0.0470191	0.0184159	0.00427276	0.0239072	0.00581295	0.576069	0.164743	0.747842	0.220674	0.0452341	0.0163078	0.058722	0.021597
458	124.53	LS2	43	2	50.306	-145.248	5	2018-08-22 06:32:00	2018-08-22 06:32:00	1355.2	103.845	1.36875	0.286368	1.85492	0.413296	0.172387	0.030543	0.233618	0.0450971	0.014341	0.0040091	0.0194349	0.00563353	0.558411	0.177139	0.756757	0.246962	0.0452341	0.0163078	0.0613011	0.022594
459	146.241	LS2	43	2	50.306	-145.248	4	2018-08-22 06:32:00	2018-08-22 06:32:00	1342.09	137.906	1.14947	0.287832	1.54268	0.417555	0.126794	0.0249425	0.170168	0.0377667	0.00948847	0.00344978	0.0127344	0.00481126	0.530187	0.19466	0.711557	0.27129	0.0452341	0.0163078	0.060708	0.0227581
460	196.394	LS2	43	2	50.306	-145.248	3	2018-08-22 06:32:00	2018-08-22 06:32:00	1551.95	263.585	1.03319	0.075298	1.60346	0.296347	0.125856	0.0162014	0.195321	0.0416258	0.00922524	0.00260051	0.0143171	0.00471179	0.534403	0.203876	0.829365	0.346343	0.0452341	0.0163078	0.0702008	0.0279767
461	330.053	LS2	43	2	50.306	-145.248	2	2018-08-22 06:32:00	2018-08-22 06:32:00	1634.54	482.96	0.939781	0.150368	1.53611	0.516153	0.10761	0.0289389	0.175892	0.0702743	0.00702652	0.000427261	0.0114851	0.00346465	0.521982	0.188324	0.8532	0.39788	0.0452341	0.0163078	0.0739369	0.0344643
462	498.36	LS2	43	2	50.306	-145.248	1	2018-08-22 06:32:00	2018-08-22 06:32:00	1327.98	530.841	0.876803	0.158282	1.16438	0.510705	0.120949	0.0504373	0.160618	0.0927822	0.00803236	0.00133428	0.0106668	0.00461742	0.802252	0.183303	1.06538	0.490529	0.0452341	0.0163078	0.06007	0.0323355
505	5.546	LS3	44	2	50.23	-145.502	23	2018-08-22 15:52:00	2018-08-22 15:52:00	376.479	15.2918	5.30452	1.89986	1.99704	0.719843	0.798586	0.358632	0.300651	0.135568	0.184484	0.077162	0.0694545	0.0291865	0.784293	0.237113	0.29527	0.0900701	0.0452341	0.0163078	0.0170297	0.00617839
504	15.498	LS3	44	2	50.23	-145.502	19	2018-08-22 15:52:00	2018-08-22 15:52:00	637.65	22.8721	5.30452	1.89986	3.38243	1.21751	0.798586	0.358632	0.509219	0.22941	0.184484	0.077162	0.117637	0.0493829	0.784293	0.237113	0.500105	0.152256	0.0452341	0.0163078	0.0288435	0.01045
503	25.797	LS3	44	2	50.23	-145.502	16	2018-08-22 15:52:00	2018-08-22 15:52:00	1133.05	36.533	5.30452	1.89986	6.01031	2.16135	0.798586	0.358632	0.904841	0.407395	0.184484	0.077162	0.209031	0.087688	0.784293	0.237113	0.888646	0.270185	0.0452341	0.0163078	0.0512526	0.0185514
502	50.724	LS3	44	2	50.23	-145.502	13	2018-08-22 15:52:00	2018-08-22 15:52:00	1612.2	61.1411	5.25054	1.86573	8.46495	3.02502	0.791346	0.351992	1.27581	0.569541	0.183083	0.0755895	0.295168	0.122379	0.779676	0.235812	1.257	0.383154	0.0452341	0.0163078	0.0729265	0.0264366
501	75.348	LS3	44	2	50.23	-145.502	11	2018-08-22 15:52:00	2018-08-22 15:52:00	1912.35	77.3211	3.43575	0.890151	6.57037	1.72289	0.510633	0.154202	0.97651	0.29752	0.104286	0.0312441	0.199432	0.0602914	0.683643	0.191616	1.30737	0.37023	0.0452341	0.0163078	0.0865035	0.0313818
500	96.132	LS3	44	2	50.23	-145.502	8	2018-08-22 15:52:00	2018-08-22 15:52:00	1873.3	88.6615	1.90397	0.338602	3.56671	0.656382	0.273695	0.0496577	0.512713	0.0961368	0.0377776	0.00770636	0.0707688	0.0148198	0.602585	0.157625	1.12882	0.300073	0.0452341	0.0163078	0.0847369	0.0308116
499	110.619	LS3	44	2	50.23	-145.502	7	2018-08-22 15:52:00	2018-08-22 15:52:00	2098.51	93.5349	1.50925	0.275936	3.16718	0.596015	0.2016	0.0331949	0.42306	0.072167	0.0185143	0.00427433	0.0388525	0.00913537	0.576495	0.16443	1.20978	0.349246	0.0452341	0.0163078	0.0949242	0.0344827
498	125.752	LS3	44	2	50.23	-145.502	6	2018-08-22 15:52:00	2018-08-22 15:52:00	2040.42	106.207	1.3564	0.286931	2.76763	0.602922	0.169821	0.0302751	0.346506	0.0643531	0.0139744	0.00396638	0.0285136	0.00822805	0.556822	0.1782	1.13615	0.36838	0.0452341	0.0163078	0.0922964	0.0336198
497 avg	150.337	LS3	44	2	50.23	-145.502	5	2018-08-22 15:52:00	2018-08-22 15:52:00	2062.06	106.906	1.11696	0.287669	2.30324	0.605088	0.12436	0.0256419	0.256437	0.0545209	0.00948847	0.00344978	0.0195658	0.00718559	0.526488	0.194504	1.08565	0.405008	0.0452341	0.0163078	0.0932752	0.0339736
496	196.487	LS3	44	2	50.23	-145.502	3	2018-08-22 15:52:00	2018-08-22 15:52:00	2320.33	259.266	1.03302	0.0749033	2.39695	0.319278	0.125859	0.016182	0.292035	0.0497455	0.00922459	0.00259878	0.0214041	0.006487	0.534403	0.203876	1.23999	0.492932	0.0452341	0.0163078	0.104958	0.0396152
495	330.451	LS3	44	2	50.23	-145.502	2	2018-08-22 15:52:00	2018-08-22 15:52:00	2425.75	313.433	0.939781	0.150368	2.27967	0.468841	0.10761	0.0289389	0.261034	0.077881	0.00702652	0.000427261	0.0170446	0.00243403	0.521982	0.188324	1.2662	0.485241	0.0452341	0.0163078	0.109726	0.0420226
519	5.953	LS4	45	2	50.153	-145.756	13	2018-08-22 18:12:00	2018-08-22 18:12:00	448.137	19.8515	5.30452	1.89986	2.37715	0.857886	0.798586	0.358632	0.357876	0.161496	0.184484	0.077162	0.0826744	0.0347725	0.784293	0.237113	0.351471	0.107394	0.0452341	0.0163078	0.0202711	0.0073631
507	20.599	LS4	45	2	50.153	-145.756	12	2018-08-22 18:12:00	2018-08-22 18:12:00	817.023	33.4195	5.30452	1.89986	4.33392	1.56232	0.798586	0.358632	0.652463	0.294223	0.184484	0.077162	0.150728	0.0633438	0.784293	0.237113	0.640785	0.195492	0.0452341	0.0163078	0.0369573	0.0134093
508	35.654	LS4	45	2	50.153	-145.756	11	2018-08-22 18:12:00	2018-08-22 18:12:00	1200.64	44.0418	5.30452	1.89986	6.36882	2.29298	0.798586	0.358632	0.958814	0.432021	0.184484	0.077162	0.221499	0.0929993	0.784293	0.237113	0.941653	0.286775	0.0452341	0.0163078	0.0543098	0.0196809
509	50.609	LS4	45	2	50.153	-145.756	10	2018-08-22 18:12:00	2018-08-22 18:12:00	1444.09	54.6373	5.25902	1.8711	7.59451	2.71728	0.792657	0.353103	1.14467	0.51175	0.183451	0.0758385	0.26492	0.109975	0.780125	0.236028	1.12657	0.343501	0.0452341	0.0163078	0.0653221	0.0236793
510	65.598	LS4	45	2	50.153	-145.756	9	2018-08-22 18:12:00	2018-08-22 18:12:00	1579	65.0527	4.15433	1.23466	6.55968	1.96816	0.621783	0.222929	0.981795	0.354321	0.135486	0.0466682	0.213933	0.0742143	0.721668	0.208607	1.13951	0.332718	0.0452341	0.0163078	0.0714245	0.0259176
511	80.273	LS4	45	2	50.153	-145.756	8	2018-08-22 18:12:00	2018-08-22 18:12:00	1628.29	80.6569	3.07278	0.736954	5.00337	1.2253	0.454488	0.124265	0.740037	0.205632	0.0885264	0.0245169	0.144147	0.0405541	0.664435	0.183287	1.08189	0.303218	0.0452341	0.0163078	0.0736541	0.0268033
512	95.695	LS4	45	2	50.153	-145.756	7	2018-08-22 18:12:00	2018-08-22 18:12:00	1682.02	88.1057	1.93618	0.347637	3.2567	0.60911	0.278677	0.0512679	0.468742	0.0896613	0.039176	0.00807037	0.065895	0.0140065	0.60429	0.158308	1.01643	0.271549	0.0452341	0.0163078	0.0760848	0.0277182
513	110.422	LS4	45	2	50.153	-145.756	6	2018-08-22 18:12:00	2018-08-22 18:12:00	1711.69	95.5855	1.51124	0.275735	2.58677	0.493584	0.202014	0.0332272	0.345785	0.0600632	0.0185734	0.00427517	0.0317919	0.00753005	0.576751	0.164242	0.98722	0.286486	0.0452341	0.0163078	0.0774267	0.0282468
514	125.153	LS4	45	2	50.153	-145.756	5	2018-08-22 18:12:00	2018-08-22 18:12:00	1584.26	107.343	1.36245	0.286662	2.15848	0.477114	0.171079	0.0304071	0.271033	0.0515543	0.0141541	0.00398771	0.0224237	0.00649769	0.557601	0.177681	0.883383	0.287785	0.0452341	0.0163078	0.0716623	0.0262881
515	145.293	LS4	45	2	50.153	-145.756	4	2018-08-22 18:12:00	2018-08-22 18:12:00	1691.89	138.55	1.15904	0.288145	1.96097	0.513277	0.128785	0.0252242	0.217889	0.0462565	0.00948847	0.00344978	0.0160534	0.00598285	0.531419	0.193954	0.899101	0.336307	0.0452341	0.0163078	0.0765309	0.0282938
516	196.01	LS4	45	2	50.153	-145.756	3	2018-08-22 18:12:00	2018-08-22 18:12:00	1881.07	270.374	1.03388	0.0769293	1.94481	0.314771	0.12584	0.0162816	0.236715	0.0457781	0.00922793	0.00260765	0.0173584	0.00550324	0.534403	0.203876	1.00525	0.409821	0.0452341	0.0163078	0.0850885	0.0330243
517	331.261	LS4	45	2	50.153	-145.756	2	2018-08-22 18:12:00	2018-08-22 18:12:00	1051.3	497.073	0.929496	0.148963	0.97718	0.487846	0.108201	0.0302567	0.113752	0.062486	0.00708757	0.000390926	0.00745116	0.00354693	0.521982	0.188324	0.54876	0.326373	0.0452341	0.0163078	0.0475546	0.0282752
518	502.196	LS4	45	2	50.153	-145.756	1	2018-08-22 18:12:00	2018-08-22 18:12:00	1500.24	545.145	0.876803	0.158282	1.31541	0.53372	0.120949	0.0504373	0.181452	0.100364	0.00803236	0.00133428	0.0120505	0.00481465	0.802252	0.183303	1.20357	0.516618	0.0452341	0.0163078	0.0678618	0.0347367
520	7.623	LS5	47	2	50.101	-145.531	13	2018-08-22 23:46:00	2018-08-22 23:46:00	394.204	26.3064	5.30452	1.89986	2.09106	0.761822	0.798586	0.358632	0.314806	0.142926	0.184484	0.077162	0.0727245	0.0308023	0.784293	0.237113	0.309171	0.0957208	0.0452341	0.0163078	0.0178314	0.00653781
521	20.795	LS5	47	2	50.101	-145.531	12	2018-08-22 23:46:00	2018-08-22 23:46:00	763.957	36.1342	5.30452	1.89986	4.05243	1.46401	0.798586	0.358632	0.610085	0.275495	0.184484	0.077162	0.140938	0.0593241	0.784293	0.237113	0.599166	0.183348	0.0452341	0.0163078	0.0345569	0.0125652
522	36.699	LS5	47	2	50.101	-145.531	11	2018-08-22 23:46:00	2018-08-22 23:46:00	1120.76	45.482	5.30452	1.89986	5.94508	2.1429	0.798586	0.358632	0.89502	0.403576	0.184484	0.077162	0.206762	0.0868858	0.784293	0.237113	0.879001	0.268129	0.0452341	0.0163078	0.0506963	0.0183925
523	50.731	LS5	47	2	50.101	-145.531	10	2018-08-22 23:46:00	2018-08-22 23:46:00	1541.55	53.3329	5.25003	1.8654	8.09319	2.88921	0.791267	0.351924	1.21978	0.544148	0.183061	0.0755743	0.282198	0.11691	0.779649	0.235799	1.20187	0.365867	0.0452341	0.0163078	0.0697307	0.0252548
524	66.84	LS5	47	2	50.101	-145.531	9	2018-08-22 23:46:00	2018-08-22 23:46:00	1816.63	60.7867	4.06279	1.18773	7.38057	2.17174	0.607624	0.213475	1.10383	0.38956	0.131512	0.0445478	0.238908	0.0813206	0.716824	0.206405	1.3022	0.377484	0.0452341	0.0163078	0.0821733	0.0297525
525	80.672	LS5	47	2	50.101	-145.531	8	2018-08-22 23:46:00	2018-08-22 23:46:00	1887.64	70.5149	3.04337	0.725154	5.74479	1.38555	0.449939	0.12198	0.849322	0.232429	0.0872496	0.0240031	0.164696	0.045725	0.662879	0.18262	1.25128	0.347875	0.0452341	0.0163078	0.0853855	0.0309481
526	95.652	LS5	47	2	50.101	-145.531	7	2018-08-22 23:46:00	2018-08-22 23:46:00	1929.52	79.6392	1.93935	0.348532	3.742	0.690007	0.279167	0.0514277	0.538658	0.101691	0.0393136	0.0081065	0.0758563	0.0159519	0.604457	0.158376	1.16631	0.309357	0.0452341	0.0163078	0.0872799	0.0316717
527	112.545	LS5	47	2	50.101	-145.531	6	2018-08-22 23:46:00	2018-08-22 23:46:00	1934.51	89.1902	1.4898	0.277823	2.88203	0.553633	0.197556	0.0328714	0.382173	0.065986	0.0179365	0.00426185	0.0346984	0.00839837	0.573991	0.166259	1.11039	0.325678	0.0452341	0.0163078	0.0875058	0.0318046
528	127.489	LS5	47	2	50.101	-145.531	5	2018-08-22 23:46:00	2018-08-22 23:46:00	1884.15	100.002	1.33886	0.287631	2.52261	0.558234	0.166173	0.0298846	0.313095	0.058708	0.0134533	0.00390027	0.025348	0.00747082	0.554564	0.179693	1.04488	0.34308	0.0452341	0.0163078	0.0852277	0.0310576
529	147.482	LS5	47	2	50.101	-145.531	4	2018-08-22 23:46:00	2018-08-22 23:46:00	1889.73	133.594	1.13693	0.28737	2.14849	0.563892	0.124188	0.0245685	0.234681	0.0493031	0.00948847	0.00344978	0.0179306	0.00664123	0.528573	0.195577	0.998859	0.376272	0.0452341	0.0163078	0.08548	0.0314042
530	197.359	LS5	47	2	50.101	-145.531	3	2018-08-22 23:46:00	2018-08-22 23:46:00	1220.12	284.113	1.03145	0.0712079	1.2585	0.305657	0.125894	0.0159999	0.153606	0.0407488	0.00921849	0.00258259	0.0112476	0.00409742	0.534403	0.203876	0.652035	0.291429	0.0452341	0.0163078	0.0551909	0.023687
531	331.668	LS5	47	2	50.101	-145.531	2	2018-08-22 23:46:00	2018-08-22 23:46:00	1631.91	470.469	0.929333	0.148983	1.51659	0.500274	0.108233	0.0303055	0.176627	0.0709843	0.00709001	0.000392792	0.0115702	0.00339666	0.521982	0.188324	0.851827	0.393393	0.0452341	0.0163078	0.0738178	0.0340754
532	501.269	LS5	47	2	50.101	-145.531	1	2018-08-22 23:46:00	2018-08-22 23:46:00	1713.17	519.678	0.876803	0.158282	1.50211	0.530237	0.120949	0.0504373	0.207206	0.10685	0.00803236	0.00133428	0.0137608	0.00475914	0.802252	0.183303	1.3744	0.52195	0.0452341	0.0163078	0.0774938	0.036512
533	7.189	LS6	48	2	50.045	-145.291	13	2018-08-23 02:52:00	2018-08-23 02:52:00	390.899	26.4613	5.30452	1.89986	2.07353	0.755801	0.798586	0.358632	0.312166	0.141772	0.184484	0.077162	0.0721147	0.030555	0.784293	0.237113	0.306579	0.0949821	0.0452341	0.0163078	0.0176819	0.0064861
534	22.153	LS6	48	2	50.045	-145.291	12	2018-08-23 02:52:00	2018-08-23 02:52:00	842.031	37.207	5.30452	1.89986	4.46657	1.61187	0.798586	0.358632	0.672435	0.303437	0.184484	0.077162	0.155342	0.0653343	0.784293	0.237113	0.660399	0.201778	0.0452341	0.0163078	0.0380885	0.0138344
535	37.234	LS6	48	2	50.045	-145.291	11	2018-08-23 02:52:00	2018-08-23 02:52:00	1227.62	46.2368	5.30452	1.89986	6.51194	2.34517	0.798586	0.358632	0.980361	0.441809	0.184484	0.077162	0.226477	0.0951089	0.784293	0.237113	0.962814	0.293335	0.0452341	0.0163078	0.0555302	0.0201288
536	52.036	LS6	48	2	50.045	-145.291	10	2018-08-23 02:52:00	2018-08-23 02:52:00	1449.59	56.9176	5.15385	1.80494	7.47099	2.63282	0.77639	0.339431	1.12545	0.494017	0.178885	0.0727765	0.25931	0.105987	0.77456	0.23335	1.1228	0.341123	0.0452341	0.0163078	0.065571	0.0237795
537	67.135	LS6	48	2	50.045	-145.291	9	2018-08-23 02:52:00	2018-08-23 02:52:00	1626.17	65.6786	4.04105	1.17671	6.57144	1.93185	0.604261	0.21126	0.982632	0.34583	0.130568	0.0440509	0.212326	0.0721458	0.715674	0.205884	1.16381	0.338086	0.0452341	0.0163078	0.0735584	0.0266852
538	82.267	LS6	48	2	50.045	-145.291	8	2018-08-23 02:52:00	2018-08-23 02:52:00	1740.36	74.4792	2.92582	0.678903	5.09198	1.20146	0.431756	0.113056	0.751411	0.199369	0.0821456	0.0219963	0.142963	0.0387673	0.656659	0.179964	1.14282	0.316997	0.0452341	0.0163078	0.0787235	0.0285807
539	97.033	LS6	48	2	50.045	-145.291	7	2018-08-23 02:52:00	2018-08-23 02:52:00	1785.37	82.5886	1.83757	0.320321	3.28074	0.591686	0.263424	0.0464175	0.470309	0.0856806	0.0348944	0.00697358	0.0622994	0.0127796	0.599071	0.15622	1.06956	0.283265	0.0452341	0.0163078	0.0807595	0.0293542
540	112.068	LS6	48	2	50.045	-145.291	6	2018-08-23 02:52:00	2018-08-23 02:52:00	1749.62	91.5067	1.49461	0.277369	2.61501	0.504195	0.198557	0.0329528	0.347401	0.0604502	0.0180796	0.00426566	0.0316325	0.00764448	0.574612	0.165808	1.00535	0.294828	0.0452341	0.0163078	0.0791426	0.0288312
541	127.131	LS6	48	2	50.045	-145.291	5	2018-08-23 02:52:00	2018-08-23 02:52:00	1767.47	102.22	1.34248	0.287496	2.37279	0.526345	0.166925	0.029966	0.295035	0.0556448	0.0135607	0.00391441	0.0239682	0.00705611	0.55503	0.179386	0.981	0.322097	0.0452341	0.0163078	0.07995	0.0291921
542	147.095	LS6	48	2	50.045	-145.291	4	2018-08-23 02:52:00	2018-08-23 02:52:00	1823.52	133.101	1.14084	0.287521	2.08034	0.545844	0.125001	0.0246858	0.22794	0.0479912	0.00948847	0.00344978	0.0173024	0.00641624	0.529077	0.195292	0.964779	0.363014	0.0452341	0.0163078	0.082485	0.0303409
543	196.704	LS6	48	2	50.045	-145.291	3	2018-08-23 02:52:00	2018-08-23 02:52:00	1560.28	281.033	1.03263	0.0739826	1.61119	0.312319	0.125868	0.0161367	0.196389	0.0434186	0.00922307	0.00259475	0.0143905	0.00480718	0.534403	0.203876	0.833817	0.351774	0.0452341	0.0163078	0.0705776	0.0284435
544	331.331	LS6	48	2	50.045	-145.291	2	2018-08-23 02:52:00	2018-08-23 02:52:00	2338.73	476.906	0.929468	0.148967	2.17378	0.563795	0.108206	0.0302651	0.253066	0.0875963	0.00708799	0.000391247	0.0165769	0.00350196	0.521982	0.188324	1.22078	0.505922	0.0452341	0.0163078	0.10579	0.0438178
545	500.961	LS6	48	2	50.045	-145.291	1	2018-08-23 02:52:00	2018-08-23 02:52:00	1635.66	532.031	0.876803	0.158282	1.43415	0.533513	0.120949	0.0504373	0.197831	0.104626	0.00803236	0.00133428	0.0131382	0.00479849	0.802252	0.183303	1.31221	0.521604	0.0452341	0.0163078	0.0739875	0.0359259
588	5.269	LS11	49	2	50.425	-145.18	23	2018-08-23 15:29:00	2018-08-23 15:29:00	312.25	16.7438	5.30452	1.89986	1.65634	0.599844	0.798586	0.358632	0.249359	0.112778	0.184484	0.077162	0.0576054	0.0242911	0.784293	0.237113	0.244896	0.0751942	0.0452341	0.0163078	0.0141244	0.00514814
587	14.926	LS11	49	2	50.425	-145.18	19	2018-08-23 15:29:00	2018-08-23 15:29:00	724.392	27.9813	5.30452	1.89986	3.84255	1.38422	0.798586	0.358632	0.578489	0.260749	0.184484	0.077162	0.133639	0.0561333	0.784293	0.237113	0.568135	0.173159	0.0452341	0.0163078	0.0327672	0.0118809
586	31.121	LS11	49	2	50.425	-145.18	16	2018-08-23 15:29:00	2018-08-23 15:29:00	1401.87	54.087	5.30452	1.89986	7.43623	2.67876	0.798586	0.358632	1.11951	0.504606	0.184484	0.077162	0.258623	0.10863	0.784293	0.237113	1.09947	0.335097	0.0452341	0.0163078	0.0634121	0.0229919
585	65.941	LS11	49	2	50.425	-145.18	13	2018-08-23 15:29:00	2018-08-23 15:29:00	1628.27	75.7235	4.12905	1.22161	6.7232	2.01353	0.617873	0.220298	1.00606	0.361742	0.134389	0.0460781	0.218821	0.0757145	0.72033	0.207998	1.17289	0.34304	0.0452341	0.0163078	0.0736532	0.0267735
584	75.812	LS11	49	2	50.425	-145.18	11	2018-08-23 15:29:00	2018-08-23 15:29:00	1671.9	84.6191	3.40156	0.875121	5.68705	1.49116	0.505343	0.151244	0.844882	0.256455	0.102802	0.0305799	0.171874	0.0518612	0.681833	0.190824	1.13996	0.324213	0.0452341	0.0163078	0.0756267	0.0275324
583	95.798	LS11	49	2	50.425	-145.18	9	2018-08-23 15:29:00	2018-08-23 15:29:00	1800.11	95.2674	1.92859	0.345498	3.47167	0.648506	0.277503	0.0508861	0.499536	0.0953395	0.0388464	0.00798407	0.0699279	0.014841	0.603888	0.158147	1.08707	0.290438	0.0452341	0.0163078	0.0814264	0.0296705
582	110.793	LS11	49	2	50.425	-145.18	7	2018-08-23 15:29:00	2018-08-23 15:29:00	1835.74	101.959	1.50749	0.276112	2.76736	0.529662	0.201235	0.0331662	0.369414	0.0642487	0.0184621	0.00427352	0.0338916	0.00806774	0.576269	0.164596	1.05788	0.307815	0.0452341	0.0163078	0.0830379	0.0302901
581	125.335	LS11	49	2	50.425	-145.18	6	2018-08-23 15:29:00	2018-08-23 15:29:00	1613.36	116.73	1.36062	0.286745	2.19516	0.489126	0.170697	0.0303672	0.275394	0.0528899	0.0140995	0.00398131	0.0227475	0.00663077	0.557365	0.177839	0.899227	0.294201	0.0452341	0.0163078	0.0729786	0.0268349
580	150.831	LS11	49	2	50.425	-145.18	5	2018-08-23 15:29:00	2018-08-23 15:29:00	1496.11	149.264	1.1152	0.283609	1.66847	0.455793	0.124033	0.0255741	0.185567	0.0425054	0.00948847	0.00344978	0.0141958	0.00535204	0.526488	0.194504	0.787684	0.301424	0.0452341	0.0163078	0.0676752	0.0253153
579	195.653	LS11	49	2	50.425	-145.18	3	2018-08-23 15:29:00	2018-08-23 15:29:00	1265.26	280.068	1.03452	0.0784477	1.30894	0.306267	0.125826	0.0163561	0.159203	0.0408671	0.00923043	0.00261428	0.0116789	0.00419812	0.534403	0.203876	0.676158	0.298232	0.0452341	0.0163078	0.0572328	0.0242124
578	331.168	LS11	49	2	50.425	-145.18	2	2018-08-23 15:29:00	2018-08-23 15:29:00	1684.64	326.918	0.929533	0.148959	1.56593	0.394102	0.108193	0.0302456	0.182267	0.0620265	0.00708701	0.0003905	0.0119391	0.00240846	0.521982	0.188324	0.879353	0.360241	0.0452341	0.0163078	0.0762033	0.0312
600	5.501	LS12	50	2	50.588	-145.298	23	2018-08-23 19:38:00	2018-08-23 19:38:00	209.73	20.6301	5.30452	1.89986	1.11252	0.413211	0.798586	0.358632	0.167487	0.0769989	0.184484	0.077162	0.0386919	0.0166247	0.784293	0.237113	0.16449	0.0522956	0.0452341	0.0163078	0.00948692	0.00354525
599	15.159	LS12	50	2	50.588	-145.298	21	2018-08-23 19:38:00	2018-08-23 19:38:00	436.038	27.8694	5.30452	1.89986	2.31297	0.841499	0.798586	0.358632	0.348214	0.157953	0.184484	0.077162	0.0804422	0.0340361	0.784293	0.237113	0.341982	0.105676	0.0452341	0.0163078	0.0197238	0.00722171
598	25.067	LS12	50	2	50.588	-145.298	19	2018-08-23 19:38:00	2018-08-23 19:38:00	883.619	43.051	5.30452	1.89986	4.68718	1.69421	0.798586	0.358632	0.705646	0.318753	0.184484	0.077162	0.163014	0.0686428	0.784293	0.237113	0.693016	0.212221	0.0452341	0.0163078	0.0399697	0.0145409
597	50.646	LS12	50	2	50.588	-145.298	17	2018-08-23 19:38:00	2018-08-23 19:38:00	1318.62	67.4626	5.25629	1.86937	6.93103	2.49036	0.792236	0.352745	1.04466	0.468197	0.183333	0.0757583	0.241746	0.100659	0.779981	0.235959	1.0285	0.315557	0.0452341	0.0163078	0.0596464	0.0217192
596	75.162	LS12	50	2	50.588	-145.298	15	2018-08-23 19:38:00	2018-08-23 19:38:00	1618.23	83.2883	3.44946	0.89621	5.58202	1.47846	0.512753	0.155395	0.829753	0.255066	0.104882	0.0315122	0.169723	0.0517368	0.684368	0.191934	1.10747	0.31578	0.0452341	0.0163078	0.0731991	0.0266574
595	95.09	LS12	50	2	50.588	-145.298	13	2018-08-23 19:38:00	2018-08-23 19:38:00	1726.12	93.5992	1.98077	0.360328	3.41903	0.649011	0.285574	0.0535388	0.492934	0.0962022	0.041112	0.00858361	0.0709641	0.0153078	0.606649	0.159257	1.04715	0.280699	0.0452341	0.0163078	0.0780792	0.0284658
594	110.461	LS12	50	2	50.588	-145.298	11	2018-08-23 19:38:00	2018-08-23 19:38:00	1758.29	100.757	1.51084	0.275775	2.6565	0.508226	0.201932	0.0332208	0.355054	0.0618538	0.0185617	0.00427501	0.0326368	0.00774587	0.576701	0.164279	1.01401	0.294637	0.0452341	0.0163078	0.0795345	0.0290338
593	125.059	LS12	50	2	50.588	-145.298	9	2018-08-23 19:38:00	2018-08-23 19:38:00	1698.05	114.764	1.3634	0.286619	2.31513	0.511228	0.171276	0.0304277	0.290836	0.0552806	0.0141823	0.00399099	0.0240823	0.00696963	0.557723	0.177599	0.947044	0.30829	0.0452341	0.0163078	0.0768099	0.0281739
592	151.02	LS12	50	2	50.588	-145.298	7	2018-08-23 19:38:00	2018-08-23 19:38:00	1646.88	146.878	1.11486	0.282683	1.83605	0.493504	0.124041	0.0255358	0.20428	0.0458312	0.00948847	0.00344978	0.0156264	0.0058498	0.526488	0.194504	0.867062	0.329526	0.0452341	0.0163078	0.074495	0.0276666
591	196.165	LS12	50	2	50.588	-145.298	5	2018-08-23 19:38:00	2018-08-23 19:38:00	1881.22	269.48	1.0336	0.0762706	1.94444	0.31332	0.125847	0.0162493	0.236745	0.0456567	0.00922685	0.00260477	0.0173577	0.00549489	0.534403	0.203876	1.00533	0.409682	0.0452341	0.0163078	0.0850953	0.0330116
590	330.541	LS12	50	2	50.588	-145.298	3	2018-08-23 19:38:00	2018-08-23 19:38:00	3015.91	453.765	0.929784	0.148929	2.80414	0.616233	0.108143	0.0301706	0.32615	0.10338	0.00708325	0.000387628	0.0213624	0.00342013	0.521982	0.188324	1.57425	0.615379	0.0452341	0.0163078	0.136422	0.0532941
589	498.749	LS12	50	2	50.588	-145.298	1	2018-08-23 19:38:00	2018-08-23 19:38:00	3438.13	499.103	0.876803	0.158282	3.01456	0.69832	0.120949	0.0504373	0.415837	0.183616	0.00803236	0.00133428	0.0276163	0.00609231	0.802252	0.183303	2.75824	0.746661	0.0452341	0.0163078	0.15552	0.060443
625	4.661	LS13	53	2	50.751	-145.417	13	2018-08-24 06:19:00	2018-08-24 06:19:00	332.155	24.0336	5.30452	1.89986	1.76193	0.643798	0.798586	0.358632	0.265255	0.120658	0.184484	0.077162	0.0612775	0.0260104	0.784293	0.237113	0.260507	0.0809826	0.0452341	0.0163078	0.0150247	0.00552474
626	20.056	LS13	53	2	50.751	-145.417	12	2018-08-24 06:19:00	2018-08-24 06:19:00	784.22	35.591	5.30452	1.89986	4.15991	1.50182	0.798586	0.358632	0.626267	0.282679	0.184484	0.077162	0.144676	0.0608671	0.784293	0.237113	0.615058	0.188032	0.0452341	0.0163078	0.0354734	0.0128898
627	34.474	LS13	53	2	50.751	-145.417	11	2018-08-24 06:19:00	2018-08-24 06:19:00	1257.1	44.0542	5.30452	1.89986	6.66832	2.39972	0.798586	0.358632	1.0039	0.452207	0.184484	0.077162	0.231915	0.0973402	0.784293	0.237113	0.985935	0.300071	0.0452341	0.0163078	0.0568637	0.0205972
628	50.4	LS13	53	2	50.751	-145.417	10	2018-08-24 06:19:00	2018-08-24 06:19:00	1555.57	54.4952	5.30452	1.89986	8.25155	2.96947	0.798586	0.358632	1.24226	0.559571	0.184484	0.077162	0.286978	0.120451	0.784293	0.237113	1.22002	0.371314	0.0452341	0.0163078	0.0703647	0.0254874
629	65.971	LS13	53	2	50.751	-145.417	9	2018-08-24 06:19:00	2018-08-24 06:19:00	1551.77	66.4968	4.12684	1.22047	6.40391	1.91367	0.617531	0.220068	0.958266	0.343956	0.134293	0.0460266	0.208392	0.0719789	0.720213	0.207944	1.11761	0.326217	0.0452341	0.0163078	0.0701929	0.0254841
630	79.356	LS13	53	2	50.751	-145.417	8	2018-08-24 06:19:00	2018-08-24 06:19:00	1640.08	75.7699	3.14036	0.764419	5.15044	1.27609	0.464942	0.129596	0.762541	0.215447	0.0914608	0.0257153	0.150003	0.0427407	0.668012	0.184825	1.09559	0.307325	0.0452341	0.0163078	0.0741874	0.0269648
631	95.647	LS13	53	2	50.751	-145.417	7	2018-08-24 06:19:00	2018-08-24 06:19:00	1632.73	85.4399	1.93972	0.348637	3.16704	0.592866	0.279224	0.0514463	0.455899	0.0873204	0.0393296	0.0081107	0.0642148	0.0136623	0.604477	0.158384	0.98695	0.263705	0.0452341	0.0163078	0.0738552	0.0269054
632	110.078	LS13	53	2	50.751	-145.417	6	2018-08-24 06:19:00	2018-08-24 06:19:00	1579.66	94.4782	1.51471	0.275381	2.39273	0.457942	0.202736	0.0332832	0.320254	0.0559565	0.0186766	0.00427644	0.0295026	0.00698196	0.577199	0.163913	0.911776	0.264606	0.0452341	0.0163078	0.0714543	0.0261128
633	125.936	LS13	53	2	50.751	-145.417	5	2018-08-24 06:19:00	2018-08-24 06:19:00	1580.59	105.403	1.35455	0.28701	2.14098	0.475581	0.169434	0.0302343	0.267806	0.0510159	0.0139192	0.00395968	0.0220005	0.00642827	0.556583	0.178359	0.879727	0.287951	0.0452341	0.0163078	0.0714963	0.0262131
634	145.788	LS13	53	2	50.751	-145.417	4	2018-08-24 06:19:00	2018-08-24 06:19:00	1474.03	144.296	1.15404	0.287986	1.70109	0.455995	0.127745	0.0250776	0.1883	0.0413062	0.00948847	0.00344978	0.0139863	0.00526618	0.530776	0.194324	0.78238	0.296502	0.0452341	0.0163078	0.0666764	0.0249086
635	195.955	LS13	53	2	50.751	-145.417	3	2018-08-24 06:19:00	2018-08-24 06:19:00	1300.01	286.145	1.03398	0.0771631	1.34418	0.312411	0.125838	0.0162931	0.16359	0.0417758	0.00922832	0.00260867	0.0119969	0.00429811	0.534403	0.203876	0.694727	0.30599	0.0452341	0.0163078	0.0588045	0.0248392
636	330.057	LS13	53	2	50.751	-145.417	2	2018-08-24 06:19:00	2018-08-24 06:19:00	1252.68	493.714	0.939781	0.150368	1.17724	0.500761	0.10761	0.0289389	0.1348	0.0643178	0.00702652	0.000427261	0.00880197	0.00351014	0.521982	0.188324	0.653875	0.349382	0.0452341	0.0163078	0.0566637	0.0302667
637	501.681	LS13	53	2	50.751	-145.417	1	2018-08-24 06:19:00	2018-08-24 06:19:00	1564.74	541.059	0.876803	0.158282	1.37197	0.535161	0.120949	0.0504373	0.189254	0.102523	0.00803236	0.00133428	0.0125686	0.00482146	0.802252	0.183303	1.25532	0.520269	0.0452341	0.0163078	0.0707797	0.0353573
638	8.417	LS14	54	2	50.695	-145.184	17	2018-08-24 09:51:00	2018-08-24 09:51:00	397.178	26.5496	5.30452	1.89986	2.10684	0.767612	0.798586	0.358632	0.317181	0.14401	0.184484	0.077162	0.0732731	0.0310359	0.784293	0.237113	0.311504	0.0964505	0.0452341	0.0163078	0.0179659	0.00658749
639	21.765	LS14	54	2	50.695	-145.184	16	2018-08-24 09:51:00	2018-08-24 09:51:00	834.086	37.7408	5.30452	1.89986	4.42443	1.59724	0.798586	0.358632	0.66609	0.300644	0.184484	0.077162	0.153876	0.0647352	0.784293	0.237113	0.654168	0.199975	0.0452341	0.0163078	0.0377291	0.0137088
640	36.196	LS14	54	2	50.695	-145.184	15	2018-08-24 09:51:00	2018-08-24 09:51:00	1115.61	48.2217	5.30452	1.89986	5.9178	2.13489	0.798586	0.358632	0.890914	0.401944	0.184484	0.077162	0.205813	0.0865414	0.784293	0.237113	0.874968	0.267217	0.0452341	0.0163078	0.0504637	0.0183235
641	51.392	LS14	54	2	50.695	-145.184	14	2018-08-24 09:51:00	2018-08-24 09:51:00	1429.58	56.4897	5.20131	1.83465	7.43568	2.63919	0.783731	0.345568	1.12041	0.495996	0.180946	0.0741509	0.258676	0.106496	0.777071	0.234557	1.11088	0.338179	0.0452341	0.0163078	0.0646657	0.0234529
642	66.495	LS14	54	2	50.695	-145.184	13	2018-08-24 09:51:00	2018-08-24 09:51:00	1777.17	64.8496	4.08822	1.20067	7.26545	2.1502	0.611557	0.216081	1.08684	0.386054	0.132616	0.0451323	0.235681	0.0806673	0.71817	0.207016	1.27631	0.370837	0.0452341	0.0163078	0.0803885	0.0291298
643	82.227	LS14	54	2	50.695	-145.184	12	2018-08-24 09:51:00	2018-08-24 09:51:00	1770.87	76.9831	2.92877	0.680045	5.18648	1.2252	0.432212	0.113276	0.765394	0.203338	0.0822736	0.0220457	0.145696	0.0395506	0.656815	0.18003	1.16314	0.322796	0.0452341	0.0163078	0.0801038	0.0290883
645	97.072	LS14	54	2	50.695	-145.184	11	2018-08-24 09:51:00	2018-08-24 09:51:00	1735.76	85.6333	1.83469	0.31954	3.18459	0.576468	0.262979	0.0462797	0.456468	0.0834273	0.0347696	0.0069424	0.0603516	0.0124127	0.598919	0.156159	1.03958	0.275864	0.0452341	0.0163078	0.0785154	0.0285702
644	111.783	LS14	54	2	50.695	-145.184	10	2018-08-24 09:51:00	2018-08-24 09:51:00	1708.01	94.7856	1.49749	0.277093	2.55773	0.494105	0.199156	0.033001	0.34016	0.0594431	0.0181651	0.00426772	0.0310262	0.00748989	0.574982	0.165538	0.982075	0.287945	0.0452341	0.0163078	0.0772602	0.028182
646	127.516	LS14	54	2	50.695	-145.184	9	2018-08-24 09:51:00	2018-08-24 09:51:00	1746.61	107.724	1.33859	0.287641	2.33799	0.522681	0.166116	0.0298784	0.290141	0.0551688	0.0134452	0.00389919	0.0234835	0.00696268	0.554529	0.179716	0.968547	0.319527	0.0452341	0.0163078	0.0790063	0.0288972
647	147.637	LS14	54	2	50.695	-145.184	8	2018-08-24 09:51:00	2018-08-24 09:51:00	1670.51	140.381	1.13537	0.287308	1.89665	0.505725	0.123862	0.0245214	0.206914	0.044501	0.00948847	0.00344978	0.0158506	0.00591483	0.528372	0.195691	0.882653	0.335213	0.0452341	0.0163078	0.0755641	0.0279727
648	196.514	LS14	54	2	50.695	-145.184	7	2018-08-24 09:51:00	2018-08-24 09:51:00	1263.33	180.015	1.03297	0.0747887	1.30499	0.208578	0.125861	0.0161764	0.159003	0.0305117	0.0092244	0.00259828	0.0116535	0.0036786	0.534403	0.203876	0.675127	0.274942	0.0452341	0.0163078	0.0571455	0.022153
649	222.094	LS14	54	2	50.695	-145.184	6	2018-08-24 09:51:00	2018-08-24 09:51:00	1278.15	199.697	1.00583	0.0760405	1.28561	0.223141	0.133291	0.0182613	0.170365	0.0354018	0.00785812	0.00191777	0.0100438	0.00291048	0.531291	0.196036	0.679069	0.272101	0.0452341	0.0163078	0.0578159	0.022717
650	251.443	LS14	54	2	50.695	-145.184	5	2018-08-24 09:51:00	2018-08-24 09:51:00	1475.91	211.255	0.98529	0.0970717	1.4542	0.252688	0.130356	0.0220676	0.192393	0.0426513	0.00727114	0.00143308	0.0107315	0.00261402	0.528356	0.191852	0.779803	0.304361	0.0452341	0.0163078	0.0667612	0.0258964
651	276.857	LS14	54	2	50.695	-145.184	4	2018-08-24 09:51:00	2018-08-24 09:51:00	1605.93	220.621	0.9675	0.114522	1.55374	0.281755	0.127814	0.0252104	0.205261	0.0493385	0.00676286	0.00105791	0.0108607	0.00226108	0.525814	0.188257	0.844422	0.323819	0.0452341	0.0163078	0.0726428	0.0280262
652	302.006	LS14	54	2	50.695	-145.184	3	2018-08-24 09:51:00	2018-08-24 09:51:00	1325.29	236.588	0.949896	0.131096	1.25889	0.284062	0.125299	0.0281807	0.166058	0.0476826	0.00702652	0.000427261	0.00931219	0.00175618	0.523299	0.184724	0.693524	0.274338	0.0452341	0.0163078	0.0599483	0.0241171
653	333.603	LS14	54	2	50.695	-145.184	2	2018-08-24 09:51:00	2018-08-24 09:51:00	1550.53	348.457	0.928559	0.149076	1.43976	0.397646	0.108388	0.0305376	0.168059	0.0605677	0.00710162	0.00040168	0.0110113	0.00255178	0.521982	0.188324	0.80935	0.344019	0.0452341	0.0163078	0.0701369	0.0297962
654	502.7	LS14	54	2	50.695	-145.184	1	2018-08-24 09:51:00	2018-08-24 09:51:00	1927.57	409.334	0.876803	0.158282	1.6901	0.471061	0.120949	0.0504373	0.233138	0.109101	0.00803236	0.00133428	0.015483	0.00417435	0.802252	0.183303	1.5464	0.482371	0.0452341	0.0163078	0.0871919	0.0364824
655	4.489	LS15	55	2	50.641	-144.951	24	2018-08-24 15:14:00	2018-08-24 15:14:00	266.243	19.0913	5.30452	1.89986	1.41229	0.515862	0.798586	0.358632	0.212618	0.0966926	0.184484	0.077162	0.0491176	0.0208435	0.784293	0.237113	0.208812	0.064881	0.0452341	0.0163078	0.0120432	0.00442688
656	15.972	LS15	55	2	50.641	-144.951	20	2018-08-24 15:14:00	2018-08-24 15:14:00	477.157	28.5922	5.30452	1.89986	2.53109	0.919132	0.798586	0.358632	0.381051	0.17264	0.184484	0.077162	0.088028	0.0371943	0.784293	0.237113	0.374231	0.115341	0.0452341	0.0163078	0.0215837	0.00788814
657	25.733	LS15	55	2	50.641	-144.951	17	2018-08-24 15:14:00	2018-08-24 15:14:00	919.42	43.109	5.30452	1.89986	4.87709	1.76168	0.798586	0.358632	0.734237	0.331526	0.184484	0.077162	0.169619	0.0713886	0.784293	0.237113	0.721095	0.220613	0.0452341	0.0163078	0.0415891	0.01512
658	49.817	LS15	55	2	50.641	-144.951	14	2018-08-24 15:14:00	2018-08-24 15:14:00	1625.01	62.8125	5.30452	1.89986	8.61989	3.10522	0.798586	0.358632	1.29771	0.584934	0.184484	0.077162	0.299789	0.125923	0.784293	0.237113	1.27448	0.388447	0.0452341	0.0163078	0.0735057	0.0266522
659	75.519	LS15	55	2	50.641	-144.951	11	2018-08-24 15:14:00	2018-08-24 15:14:00	1844.33	81.855	3.42315	0.884597	6.31343	1.65538	0.508683	0.153109	0.938182	0.285437	0.103739	0.0309986	0.19133	0.0577989	0.682976	0.191324	1.25964	0.357266	0.0452341	0.0163078	0.0834267	0.0303041
660	95.725	LS15	55	2	50.641	-144.951	10	2018-08-24 15:14:00	2018-08-24 15:14:00	1948.84	92.4411	1.93397	0.347014	3.769	0.699507	0.278335	0.0511566	0.542431	0.102963	0.03908	0.0080452	0.0761608	0.0160897	0.604173	0.158261	1.17744	0.313443	0.0452341	0.0163078	0.0881541	0.0320553
661	110.731	LS15	55	2	50.641	-144.951	7	2018-08-24 15:14:00	2018-08-24 15:14:00	1862.65	101.155	1.50812	0.27605	2.8091	0.536338	0.201365	0.0331765	0.375073	0.0650666	0.0184807	0.00427382	0.0344231	0.00817719	0.57635	0.164537	1.07354	0.311971	0.0452341	0.0163078	0.0842552	0.0307185
663	125.552	LS15	55	2	50.641	-144.951	6	2018-08-24 15:14:00	2018-08-24 15:14:00	1798.96	115.072	1.35842	0.286842	2.44375	0.539175	0.170241	0.0303193	0.306257	0.0579546	0.0140344	0.00397359	0.0252473	0.00732849	0.557082	0.178027	1.00217	0.326616	0.0452341	0.0163078	0.0813743	0.0297953
662	150.909	LS15	55	2	50.641	-144.951	5	2018-08-24 15:14:00	2018-08-24 15:14:00	1993.06	144.329	1.11506	0.283227	2.22239	0.586982	0.124036	0.0255583	0.247212	0.0539935	0.00948847	0.00344978	0.0189111	0.00701068	0.526488	0.194504	1.04932	0.395036	0.0452341	0.0163078	0.0901544	0.0331517
664	195.309	LS15	55	2	50.641	-144.951	3	2018-08-24 15:14:00	2018-08-24 15:14:00	1736.55	286.757	1.03514	0.0799126	1.79758	0.327671	0.125812	0.0164279	0.218479	0.0459938	0.00923284	0.00262068	0.0160333	0.00526505	0.534403	0.203876	0.928017	0.385783	0.0452341	0.0163078	0.0785511	0.0311486
665	331.769	LS15	55	2	50.641	-144.951	2	2018-08-24 15:14:00	2018-08-24 15:14:00	1795.65	338.049	0.929292	0.148988	1.66868	0.412626	0.108242	0.0303176	0.194363	0.065594	0.00709061	0.000393255	0.0127322	0.00249883	0.521982	0.188324	0.937294	0.381433	0.0452341	0.0163078	0.0812243	0.0330352
666	4.809	LS16	56	2	50.587	-144.72	13	2018-08-24 18:14:00	2018-08-24 18:14:00	282.638	23.4197	5.30452	1.89986	1.49926	0.551157	0.798586	0.358632	0.225711	0.103074	0.184484	0.077162	0.0521424	0.0222328	0.784293	0.237113	0.221671	0.0694888	0.0452341	0.0163078	0.0127849	0.00472939
667	20.135	LS16	56	2	50.587	-144.72	12	2018-08-24 18:14:00	2018-08-24 18:14:00	656.736	37.2099	5.30452	1.89986	3.48367	1.26322	0.798586	0.358632	0.524461	0.237394	0.184484	0.077162	0.121158	0.0511379	0.784293	0.237113	0.515074	0.158432	0.0452341	0.0163078	0.0297068	0.0108414
668	35.118	LS16	56	2	50.587	-144.72	11	2018-08-24 18:14:00	2018-08-24 18:14:00	1000.04	47.8804	5.30452	1.89986	5.30475	1.91684	0.798586	0.358632	0.79862	0.360679	0.184484	0.077162	0.184492	0.0776691	0.784293	0.237113	0.784326	0.240078	0.0452341	0.0163078	0.045236	0.0164517
669	50.084	LS16	56	2	50.587	-144.72	10	2018-08-24 18:14:00	2018-08-24 18:14:00	1349.1	54.8804	5.30452	1.89986	7.15635	2.57959	0.798586	0.358632	1.07738	0.485812	0.184484	0.077162	0.248889	0.104591	0.784293	0.237113	1.05809	0.322773	0.0452341	0.0163078	0.0610254	0.0221405
670	64.923	LS16	56	2	50.587	-144.72	9	2018-08-24 18:14:00	2018-08-24 18:14:00	1446.79	65.1655	4.20407	1.26053	6.08242	1.84419	0.629478	0.228152	0.910723	0.332627	0.137646	0.0478396	0.199146	0.0697927	0.7243	0.209808	1.04791	0.307195	0.0452341	0.0163078	0.0654442	0.0237774
671	80.166	LS16	56	2	50.587	-144.72	8	2018-08-24 18:14:00	2018-08-24 18:14:00	1439.7	75.8975	3.08067	0.740133	4.43523	1.09092	0.455708	0.124881	0.656081	0.183087	0.0888688	0.0246554	0.127944	0.0361315	0.664853	0.183466	0.957187	0.268913	0.0452341	0.0163078	0.0651234	0.023728
672	95.533	LS16	56	2	50.587	-144.72	7	2018-08-24 18:14:00	2018-08-24 18:14:00	1456.36	84.6476	1.94812	0.351015	2.83717	0.537145	0.280524	0.0518713	0.408545	0.0791876	0.0396944	0.00820675	0.0578095	0.0124153	0.604921	0.158562	0.880986	0.236533	0.0452341	0.0163078	0.0658773	0.0240568
673	110.058	LS16	56	2	50.587	-144.72	6	2018-08-24 18:14:00	2018-08-24 18:14:00	1459.98	93.1204	1.51491	0.27536	2.21174	0.426051	0.202778	0.0332865	0.296051	0.0521371	0.0186826	0.0042765	0.0272761	0.00648144	0.577225	0.163893	0.842734	0.245243	0.0452341	0.0163078	0.0660406	0.0241788
674	125.043	LS16	56	2	50.587	-144.72	5	2018-08-24 18:14:00	2018-08-24 18:14:00	1481.36	102.758	1.36357	0.286611	2.01993	0.447098	0.17131	0.0304312	0.253771	0.0483947	0.0141871	0.00399155	0.0210162	0.00608998	0.557744	0.177585	0.826219	0.269238	0.0452341	0.0163078	0.0670079	0.0246008
675	144.569	LS16	56	2	50.587	-144.72	4	2018-08-24 18:14:00	2018-08-24 18:14:00	1448.61	137.369	1.16635	0.288361	1.68959	0.447397	0.130305	0.0254371	0.188762	0.0409661	0.00948847	0.00344978	0.0137451	0.00516457	0.53236	0.193411	0.771184	0.289564	0.0452341	0.0163078	0.0655266	0.0244272
676	194.775	LS16	56	2	50.587	-144.72	3	2018-08-24 18:14:00	2018-08-24 18:14:00	1650.01	273.182	1.03611	0.08219	1.70958	0.313856	0.125791	0.0165393	0.207556	0.0438819	0.00923658	0.00263062	0.0152404	0.00502068	0.534403	0.203876	0.88177	0.36671	0.0452341	0.0163078	0.0746366	0.0296098
677	329.171	LS16	56	2	50.587	-144.72	2	2018-08-24 18:14:00	2018-08-24 18:14:00	1759.39	492.064	0.939781	0.150368	1.65345	0.532761	0.10761	0.0289389	0.189328	0.0734584	0.00702652	0.000427261	0.0123624	0.00353827	0.521982	0.188324	0.918372	0.419232	0.0452341	0.0163078	0.0795846	0.0363132
678	498.523	LS16	56	2	50.587	-144.72	1	2018-08-24 18:14:00	2018-08-24 18:14:00	1836.28	539.698	0.876803	0.158282	1.61006	0.555341	0.120949	0.0504373	0.222096	0.113309	0.00803236	0.00133428	0.0147497	0.00497953	0.802252	0.183303	1.47316	0.548419	0.0452341	0.0163078	0.0830625	0.0386358
691	7.961	LS17	58	2	50.535	-144.487	13	2018-08-24 23:47:00	2018-08-24 23:47:00	327.153	30.2199	5.30452	1.89986	1.73539	0.641884	0.798586	0.358632	0.26126	0.119784	0.184484	0.077162	0.0603547	0.0258521	0.784293	0.237113	0.256584	0.0811123	0.0452341	0.0163078	0.0147985	0.00550749
690	22.331	LS17	58	2	50.535	-144.487	12	2018-08-24 23:47:00	2018-08-24 23:47:00	654.462	41.6161	5.30452	1.89986	3.47161	1.26283	0.798586	0.358632	0.522645	0.237052	0.184484	0.077162	0.120738	0.0510799	0.784293	0.237113	0.51329	0.158577	0.0452341	0.0163078	0.029604	0.0108376
689	37.022	LS17	58	2	50.535	-144.487	11	2018-08-24 23:47:00	2018-08-24 23:47:00	980.39	50.4604	5.30452	1.89986	5.2005	1.88174	0.798586	0.358632	0.782926	0.353901	0.184484	0.077162	0.180867	0.0762195	0.784293	0.237113	0.768913	0.235808	0.0452341	0.0163078	0.044347	0.0161501
688	51.73	LS17	58	2	50.535	-144.487	10	2018-08-24 23:47:00	2018-08-24 23:47:00	1215.25	60.3079	5.1764	1.81903	6.29061	2.2325	0.779878	0.34234	0.947745	0.418678	0.179864	0.073428	0.218579	0.0898902	0.775753	0.233923	0.942732	0.288098	0.0452341	0.0163078	0.0549706	0.0200049
687	67.097	LS17	58	2	50.535	-144.487	9	2018-08-24 23:47:00	2018-08-24 23:47:00	1296.12	70.6983	4.04385	1.17813	5.2413	1.55352	0.604694	0.211545	0.783753	0.277499	0.13069	0.0441148	0.169389	0.0579195	0.715822	0.205951	0.927787	0.271691	0.0452341	0.0163078	0.0586285	0.0213774
686	81.88	LS17	58	2	50.535	-144.487	8	2018-08-24 23:47:00	2018-08-24 23:47:00	1254.19	81.0651	2.95434	0.68999	3.7053	0.897905	0.436168	0.11519	0.547036	0.148734	0.083384	0.0224763	0.104579	0.0289886	0.658168	0.180607	0.825465	0.232713	0.0452341	0.0163078	0.0567319	0.0207791
685	97.602	LS17	58	2	50.535	-144.487	7	2018-08-24 23:47:00	2018-08-24 23:47:00	1326.65	99.2894	1.79563	0.309017	2.38218	0.447048	0.256937	0.0444266	0.340866	0.0642228	0.0330736	0.00652313	0.0438771	0.00925602	0.596852	0.155336	0.791814	0.214428	0.0452341	0.0163078	0.0600098	0.022096
683	126.885	LS17	58	2	50.535	-144.487	5	2018-08-24 23:47:00	2018-08-24 23:47:00	1345.94	119.672	1.34496	0.287401	1.81024	0.418973	0.167442	0.0300217	0.225366	0.045103	0.0136345	0.00392398	0.0183512	0.00552773	0.55535	0.179175	0.747466	0.250149	0.0452341	0.0163078	0.0608823	0.022607
682	148.799	LS17	58	2	50.535	-144.487	4	2018-08-24 23:47:00	2018-08-24 23:47:00	1226.25	154.018	1.12363	0.286815	1.37785	0.391978	0.121422	0.0241653	0.148893	0.0350404	0.00948847	0.00344978	0.0116352	0.00447559	0.526861	0.196539	0.646062	0.2543	0.0452341	0.0163078	0.0554681	0.0211762
681	198.657	LS17	58	2	50.535	-144.487	3	2018-08-24 23:47:00	2018-08-24 23:47:00	1996.23	264.189	1.02912	0.0657275	2.05436	0.301885	0.125946	0.0157286	0.251418	0.0457488	0.0092094	0.00255853	0.0183841	0.00565732	0.534403	0.203876	1.06679	0.430777	0.0452341	0.0163078	0.0902976	0.0346783
680	333.303	LS17	58	2	50.535	-144.487	2	2018-08-24 23:47:00	2018-08-24 23:47:00	1581.7	487.772	0.928679	0.149062	1.46889	0.510669	0.108364	0.0305016	0.1714	0.0715639	0.00709982	0.000400301	0.0112298	0.0035205	0.521982	0.188324	0.82562	0.39186	0.0452341	0.0163078	0.0715468	0.0339434
679	502.482	LS17	58	2	50.535	-144.487	1	2018-08-24 23:47:00	2018-08-24 23:47:00	830.04	545.788	0.876803	0.158282	0.727781	0.496256	0.120949	0.0504373	0.100392	0.0781685	0.00803236	0.00133428	0.00666718	0.0045217	0.802252	0.183303	0.665901	0.463541	0.0452341	0.0163078	0.0375461	0.0281556
692	5.65	LS18	59	2	50.457	-144.741	13	2018-08-25 02:46:00	2018-08-25 02:46:00	300.995	24.7389	5.30452	1.89986	1.59663	0.586712	0.798586	0.358632	0.24037	0.109739	0.184484	0.077162	0.0555288	0.0236695	0.784293	0.237113	0.236068	0.0739601	0.0452341	0.0163078	0.0136152	0.00503451
693	20.716	LS18	59	2	50.457	-144.741	12	2018-08-25 02:46:00	2018-08-25 02:46:00	688.366	36.3736	5.30452	1.89986	3.65146	1.32196	0.798586	0.358632	0.54972	0.248573	0.184484	0.077162	0.126993	0.0535379	0.784293	0.237113	0.539881	0.165695	0.0452341	0.0163078	0.0311376	0.0113457
694	35.388	LS18	59	2	50.457	-144.741	11	2018-08-25 02:46:00	2018-08-25 02:46:00	1043.12	45.6763	5.30452	1.89986	5.53324	1.99654	0.798586	0.358632	0.83302	0.375869	0.184484	0.077162	0.192439	0.0809289	0.784293	0.237113	0.81811	0.249918	0.0452341	0.0163078	0.0471844	0.017136
695	50.329	LS18	59	2	50.457	-144.741	10	2018-08-25 02:46:00	2018-08-25 02:46:00	1312.3	55.0109	5.30452	1.89986	6.96113	2.51021	0.798586	0.358632	1.04799	0.472679	0.184484	0.077162	0.242099	0.101767	0.784293	0.237113	1.02923	0.31414	0.0452341	0.0163078	0.0593607	0.0215449
696	64.958	LS18	59	2	50.457	-144.741	9	2018-08-25 02:46:00	2018-08-25 02:46:00	1402.48	67.2587	4.2015	1.25918	5.89251	1.78845	0.629079	0.22788	0.882271	0.322385	0.137534	0.0477785	0.192889	0.0676439	0.724164	0.209745	1.01563	0.298169	0.0452341	0.0163078	0.0634399	0.0230729
697	80.087	LS18	59	2	50.457	-144.741	8	2018-08-25 02:46:00	2018-08-25 02:46:00	1325.53	78.033	3.08649	0.742485	4.09122	1.01322	0.456608	0.125337	0.605246	0.169915	0.0891216	0.024758	0.118133	0.0335461	0.665161	0.183599	0.881687	0.248838	0.0452341	0.0163078	0.0599589	0.0219027
698	94.369	LS18	59	2	50.457	-144.741	7	2018-08-25 02:46:00	2018-08-25 02:46:00	1301.97	86.8808	2.0339	0.375726	2.64808	0.520121	0.293793	0.0563084	0.382509	0.0776282	0.0434192	0.00920933	0.0565304	0.0125697	0.609461	0.160391	0.793498	0.215432	0.0452341	0.0163078	0.0588933	0.0215929
699	109.444	LS18	59	2	50.457	-144.741	6	2018-08-25 02:46:00	2018-08-25 02:46:00	1148.08	97.2085	1.52112	0.274715	1.74636	0.348336	0.204068	0.0333854	0.234286	0.0431582	0.0188668	0.00427812	0.0216606	0.00524287	0.578023	0.163304	0.663616	0.195724	0.0452341	0.0163078	0.0519323	0.0192321
700	125.152	LS18	59	2	50.457	-144.741	5	2018-08-25 02:46:00	2018-08-25 02:46:00	991.689	110.307	1.36246	0.286662	1.35114	0.321561	0.171081	0.0304074	0.169659	0.0355729	0.0141544	0.00398775	0.0140368	0.00425166	0.557602	0.17768	0.552968	0.18663	0.0452341	0.0163078	0.0448581	0.0169245
701	145.933	LS18	59	2	50.457	-144.741	4	2018-08-25 02:46:00	2018-08-25 02:46:00	1040.62	126.274	1.15258	0.287938	1.1994	0.333111	0.127441	0.0250344	0.132618	0.0306209	0.00948847	0.00344978	0.00987391	0.00378458	0.530587	0.194431	0.552141	0.213134	0.0452341	0.0163078	0.0470716	0.0179057
702	196.647	LS18	59	2	50.457	-144.741	3	2018-08-25 02:46:00	2018-08-25 02:46:00	545.05	286.192	1.03274	0.0742244	0.562892	0.298316	0.125866	0.0161486	0.0686031	0.0370815	0.00922347	0.00259581	0.00502725	0.00299495	0.534403	0.203876	0.291276	0.189049	0.0452341	0.0163078	0.0246548	0.0157034
703	331.855	LS18	59	2	50.457	-144.741	2	2018-08-25 02:46:00	2018-08-25 02:46:00	506.147	490.145	0.929258	0.148992	0.470341	0.461672	0.108248	0.0303279	0.0547896	0.0552333	0.00709113	0.00039365	0.00358915	0.00348139	0.521982	0.188324	0.2642	0.273026	0.0452341	0.0163078	0.0228951	0.0236579
704	501.277	LS18	59	2	50.457	-144.741	1	2018-08-25 02:46:00	2018-08-25 02:46:00	-107.013	546.24	0.876803	0.158282	-0.0938295	-0.479244	0.120949	0.0504373	-0.0129431	-0.0662872	0.00803236	0.00133428	-0.00085957	-0.00438992	0.802252	0.183303	-0.0858516	-0.438661	0.0452341	0.0163078	-0.00484064	-0.0247702
747	5.873	LS19	60	2	50.381	-144.995	24	2018-08-25 15:19:00	2018-08-25 15:19:00	233.545	21.6115	5.30452	1.89986	1.23884	0.458273	0.798586	0.358632	0.186506	0.0855162	0.184484	0.077162	0.0430854	0.0184566	0.784293	0.237113	0.183168	0.0579125	0.0452341	0.0163078	0.0105642	0.00393206
746	15.786	LS19	60	2	50.381	-144.995	20	2018-08-25 15:19:00	2018-08-25 15:19:00	568.809	28.4917	5.30452	1.89986	3.01726	1.09118	0.798586	0.358632	0.454243	0.205258	0.184484	0.077162	0.104936	0.0442041	0.784293	0.237113	0.446113	0.136711	0.0452341	0.0163078	0.0257296	0.00936514
745	35.548	LS19	60	2	50.381	-144.995	17	2018-08-25 15:19:00	2018-08-25 15:19:00	811.352	48.7732	5.30452	1.89986	4.30383	1.56302	0.798586	0.358632	0.647934	0.293572	0.184484	0.077162	0.149682	0.0632488	0.784293	0.237113	0.636337	0.196148	0.0452341	0.0163078	0.0367007	0.013414
744	51.661	LS19	60	2	50.381	-144.995	14	2018-08-25 15:19:00	2018-08-25 15:19:00	1112.93	56.4097	5.18148	1.82221	5.76662	2.04894	0.780665	0.342998	0.868824	0.384264	0.180085	0.0735753	0.200421	0.0825118	0.776022	0.234052	0.863657	0.264136	0.0452341	0.0163078	0.0503423	0.0183279
743	75.565	LS19	60	2	50.381	-144.995	11	2018-08-25 15:19:00	2018-08-25 15:19:00	1220.03	66.3919	3.41976	0.883106	4.17219	1.10107	0.508159	0.152815	0.619967	0.189466	0.103592	0.0309327	0.126385	0.0383602	0.682797	0.191245	0.833029	0.237687	0.0452341	0.0163078	0.0551867	0.0201213
742	95.684	LS19	60	2	50.381	-144.995	10	2018-08-25 15:19:00	2018-08-25 15:19:00	1264.14	79.6138	1.93699	0.347866	2.44862	0.466006	0.278802	0.0513088	0.352444	0.0685542	0.0392112	0.00807961	0.0495683	0.0106801	0.604332	0.158326	0.763959	0.205847	0.0452341	0.0163078	0.057182	0.0209275
741	110.506	LS19	60	2	50.381	-144.995	7	2018-08-25 15:19:00	2018-08-25 15:19:00	1145.71	90.8133	1.51039	0.275821	1.73047	0.344495	0.201837	0.0332134	0.231247	0.0422374	0.0185482	0.00427482	0.0212509	0.00517927	0.576642	0.164322	0.660665	0.195413	0.0452341	0.0163078	0.0518251	0.0191303
740	126.563	LS19	60	2	50.381	-144.995	6	2018-08-25 15:19:00	2018-08-25 15:19:00	1090.76	97.6495	1.34821	0.287272	1.47058	0.339878	0.168118	0.0300942	0.183376	0.0367018	0.0137311	0.0039363	0.0149773	0.00449806	0.555768	0.178899	0.60621	0.202542	0.0452341	0.0163078	0.0493395	0.0183281
739	151.368	LS19	60	2	50.381	-144.995	5	2018-08-25 15:19:00	2018-08-25 15:19:00	1057.42	134.126	1.11424	0.28098	1.17822	0.332583	0.124055	0.0254653	0.131178	0.0316535	0.00948847	0.00344978	0.0100333	0.00386349	0.526488	0.194504	0.556719	0.217457	0.0452341	0.0163078	0.0478314	0.0182804
738	195.688	LS19	60	2	50.381	-144.995	3	2018-08-25 15:19:00	2018-08-25 15:19:00	1240.83	201.744	1.03446	0.0782988	1.2836	0.230203	0.125828	0.0163488	0.156131	0.032495	0.00923018	0.00261363	0.0114531	0.00373967	0.534403	0.203876	0.663106	0.274992	0.0452341	0.0163078	0.056128	0.0221979
737	330.714	LS19	60	2	50.381	-144.995	2	2018-08-25 15:19:00	2018-08-25 15:19:00	1030.57	276.463	0.929714	0.148937	0.958134	0.299373	0.108157	0.0301913	0.111463	0.043153	0.00708428	0.00038842	0.00730084	0.00199903	0.521982	0.188324	0.537938	0.241852	0.0452341	0.0163078	0.0466168	0.0209485
810	5.56	SS11	66	2	50.526	-145.007	24	2018-08-27 15:20:00	2018-08-27 15:20:00	315.126	24.2807	5.30452	1.89986	1.6716	0.612394	0.798586	0.358632	0.251656	0.114666	0.184484	0.077162	0.0581359	0.0247249	0.784293	0.237113	0.247151	0.0771091	0.0452341	0.0163078	0.0142544	0.00525508
809	15.802	SS11	66	2	50.526	-145.007	20	2018-08-27 15:20:00	2018-08-27 15:20:00	876.094	47.872	5.30452	1.89986	4.64726	1.68372	0.798586	0.358632	0.699637	0.316512	0.184484	0.077162	0.161626	0.0681756	0.784293	0.237113	0.687114	0.211099	0.0452341	0.0163078	0.0396293	0.0144503
807	50.435	SS11	66	2	50.526	-145.007	14	2018-08-27 15:20:00	2018-08-27 15:20:00	1508.16	90.2137	5.30452	1.89986	8.00006	2.90498	0.798586	0.358632	1.20439	0.54565	0.184484	0.077162	0.278232	0.117556	0.784293	0.237113	1.18284	0.364536	0.0452341	0.0163078	0.0682201	0.024931
806	75.508	SS11	66	2	50.526	-145.007	11	2018-08-27 15:20:00	2018-08-27 15:20:00	1766.06	112.064	3.42396	0.884954	6.04693	1.6093	0.508809	0.153179	0.898588	0.276467	0.103774	0.0310143	0.183272	0.0559942	0.683019	0.191343	1.20625	0.346484	0.0452341	0.0163078	0.0798862	0.0292433
805	95.014	SS11	66	2	50.526	-145.007	10	2018-08-27 15:20:00	2018-08-27 15:20:00	1757.12	120.661	1.98637	0.361937	3.49029	0.679632	0.28644	0.0538275	0.503311	0.100699	0.0413552	0.00864884	0.0726662	0.0159954	0.606945	0.159376	1.06648	0.289461	0.0452341	0.0163078	0.0794818	0.02917
804	110.245	SS11	66	2	50.526	-145.007	7	2018-08-27 15:20:00	2018-08-27 15:20:00	1799.1	126.182	1.51303	0.275553	2.72209	0.53124	0.202386	0.0332561	0.364112	0.0650533	0.0186265	0.00427585	0.033511	0.00804374	0.576982	0.164072	1.03805	0.304029	0.0452341	0.0163078	0.0813807	0.0298895
803	125.081	SS11	66	2	50.526	-145.007	6	2018-08-27 15:20:00	2018-08-27 15:20:00	1979.06	140.46	1.36318	0.286629	2.69781	0.598698	0.17123	0.0304229	0.338873	0.0648346	0.0141757	0.00399023	0.0280545	0.00814403	0.557695	0.177618	1.10371	0.360139	0.0452341	0.0163078	0.0895207	0.0328935
802	150.177	SS11	66	2	50.526	-145.007	5	2018-08-27 15:20:00	2018-08-27 15:20:00	1914.35	168.805	1.11696	0.287669	2.13826	0.582083	0.12436	0.0256419	0.238068	0.0533882	0.00948847	0.00344978	0.0181643	0.00679555	0.526488	0.194504	1.00788	0.382809	0.0452341	0.0163078	0.086594	0.0321392
801	195.074	SS11	66	2	50.526	-145.007	3	2018-08-27 15:20:00	2018-08-27 15:20:00	1890.77	293.565	1.03557	0.0809144	1.95802	0.340332	0.125803	0.0164769	0.237865	0.0483168	0.00923448	0.00262506	0.0174603	0.00565547	0.534403	0.203876	1.01044	0.416185	0.0452341	0.0163078	0.0855274	0.0335723
800	331.492	SS11	66	2	50.526	-145.007	2	2018-08-27 15:20:00	2018-08-27 15:20:00	2053.45	373.438	0.929403	0.148975	1.90848	0.462648	0.108219	0.0302844	0.222223	0.0741655	0.00708895	0.000391985	0.0145568	0.00276695	0.521982	0.188324	1.07186	0.433065	0.0452341	0.0163078	0.0928858	0.0375066
811	6.334	SS8	69	2	50.576	-145.089	17	2018-08-28 00:11:00	2018-08-28 00:11:00	328.015	33.3656	5.30452	1.89986	1.73997	0.647829	0.798586	0.358632	0.261949	0.120617	0.184484	0.077162	0.0605137	0.0260481	0.784293	0.237113	0.25726	0.082061	0.0452341	0.0163078	0.0148375	0.00555805
812	21.709	SS8	69	2	50.576	-145.089	16	2018-08-28 00:11:00	2018-08-28 00:11:00	744.755	49.7311	5.30452	1.89986	3.95057	1.43931	0.798586	0.358632	0.594752	0.270029	0.184484	0.077162	0.137396	0.0581946	0.784293	0.237113	0.584107	0.180847	0.0452341	0.0163078	0.0336883	0.0123519
813	37.625	SS8	69	2	50.576	-145.089	15	2018-08-28 00:11:00	2018-08-28 00:11:00	1014.6	64.2497	5.30452	1.89986	5.38195	1.95749	0.798586	0.358632	0.810243	0.367466	0.184484	0.077162	0.187177	0.0791804	0.784293	0.237113	0.795741	0.245795	0.0452341	0.0163078	0.0458943	0.0167991
814	52.325	SS8	69	2	50.576	-145.089	14	2018-08-28 00:11:00	2018-08-28 00:11:00	1216.89	71.9771	5.13255	1.79168	6.24577	2.21136	0.773095	0.336694	0.940775	0.413483	0.17796	0.0721637	0.216558	0.0887448	0.773432	0.232809	0.941185	0.288722	0.0452341	0.0163078	0.055045	0.0201102
815	67.515	SS8	69	2	50.576	-145.089	13	2018-08-28 00:11:00	2018-08-28 00:11:00	1332.66	79.1181	4.01304	1.16259	5.34803	1.58154	0.599929	0.208423	0.799502	0.281784	0.129352	0.0434145	0.172382	0.058755	0.714192	0.205213	0.951775	0.279256	0.0452341	0.0163078	0.0602816	0.0220255
816	80.502	SS8	69	2	50.576	-145.089	12	2018-08-28 00:11:00	2018-08-28 00:11:00	1319.7	87.683	3.0559	0.73017	4.03289	1.00017	0.451877	0.122951	0.596344	0.167026	0.0877936	0.0242214	0.115862	0.032879	0.663542	0.182904	0.875679	0.248292	0.0452341	0.0163078	0.0596956	0.0218839
817	97.312	SS8	69	2	50.576	-145.089	11	2018-08-28 00:11:00	2018-08-28 00:11:00	1210.31	97.9885	1.81701	0.314755	2.19914	0.420504	0.260243	0.045436	0.314975	0.0606165	0.0340016	0.00675152	0.0411524	0.00882456	0.597983	0.155786	0.723744	0.197444	0.0452341	0.0163078	0.0547472	0.0202291
818	112.265	SS8	69	2	50.576	-145.089	10	2018-08-28 00:11:00	2018-08-28 00:11:00	1216.72	104.952	1.49262	0.277557	1.8161	0.372274	0.198144	0.0329193	0.241085	0.0451303	0.0180205	0.00426415	0.0219259	0.00552224	0.574356	0.165994	0.698829	0.210772	0.0452341	0.0163078	0.0550371	0.0204021
819	126.72	SS8	69	2	50.576	-145.089	9	2018-08-28 00:11:00	2018-08-28 00:11:00	1118.34	114.698	1.34663	0.287335	1.50599	0.356533	0.167788	0.0300589	0.187645	0.0387352	0.013684	0.00393032	0.0153034	0.00466727	0.555564	0.179034	0.621311	0.210117	0.0452341	0.0163078	0.0505872	0.0189614
820	146.078	SS8	69	2	50.576	-145.089	8	2018-08-28 00:11:00	2018-08-28 00:11:00	1009.23	147.272	1.15111	0.287889	1.16173	0.336387	0.127136	0.0249912	0.128309	0.031412	0.00948847	0.00344978	0.00957603	0.00375157	0.530399	0.194539	0.535293	0.211303	0.0452341	0.0163078	0.0456515	0.0177554
821	196.243	SS8	69	2	50.576	-145.089	7	2018-08-28 00:11:00	2018-08-28 00:11:00	754.851	181.062	1.03346	0.0759392	0.780111	0.195704	0.12585	0.016233	0.0949978	0.0258724	0.0092263	0.00260332	0.00696448	0.00257922	0.534403	0.203876	0.403395	0.181787	0.0452341	0.0163078	0.034145	0.0147856
822	221.47	SS8	69	2	50.576	-145.089	6	2018-08-28 00:11:00	2018-08-28 00:11:00	727.079	195.007	1.00627	0.0755831	0.731639	0.20378	0.133353	0.0181783	0.0969582	0.0291708	0.0078706	0.00192867	0.00572255	0.00207897	0.531353	0.196126	0.386336	0.17627	0.0452341	0.0163078	0.0328887	0.0147783
823	251.289	SS8	69	2	50.576	-145.089	5	2018-08-28 00:11:00	2018-08-28 00:11:00	402.68	211.247	0.985398	0.0969638	0.3968	0.211793	0.130371	0.0220481	0.0524978	0.0289362	0.00727422	0.00143548	0.00292918	0.00164178	0.528371	0.191874	0.212764	0.13575	0.0452341	0.0163078	0.0182148	0.0115945
824	277.168	SS8	69	2	50.576	-145.089	4	2018-08-28 00:11:00	2018-08-28 00:11:00	533.193	227.376	0.967282	0.114732	0.515748	0.228286	0.127783	0.025248	0.0681331	0.032022	0.00675664	0.00105357	0.0036026	0.00163578	0.525783	0.188213	0.280344	0.156087	0.0452341	0.0163078	0.0241185	0.0134681
825	301.789	SS8	69	2	50.576	-145.089	3	2018-08-28 00:11:00	2018-08-28 00:11:00	571.685	244.868	0.950048	0.130956	0.543128	0.244386	0.125321	0.0281556	0.0716442	0.0346524	0.00702652	0.000427261	0.00401696	0.00173782	0.523321	0.184754	0.299175	0.166063	0.0452341	0.0163078	0.0258596	0.0144777
826	330.726	SS8	69	2	50.576	-145.089	2	2018-08-28 00:11:00	2018-08-28 00:11:00	448.022	349.155	0.92971	0.148937	0.41653	0.3314	0.108158	0.0301927	0.0484572	0.0401135	0.00708436	0.000388475	0.00317395	0.00247966	0.521982	0.188324	0.233859	0.200836	0.0452341	0.0163078	0.0202658	0.0174018
827	500.709	SS8	69	2	50.576	-145.089	1	2018-08-28 00:11:00	2018-08-28 00:11:00	832.929	411.613	0.876803	0.158282	0.730314	0.384229	0.120949	0.0504373	0.100742	0.065141	0.00803236	0.00133428	0.00669039	0.00348801	0.802252	0.183303	0.668219	0.363805	0.0452341	0.0163078	0.0376767	0.0230471
838	6.009	SS12	75	2	50.576	-144.927	24	2018-08-28 15:16:00	2018-08-28 15:16:00	278.653	18.1965	5.30452	1.89986	1.47812	0.53813	0.798586	0.358632	0.222529	0.100985	0.184484	0.077162	0.0514072	0.0217619	0.784293	0.237113	0.218546	0.067596	0.0452341	0.0163078	0.0126046	0.00461817
837	15.568	SS12	75	2	50.576	-144.927	20	2018-08-28 15:16:00	2018-08-28 15:16:00	467.984	25.0789	5.30452	1.89986	2.48243	0.899001	0.798586	0.358632	0.373725	0.169025	0.184484	0.077162	0.0863357	0.0364057	0.784293	0.237113	0.367036	0.112695	0.0452341	0.0163078	0.0211688	0.00771564
836	24.706	SS12	75	2	50.576	-144.927	17	2018-08-28 15:16:00	2018-08-28 15:16:00	778.67	38.9705	5.30452	1.89986	4.13047	1.49374	0.798586	0.358632	0.621835	0.280985	0.184484	0.077162	0.143653	0.0605123	0.784293	0.237113	0.610706	0.187146	0.0452341	0.0163078	0.0352224	0.0128202
834	45.244	SS12	75	2	50.576	-144.927	14	2018-08-28 15:16:00	2018-08-28 15:16:00	1224.38	63.0309	5.30452	1.89986	6.49473	2.35005	0.798586	0.358632	0.97777	0.441976	0.184484	0.077162	0.225878	0.0951882	0.784293	0.237113	0.96027	0.294494	0.0452341	0.0163078	0.0553835	0.0201694
835	75.962	SS12	75	2	50.576	-144.927	11	2018-08-28 15:16:00	2018-08-28 15:16:00	1174.44	88.0166	3.3905	0.870289	3.98194	1.06478	0.503633	0.150294	0.591487	0.181993	0.102322	0.0303665	0.120171	0.0367832	0.681248	0.190568	0.800085	0.231704	0.0452341	0.0163078	0.0531247	0.019562
833	94.811	SS12	75	2	50.576	-144.927	10	2018-08-28 15:16:00	2018-08-28 15:16:00	1210.61	97.9794	2.00133	0.366251	2.42283	0.484813	0.288755	0.0546024	0.34957	0.0719024	0.0420048	0.00882392	0.0508515	0.0114477	0.607737	0.159695	0.735734	0.202291	0.0452341	0.0163078	0.0547609	0.0202338
832	109.888	SS12	75	2	50.576	-144.927	7	2018-08-28 15:16:00	2018-08-28 15:16:00	1072.51	106.057	1.51663	0.275183	1.62661	0.336123	0.203135	0.033314	0.217865	0.0417224	0.0187336	0.00427703	0.020092	0.00499897	0.577446	0.16373	0.619318	0.185976	0.0452341	0.0163078	0.0485141	0.0181364
831	124.907	SS12	75	2	50.576	-144.927	6	2018-08-28 15:16:00	2018-08-28 15:16:00	1140.55	118.484	1.36494	0.286548	1.55678	0.364647	0.171595	0.030461	0.195713	0.040254	0.0142279	0.00399625	0.0162276	0.00485968	0.557921	0.177467	0.636336	0.212931	0.0452341	0.0163078	0.0515916	0.0193566
830	150.85	SS12	75	2	50.576	-144.927	5	2018-08-28 15:16:00	2018-08-28 15:16:00	1162.15	151.026	1.11517	0.283516	1.296	0.370037	0.124034	0.0255702	0.144146	0.0351279	0.00948847	0.00344978	0.011027	0.00425757	0.526488	0.194504	0.611859	0.23962	0.0452341	0.0163078	0.0525688	0.0201458
829	196.606	SS12	75	2	50.576	-144.927	3	2018-08-28 15:16:00	2018-08-28 15:16:00	419.253	290.763	1.03281	0.0743983	0.433008	0.301918	0.125864	0.0161572	0.0527689	0.0372183	0.00922376	0.00259657	0.00386709	0.00289445	0.534403	0.203876	0.22405	0.177343	0.0452341	0.0163078	0.0189645	0.0148233
828	331.271	SS12	75	2	50.576	-144.927	2	2018-08-28 15:16:00	2018-08-28 15:16:00	366.319	337.085	0.929492	0.148964	0.34049	0.318034	0.108202	0.0302579	0.0396363	0.0381202	0.00708763	0.000390972	0.00259633	0.00239342	0.521982	0.188324	0.191212	0.188993	0.0452341	0.0163078	0.0165701	0.0163762
840 avg	26.582	SS7	77	2	50.629	-145.007	16	2018-08-28 23:17:00	2018-08-28 23:17:00	899.028	17.1823	5.30452	1.89986	4.76892	1.71046	0.798586	0.358632	0.717952	0.322712	0.184484	0.077162	0.165857	0.0694432	0.784293	0.237113	0.705102	0.213597	0.0452341	0.0163078	0.0406667	0.0146818
842 avg	42.169	SS7	77	2	50.629	-145.007	14	2018-08-28 23:17:00	2018-08-28 23:17:00	1145.31	17.8004	5.30452	1.89986	6.07534	2.17798	0.798586	0.358632	0.914631	0.410991	0.184484	0.077162	0.211292	0.0884355	0.784293	0.237113	0.89826	0.271927	0.0452341	0.0163078	0.0518071	0.0186949
846 avg	56.238	SS7	77	2	50.629	-145.007	10	2018-08-28 23:17:00	2018-08-28 23:17:00	1253.2	20.1202	4.84416	1.61691	6.07071	2.02866	0.728487	0.300734	0.91294	0.377165	0.165438	0.0641082	0.207328	0.0804094	0.758172	0.225545	0.950142	0.283065	0.0452341	0.0163078	0.0566874	0.0204572
848 avg	96.687	SS7	77	2	50.629	-145.007	8	2018-08-28 23:17:00	2018-08-28 23:17:00	1341.82	27.0399	1.86307	0.327286	2.49991	0.442041	0.267368	0.0476491	0.358761	0.0643442	0.0360016	0.00725216	0.0483078	0.00977969	0.600421	0.156759	0.805659	0.210969	0.0452341	0.0163078	0.0606962	0.0219164
850 avg	147.103	SS7	77	2	50.629	-145.007	6	2018-08-28 23:17:00	2018-08-28 23:17:00	2146.65	48.217	1.14076	0.287518	2.44881	0.619645	0.124984	0.0246834	0.268296	0.0533281	0.00948847	0.00344978	0.0203684	0.00741958	0.529066	0.195298	1.13572	0.420011	0.0452341	0.0163078	0.0971017	0.035075
853 avg	331.424	SS7	77	2	50.629	-145.007	3	2018-08-28 23:17:00	2018-08-28 23:17:00	2822.34	60.9012	0.92943	0.148971	2.62317	0.424241	0.108214	0.0302763	0.305417	0.0857038	0.00708854	0.000391673	0.0200063	0.00118674	0.521982	0.188324	1.47321	0.532466	0.0452341	0.0163078	0.127666	0.0461086
854 avg	500.565	SS7	77	2	50.629	-145.007	2	2018-08-28 23:17:00	2018-08-28 23:17:00	3060.16	66.6616	0.876803	0.158282	2.68316	0.487881	0.120949	0.0504373	0.370123	0.154557	0.00803236	0.00133428	0.0245803	0.00411807	0.802252	0.183303	2.45502	0.563482	0.0452341	0.0163078	0.138423	0.0499955
861	7.79	SS5	100	3	50.746	-144.87	13	2018-08-31 11:55:00	2018-08-31 11:55:00	303.013	27.9408	5.30452	1.89986	1.60734	0.594456	0.798586	0.358632	0.241982	0.110937	0.184484	0.077162	0.0559012	0.0239426	0.784293	0.237113	0.237651	0.0751159	0.0452341	0.0163078	0.0137065	0.00510055
862	21.683	SS5	100	3	50.746	-144.87	12	2018-08-31 11:55:00	2018-08-31 11:55:00	606.78	46.3361	5.30452	1.89986	3.21868	1.17871	0.798586	0.358632	0.484566	0.220734	0.184484	0.077162	0.111941	0.0475943	0.784293	0.237113	0.475893	0.148394	0.0452341	0.0163078	0.0274471	0.0101148
863	36.321	SS5	100	3	50.746	-144.87	11	2018-08-31 11:55:00	2018-08-31 11:55:00	983.752	54.0742	5.30452	1.89986	5.21834	1.89088	0.798586	0.358632	0.785611	0.355438	0.184484	0.077162	0.181487	0.076561	0.784293	0.237113	0.77155	0.237085	0.0452341	0.0163078	0.0444991	0.0162282
864	52.482	SS5	100	3	50.746	-144.87	10	2018-08-31 11:55:00	2018-08-31 11:55:00	1248.16	62.6105	5.12098	1.7845	6.3918	2.25029	0.771305	0.335213	0.962712	0.421177	0.177458	0.0718318	0.221495	0.0903433	0.77282	0.232515	0.964603	0.294222	0.0452341	0.0163078	0.0564593	0.0205508
865	67.474	SS5	100	3	50.746	-144.87	9	2018-08-31 11:55:00	2018-08-31 11:55:00	1369.5	70.9641	4.01607	1.16411	5.50002	1.61953	0.600396	0.208728	0.822245	0.289012	0.129483	0.043483	0.177328	0.0602549	0.714351	0.205286	0.978307	0.285673	0.0452341	0.0163078	0.0619482	0.0225631
866	83.49	SS5	100	3	50.746	-144.87	8	2018-08-31 11:55:00	2018-08-31 11:55:00	1219.13	94.0177	2.83569	0.644431	3.45708	0.82965	0.417814	0.106441	0.509371	0.135582	0.078232	0.0205082	0.0953752	0.0260617	0.651889	0.177939	0.794739	0.225423	0.0452341	0.0163078	0.0551463	0.0203312
868	113.485	SS5	100	3	50.746	-144.87	6	2018-08-31 11:55:00	2018-08-31 11:55:00	1169.31	108.716	1.4803	0.278692	1.73094	0.36345	0.195582	0.0327084	0.228696	0.0437594	0.0176545	0.00425292	0.0206436	0.00533053	0.57277	0.167143	0.669747	0.205123	0.0452341	0.0163078	0.0528928	0.0196928
869	128.253	SS5	100	3	50.746	-144.87	5	2018-08-31 11:55:00	2018-08-31 11:55:00	1129.33	125.093	1.33114	0.287903	1.50331	0.365298	0.164569	0.0297092	0.185853	0.0393638	0.0132241	0.00386918	0.0149344	0.00467224	0.553571	0.180343	0.625166	0.215118	0.0452341	0.0163078	0.0510843	0.0192666
870	148.408	SS5	100	3	50.746	-144.87	4	2018-08-31 11:55:00	2018-08-31 11:55:00	1170.05	151.851	1.12758	0.286987	1.31933	0.376925	0.122243	0.0242857	0.143031	0.0339415	0.00948847	0.00344978	0.011102	0.00428587	0.52737	0.196254	0.61705	0.243192	0.0452341	0.0163078	0.0529262	0.0202797
871	198.2	SS5	100	3	50.746	-144.87	3	2018-08-31 11:55:00	2018-08-31 11:55:00	426.42	297.225	1.02994	0.0676543	0.439187	0.30748	0.125928	0.0158241	0.0536982	0.0380323	0.0092126	0.002567	0.00392844	0.0029489	0.534403	0.203876	0.22788	0.181073	0.0452341	0.0163078	0.0192887	0.0151366
872	332.7	SS5	100	3	50.746	-144.87	2	2018-08-31 11:55:00	2018-08-31 11:55:00	-484.405	492.213	0.92892	0.149033	-0.449974	-0.462891	0.108316	0.0304292	-0.0524688	-0.0553147	0.0070962	0.000397529	-0.00343744	-0.00349815	0.521982	0.188324	-0.252851	-0.272641	0.0452341	0.0163078	-0.0219116	-0.0236247
873	501.602	SS5	100	3	50.746	-144.87	1	2018-08-31 11:55:00	2018-08-31 11:55:00	-144.202	534.47	0.876803	0.158282	-0.126437	-0.46918	0.120949	0.0504373	-0.0174411	-0.0650514	0.00803236	0.00133428	-0.00115829	-0.00429737	0.802252	0.183303	-0.115687	-0.429594	0.0452341	0.0163078	-0.00652286	-0.0242904
884	4.555	SS7	101	3	50.644	-144.869	24	2018-08-31 15:35:00	2018-08-31 15:35:00	324.943	36.0999	5.30452	1.89986	1.72367	0.646363	0.798586	0.358632	0.259495	0.120048	0.184484	0.077162	0.0599469	0.0259426	0.784293	0.237113	0.25485	0.0820855	0.0452341	0.0163078	0.0146985	0.005545
883	24.545	SS7	101	3	50.644	-144.869	20	2018-08-31 15:35:00	2018-08-31 15:35:00	593.515	57.6358	5.30452	1.89986	3.14832	1.16831	0.798586	0.358632	0.473973	0.217773	0.184484	0.077162	0.109494	0.047015	0.784293	0.237113	0.46549	0.147812	0.0452341	0.0163078	0.0268471	0.0100239
882	49.553	SS7	101	3	50.644	-144.869	17	2018-08-31 15:35:00	2018-08-31 15:35:00	958.749	78.5344	5.30452	1.89986	5.08571	1.86852	0.798586	0.358632	0.765644	0.349511	0.184484	0.077162	0.176874	0.0753843	0.784293	0.237113	0.75194	0.235528	0.0452341	0.0163078	0.0433681	0.0160336
881	65.074	SS7	101	3	50.644	-144.869	14	2018-08-31 15:35:00	2018-08-31 15:35:00	1127.39	82.3125	4.19295	1.25472	4.72709	1.45606	0.627756	0.226978	0.707727	0.261058	0.137163	0.0475764	0.154637	0.0548126	0.723711	0.209539	0.815906	0.243627	0.0452341	0.0163078	0.0509965	0.0187585
880	74.681	SS7	101	3	50.644	-144.869	11	2018-08-31 15:35:00	2018-08-31 15:35:00	1150	88.6695	3.48491	0.911973	4.00764	1.09334	0.518237	0.158503	0.59597	0.187981	0.106421	0.0322101	0.122384	0.0382246	0.686244	0.192757	0.789179	0.22987	0.0452341	0.0163078	0.052019	0.019178
879	94.539	SS7	101	3	50.644	-144.869	10	2018-08-31 15:35:00	2018-08-31 15:35:00	1128.88	99.6072	2.02138	0.372069	2.28189	0.465786	0.291855	0.0556492	0.32947	0.0692216	0.0428752	0.00906041	0.048401	0.0110839	0.608798	0.160123	0.68726	0.19066	0.0452341	0.0163078	0.0510639	0.0189529
878	110.179	SS7	101	3	50.644	-144.869	7	2018-08-31 15:35:00	2018-08-31 15:35:00	1129.63	111.793	1.51369	0.275485	1.70992	0.354231	0.202524	0.0332668	0.228778	0.0438727	0.0186463	0.00427609	0.0210635	0.00526101	0.577067	0.164009	0.651875	0.196181	0.0452341	0.0163078	0.0510979	0.0191033
877	124.355	SS7	101	3	50.644	-144.869	6	2018-08-31 15:35:00	2018-08-31 15:35:00	1222.22	120.84	1.37051	0.286283	1.67507	0.387116	0.172755	0.0305809	0.211144	0.0428113	0.0143935	0.00401496	0.017592	0.00520629	0.558639	0.176986	0.68278	0.226605	0.0452341	0.0163078	0.055286	0.0206677
876	148.258	SS7	101	3	50.644	-144.869	5	2018-08-31 15:35:00	2018-08-31 15:35:00	1212.12	151.209	1.12909	0.287051	1.3686	0.387572	0.122558	0.0243317	0.148556	0.0348321	0.00948847	0.00344978	0.0115012	0.00442085	0.527565	0.196145	0.639474	0.250778	0.0452341	0.0163078	0.0548293	0.020917
875	196.081	SS7	101	3	50.644	-144.869	3	2018-08-31 15:35:00	2018-08-31 15:35:00	1325.41	348.64	1.03375	0.0766275	1.37015	0.374444	0.125843	0.0162668	0.166794	0.0488852	0.00922743	0.00260633	0.0122302	0.00472046	0.534403	0.203876	0.708305	0.328225	0.0452341	0.0163078	0.0599539	0.0267562
874	330.707	SS7	101	3	50.644	-144.869	2	2018-08-31 15:35:00	2018-08-31 15:35:00	1542.57	386.872	0.929717	0.148937	1.43415	0.426794	0.108157	0.0301904	0.166839	0.0626071	0.00708424	0.000388388	0.0109279	0.00280541	0.521982	0.188324	0.805193	0.353797	0.0452341	0.0163078	0.0697766	0.0306441
885	5.631	SS3	102	3	50.644	-145.028	13	2018-08-31 18:26:00	2018-08-31 18:26:00	304.707	27.9108	5.30452	1.89986	1.61633	0.597533	0.798586	0.358632	0.243335	0.111528	0.184484	0.077162	0.0562137	0.024069	0.784293	0.237113	0.23898	0.0754934	0.0452341	0.0163078	0.0137831	0.00512698
886	20.214	SS3	102	3	50.644	-145.028	12	2018-08-31 18:26:00	2018-08-31 18:26:00	582.749	39.4582	5.30452	1.89986	3.09121	1.12675	0.798586	0.358632	0.465375	0.211354	0.184484	0.077162	0.107508	0.0455515	0.784293	0.237113	0.457046	0.1416	0.0452341	0.0163078	0.0263601	0.00966952
887	35.098	SS3	102	3	50.644	-145.028	11	2018-08-31 18:26:00	2018-08-31 18:26:00	877.801	50.245	5.30452	1.89986	4.65632	1.68886	0.798586	0.358632	0.701	0.317354	0.184484	0.077162	0.161941	0.0683642	0.784293	0.237113	0.688453	0.211836	0.0452341	0.0163078	0.0397065	0.0144943
888	50.128	SS3	102	3	50.644	-145.028	10	2018-08-31 18:26:00	2018-08-31 18:26:00	1097.94	60.3857	5.30452	1.89986	5.82406	2.11039	0.798586	0.358632	0.876801	0.396699	0.184484	0.077162	0.202553	0.0854486	0.784293	0.237113	0.861108	0.264609	0.0452341	0.0163078	0.0496643	0.0181122
889	65.008	SS3	102	3	50.644	-145.028	9	2018-08-31 18:26:00	2018-08-31 18:26:00	1194.13	69.6282	4.19781	1.25726	5.01275	1.52952	0.628509	0.227491	0.750524	0.275157	0.137374	0.0476913	0.164044	0.0577476	0.723969	0.209656	0.864516	0.255382	0.0452341	0.0163078	0.0540155	0.0197268
890	80.453	SS3	102	3	50.644	-145.028	8	2018-08-31 18:26:00	2018-08-31 18:26:00	1341.48	77.5021	3.05951	0.731619	4.10426	1.00969	0.452436	0.123231	0.606932	0.168989	0.0879504	0.0242845	0.117983	0.0332826	0.663733	0.182986	0.890382	0.250803	0.0452341	0.0163078	0.0606804	0.0221557
891	94.566	SS3	102	3	50.644	-145.028	7	2018-08-31 18:26:00	2018-08-31 18:26:00	1341.34	88.9018	2.01939	0.371489	2.70868	0.529646	0.291548	0.0555448	0.391064	0.0788841	0.0427888	0.00903684	0.0573942	0.0127043	0.608693	0.16008	0.816462	0.221436	0.0452341	0.0163078	0.0606741	0.0222409
892	109.821	SS3	102	3	50.644	-145.028	6	2018-08-31 18:26:00	2018-08-31 18:26:00	1413.67	96.5243	1.51731	0.275113	2.14497	0.415581	0.203276	0.0333248	0.287365	0.051033	0.0187537	0.00427722	0.0265115	0.00631173	0.577533	0.163666	0.81644	0.237991	0.0452341	0.0163078	0.063946	0.0234637
893	124.691	SS3	102	3	50.644	-145.028	5	2018-08-31 18:26:00	2018-08-31 18:26:00	1304.46	109.44	1.36712	0.286446	1.78336	0.402499	0.172049	0.030508	0.224431	0.0440261	0.0142927	0.00400365	0.0186443	0.00545182	0.558202	0.177279	0.728153	0.239187	0.0452341	0.0163078	0.0590061	0.0218413
894	146.864	SS3	102	3	50.644	-145.028	4	2018-08-31 18:26:00	2018-08-31 18:26:00	1419.67	152.723	1.14317	0.287608	1.62293	0.444069	0.125486	0.0247555	0.178149	0.0400304	0.00948847	0.00344978	0.0134705	0.00510745	0.529377	0.195122	0.751543	0.288566	0.0452341	0.0163078	0.0642177	0.0241605
895	196.532	SS3	102	3	50.644	-145.028	3	2018-08-31 18:26:00	2018-08-31 18:26:00	1524.99	317.57	1.03294	0.0747123	1.57523	0.347255	0.125861	0.0161726	0.191937	0.0469665	0.00922428	0.00259795	0.0140669	0.0049272	0.534403	0.203876	0.814959	0.354212	0.0452341	0.0163078	0.0689814	0.0287199
896	331.15	SS3	102	3	50.644	-145.028	2	2018-08-31 18:26:00	2018-08-31 18:26:00	2005.3	551.827	0.92954	0.148958	1.864	0.59358	0.108192	0.0302435	0.216957	0.0851031	0.0070869	0.000390417	0.0142113	0.00398834	0.521982	0.188324	1.04673	0.474959	0.0452341	0.0163078	0.0907076	0.0411399
897	500.73	SS3	102	3	50.644	-145.028	1	2018-08-31 18:26:00	2018-08-31 18:26:00	1052.81	599.49	0.876803	0.158282	0.92311	0.551417	0.120949	0.0504373	0.127337	0.0898725	0.00803236	0.00133428	0.00845658	0.00501604	0.802252	0.183303	0.844621	0.518216	0.0452341	0.0163078	0.047623	0.0320956
898	7.665	SS8	104	3	50.594	-144.949	13	2018-09-01 00:19:00	2018-09-01 00:19:00	302.859	29.0088	5.30452	1.89986	1.60652	0.59561	0.798586	0.358632	0.241859	0.111058	0.184484	0.077162	0.0558727	0.0239741	0.784293	0.237113	0.23753	0.0753296	0.0452341	0.0163078	0.0136995	0.0051103
899	21.59	SS8	104	3	50.594	-144.949	12	2018-09-01 00:19:00	2018-09-01 00:19:00	620.67	41.3186	5.30452	1.89986	3.29236	1.19938	0.798586	0.358632	0.495659	0.225024	0.184484	0.077162	0.114504	0.048495	0.784293	0.237113	0.486787	0.150695	0.0452341	0.0163078	0.0280754	0.0102929
900	37.292	SS8	104	3	50.594	-144.949	11	2018-09-01 00:19:00	2018-09-01 00:19:00	879.782	52.301	5.30452	1.89986	4.66682	1.69433	0.798586	0.358632	0.702582	0.31827	0.184484	0.077162	0.162306	0.068568	0.784293	0.237113	0.690007	0.212602	0.0452341	0.0163078	0.0397961	0.0145411
901	53.821	SS8	104	3	50.594	-144.949	10	2018-09-01 00:19:00	2018-09-01 00:19:00	1083.86	63.2974	5.02229	1.72382	5.44347	1.89523	0.756041	0.322707	0.819443	0.353028	0.173173	0.0690307	0.187695	0.0756184	0.767598	0.230019	0.83197	0.253999	0.0452341	0.0163078	0.0490274	0.0179058
902	68.906	SS8	104	3	50.594	-144.949	9	2018-09-01 00:19:00	2018-09-01 00:19:00	1190.45	72.8927	3.91053	1.11163	4.6553	1.3537	0.584072	0.198202	0.695309	0.23976	0.124901	0.0411214	0.148688	0.0497925	0.708767	0.202767	0.843753	0.246852	0.0452341	0.0163078	0.053849	0.0196917
903	83.189	SS8	104	3	50.594	-144.949	8	2018-09-01 00:19:00	2018-09-01 00:19:00	1163.53	82.7132	2.85787	0.652835	3.32523	0.795527	0.421245	0.108051	0.490133	0.13046	0.0791952	0.0208704	0.0921463	0.0251514	0.653063	0.178436	0.759861	0.214529	0.0452341	0.0163078	0.0526313	0.01934
904	98.41	SS8	104	3	50.594	-144.949	7	2018-09-01 00:19:00	2018-09-01 00:19:00	1214.18	89.5553	1.73608	0.293286	2.10791	0.388562	0.247726	0.041673	0.300783	0.0552482	0.030488	0.00589985	0.0370178	0.00766616	0.593701	0.154084	0.720857	0.194493	0.0452341	0.0163078	0.0549221	0.0202107
905	112.711	SS8	104	3	50.594	-144.949	6	2018-09-01 00:19:00	2018-09-01 00:19:00	1255.97	96.8554	1.48812	0.277979	1.86903	0.377713	0.197207	0.0328428	0.247685	0.0454571	0.0178867	0.00426041	0.0224651	0.00562439	0.573776	0.166415	0.720643	0.216274	0.0452341	0.0163078	0.0568125	0.0209454
906	128.273	SS8	104	3	50.594	-144.949	5	2018-09-01 00:19:00	2018-09-01 00:19:00	1444.36	106.812	1.33094	0.287909	1.92237	0.439474	0.164527	0.0297046	0.237637	0.0463638	0.0132181	0.00386835	0.0190918	0.00576293	0.553545	0.18036	0.799521	0.267132	0.0452341	0.0163078	0.0653345	0.0240449
907	148.414	SS8	104	3	50.594	-144.949	4	2018-09-01 00:19:00	2018-09-01 00:19:00	1307.62	165.809	1.12752	0.286984	1.47437	0.419257	0.122231	0.0242839	0.159831	0.0376705	0.00948847	0.00344978	0.0124073	0.00477747	0.527362	0.196259	0.689589	0.27112	0.0452341	0.0163078	0.0591489	0.022605
908	198.192	SS8	104	3	50.594	-144.949	3	2018-09-01 00:19:00	2018-09-01 00:19:00	1146.2	286.972	1.02995	0.067688	1.18053	0.305581	0.125928	0.0158258	0.144338	0.0404348	0.00921266	0.00256715	0.0105596	0.00395571	0.534403	0.203876	0.612533	0.279511	0.0452341	0.0163078	0.0518473	0.0227573
909	331.421	SS8	104	3	50.594	-144.949	2	2018-09-01 00:19:00	2018-09-01 00:19:00	2474.3	455.388	0.929432	0.148971	2.2997	0.561256	0.108214	0.0302759	0.267753	0.0896672	0.00708853	0.000391659	0.0175392	0.00337036	0.521982	0.188324	1.29154	0.5231	0.0452341	0.0163078	0.111923	0.0453043
910	502.189	SS8	104	3	50.594	-144.949	1	2018-09-01 00:19:00	2018-09-01 00:19:00	2875.28	499.491	0.876803	0.158282	2.52106	0.631605	0.120949	0.0504373	0.347762	0.157102	0.00803236	0.00133428	0.0230953	0.00555113	0.802252	0.183303	2.3067	0.662084	0.0452341	0.0163078	0.130061	0.0520492
957	5.7	SS4	106	3	50.695	-144.949	24	2018-09-01 03:05:00	2018-09-01 03:05:00	359.127	27.8938	5.30452	1.89986	1.905	0.698152	0.798586	0.358632	0.286794	0.130707	0.184484	0.077162	0.0662534	0.0281847	0.784293	0.237113	0.281661	0.0879191	0.0452341	0.0163078	0.0162448	0.00599096
956	25.223	SS4	106	3	50.695	-144.949	20	2018-09-01 03:05:00	2018-09-01 03:05:00	852.859	47.2636	5.30452	1.89986	4.52401	1.6396	0.798586	0.358632	0.681082	0.308182	0.184484	0.077162	0.157339	0.0663834	0.784293	0.237113	0.668892	0.205593	0.0452341	0.0163078	0.0385783	0.0140716
955	49.844	SS4	106	3	50.695	-144.949	17	2018-09-01 03:05:00	2018-09-01 03:05:00	1203.78	60.3503	5.30452	1.89986	6.3855	2.30932	0.798586	0.358632	0.961325	0.434397	0.184484	0.077162	0.222079	0.0935512	0.784293	0.237113	0.944119	0.289331	0.0452341	0.0163078	0.054452	0.01982
954	64.709	SS4	106	3	50.695	-144.949	14	2018-09-01 03:05:00	2018-09-01 03:05:00	1297.36	72.3714	4.21985	1.26879	5.47468	1.67418	0.631917	0.229821	0.819827	0.301648	0.138331	0.0482138	0.179466	0.0633469	0.725135	0.210189	0.940764	0.277695	0.0452341	0.0163078	0.058685	0.0214089
953	74.716	SS4	106	3	50.695	-144.949	11	2018-09-01 03:05:00	2018-09-01 03:05:00	1436.06	86.7232	3.48233	0.910822	5.00083	1.3424	0.517838	0.158276	0.743645	0.231687	0.106309	0.0321591	0.152666	0.0470936	0.686108	0.192697	0.98529	0.283049	0.0452341	0.0163078	0.0649587	0.0237453
952	95.166	SS4	106	3	50.695	-144.949	10	2018-09-01 03:05:00	2018-09-01 03:05:00	1616.83	96.005	1.97517	0.358722	3.1935	0.610203	0.284708	0.0532509	0.460323	0.0903321	0.0408688	0.00851855	0.0660777	0.014321	0.606353	0.159138	0.980366	0.263801	0.0452341	0.0163078	0.0731356	0.0267221
951	109.127	SS4	106	3	50.695	-144.949	7	2018-09-01 03:05:00	2018-09-01 03:05:00	1621.22	102.643	1.52432	0.274377	2.47125	0.471539	0.204733	0.0334359	0.331917	0.0581376	0.0189619	0.00427865	0.0307414	0.0072045	0.578435	0.162998	0.937769	0.270843	0.0452341	0.0163078	0.0733342	0.0268431
950	124.493	SS4	106	3	50.695	-144.949	6	2018-09-01 03:05:00	2018-09-01 03:05:00	1625.81	125.546	1.36912	0.286351	2.22593	0.49627	0.172465	0.030551	0.280395	0.0541844	0.0143521	0.00401034	0.0233338	0.00676445	0.558459	0.177106	0.907948	0.296354	0.0452341	0.0163078	0.0735419	0.0271148
949	149.344	SS4	106	3	50.695	-144.949	5	2018-09-01 03:05:00	2018-09-01 03:05:00	1880.19	171.134	1.11813	0.286566	2.10228	0.571767	0.120278	0.0239965	0.226144	0.0495915	0.00948847	0.00344978	0.0178401	0.00668639	0.526153	0.196934	0.989265	0.381064	0.0452341	0.0163078	0.0850484	0.0316238
948	194.957	SS4	106	3	50.695	-144.949	3	2018-09-01 03:05:00	2018-09-01 03:05:00	560.577	321.318	1.03578	0.0814134	0.580633	0.335928	0.125798	0.0165014	0.0705197	0.0414661	0.0092353	0.00262723	0.0051771	0.00331284	0.534403	0.203876	0.299574	0.20627	0.0452341	0.0163078	0.0253572	0.0171704
947	331.051	SS4	106	3	50.695	-144.949	2	2018-09-01 03:05:00	2018-09-01 03:05:00	852.839	393.419	0.92958	0.148953	0.792781	0.387149	0.108184	0.0302316	0.0922636	0.0497619	0.00708631	0.000389964	0.00604348	0.00280765	0.521982	0.188324	0.445166	0.260706	0.0452341	0.0163078	0.0385773	0.022586
959	19.762	SS6	107	3	50.694	-144.788	12	2018-09-01 09:13:00	2018-09-01 09:13:00	916.371	58.3661	5.30452	1.89986	4.86091	1.76829	0.798586	0.358632	0.731801	0.331929	0.184484	0.077162	0.169056	0.0715241	0.784293	0.237113	0.718703	0.222053	0.0452341	0.0163078	0.0414512	0.0151754
961	50.002	SS6	107	3	50.694	-144.788	10	2018-09-01 09:13:00	2018-09-01 09:13:00	1288.93	73.6661	5.30452	1.89986	6.83714	2.47976	0.798586	0.358632	1.02932	0.465978	0.184484	0.077162	0.237787	0.10038	0.784293	0.237113	1.0109	0.311034	0.0452341	0.0163078	0.0583033	0.021282
962	64.837	SS6	107	3	50.694	-144.788	9	2018-09-01 09:13:00	2018-09-01 09:13:00	1500.3	80.2858	4.21041	1.26385	6.3169	1.92605	0.630458	0.228822	0.945879	0.347014	0.137922	0.0479898	0.206924	0.0728458	0.724636	0.209961	1.08717	0.320332	0.0452341	0.0163078	0.0678648	0.0247347
963	80.636	SS6	107	3	50.694	-144.788	8	2018-09-01 09:13:00	2018-09-01 09:13:00	1641.68	95.9136	3.04603	0.726215	5.0006	1.22749	0.45035	0.122185	0.73933	0.205187	0.0873648	0.0240493	0.143425	0.0403607	0.66302	0.18268	1.08847	0.306571	0.0452341	0.0163078	0.0742599	0.0271215
965	110.965	SS6	107	3	50.694	-144.788	6	2018-09-01 09:13:00	2018-09-01 09:13:00	1668.1	109.795	1.50575	0.276286	2.51175	0.489628	0.200874	0.0331378	0.335078	0.0595147	0.0184105	0.00427266	0.0307106	0.00740834	0.576045	0.16476	0.960904	0.282021	0.0452341	0.0163078	0.0754551	0.0276528
966	124.675	SS6	107	3	50.694	-144.788	5	2018-09-01 09:13:00	2018-09-01 09:13:00	1607.63	121.228	1.36728	0.286438	2.19809	0.48941	0.172083	0.0305115	0.276645	0.0533031	0.0142975	0.00400419	0.0229851	0.00666652	0.558223	0.177265	0.897416	0.292901	0.0452341	0.0163078	0.0727196	0.0267843
967	151.163	SS6	107	3	50.694	-144.788	4	2018-09-01 09:13:00	2018-09-01 09:13:00	1630.13	151.133	1.11461	0.281983	1.81695	0.489563	0.124047	0.0255068	0.202212	0.0456104	0.00948847	0.00344978	0.0154674	0.00580353	0.526488	0.194504	0.858243	0.326898	0.0452341	0.0163078	0.0737373	0.0274488
968	195.645	SS6	107	3	50.694	-144.788	3	2018-09-01 09:13:00	2018-09-01 09:13:00	1497.36	277.157	1.03454	0.0784818	1.54908	0.309877	0.125826	0.0163578	0.188406	0.0426156	0.00923049	0.00261443	0.0138213	0.00467655	0.534403	0.203876	0.800193	0.339309	0.0452341	0.0163078	0.0677316	0.027449
969	330.259	SS6	107	3	50.694	-144.788	2	2018-09-01 09:13:00	2018-09-01 09:13:00	1777.68	469.931	0.939781	0.150368	1.67063	0.516229	0.10761	0.0289389	0.191296	0.072137	0.00702652	0.000427261	0.0124909	0.00338821	0.521982	0.188324	0.927919	0.415028	0.0452341	0.0163078	0.0804119	0.0359484
970	500.476	SS6	107	3	50.694	-144.788	1	2018-09-01 09:13:00	2018-09-01 09:13:00	1860.61	518.079	0.876803	0.158282	1.63139	0.541365	0.120949	0.0504373	0.225039	0.112841	0.00803236	0.00133428	0.0149451	0.00484566	0.802252	0.183303	1.49268	0.53765	0.0452341	0.0163078	0.0841631	0.0383388
971	6.792	SS13	109	3	50.643	-144.71	13	2018-09-01 23:02:00	2018-09-01 23:02:00	298.746	27.1005	5.30452	1.89986	1.58471	0.585498	0.798586	0.358632	0.238575	0.109304	0.184484	0.077162	0.055114	0.0235878	0.784293	0.237113	0.234305	0.0739567	0.0452341	0.0163078	0.0135135	0.00502376
972	22.064	SS13	109	3	50.643	-144.71	12	2018-09-01 23:02:00	2018-09-01 23:02:00	699.5	38.0158	5.30452	1.89986	3.71051	1.34417	0.798586	0.358632	0.558611	0.252693	0.184484	0.077162	0.129047	0.0544285	0.784293	0.237113	0.548613	0.168519	0.0452341	0.0163078	0.0316412	0.0115362
973	36.842	SS13	109	3	50.643	-144.71	11	2018-09-01 23:02:00	2018-09-01 23:02:00	995.034	47.5164	5.30452	1.89986	5.27818	1.90716	0.798586	0.358632	0.794621	0.358863	0.184484	0.077162	0.183568	0.0772776	0.784293	0.237113	0.780398	0.238861	0.0452341	0.0163078	0.0450094	0.0163686
974	51.916	SS13	109	3	50.643	-144.71	10	2018-09-01 23:02:00	2018-09-01 23:02:00	1232.5	55.6876	5.16269	1.81045	6.36302	2.24983	0.777758	0.34057	0.958587	0.421982	0.179269	0.0730317	0.220949	0.0905636	0.775028	0.233574	0.955223	0.291098	0.0452341	0.0163078	0.055751	0.0202566
975	66.177	SS13	109	3	50.643	-144.71	9	2018-09-01 23:02:00	2018-09-01 23:02:00	1467.08	64.4722	4.11166	1.21267	6.03211	1.79872	0.615182	0.218496	0.902519	0.322995	0.133634	0.0456741	0.196051	0.067559	0.71941	0.207579	1.05543	0.308046	0.0452341	0.0163078	0.0663618	0.0241019
976	82.935	SS13	109	3	50.643	-144.71	8	2018-09-01 23:02:00	2018-09-01 23:02:00	1626.71	73.8531	2.87659	0.659968	4.67938	1.0944	0.424141	0.109419	0.689955	0.180728	0.080008	0.021178	0.13015	0.0349536	0.654054	0.178856	1.06396	0.29493	0.0452341	0.0163078	0.0735828	0.0267376
977	98.298	SS13	109	3	50.643	-144.71	7	2018-09-01 23:02:00	2018-09-01 23:02:00	1561.59	83.3251	1.74434	0.295444	2.72395	0.483717	0.249003	0.0420495	0.388841	0.0688643	0.0308464	0.0059851	0.0481696	0.00969328	0.594138	0.154257	0.927803	0.245922	0.0452341	0.0163078	0.0706373	0.0257436
978	112.324	SS13	109	3	50.643	-144.71	6	2018-09-01 23:02:00	2018-09-01 23:02:00	1687.47	90.7916	1.49203	0.277614	2.51775	0.487657	0.19802	0.0329092	0.334152	0.058371	0.0180028	0.00426368	0.0303792	0.00737815	0.574279	0.16605	0.969078	0.285014	0.0452341	0.0163078	0.0763311	0.0278237
979	126.921	SS13	109	3	50.643	-144.71	5	2018-09-01 23:02:00	2018-09-01 23:02:00	1680.56	101.126	1.3446	0.287415	2.25968	0.501792	0.167366	0.0300135	0.281268	0.0532034	0.0136237	0.00392258	0.0228954	0.00673456	0.555303	0.179206	0.933219	0.306358	0.0452341	0.0163078	0.0760185	0.0277854
980	147.6	SS13	109	3	50.643	-144.71	4	2018-09-01 23:02:00	2018-09-01 23:02:00	1764.42	133.567	1.13574	0.287323	2.00392	0.529169	0.12394	0.0245327	0.218682	0.0463436	0.00948847	0.00344978	0.0167417	0.0062174	0.52842	0.195663	0.932356	0.352374	0.0452341	0.0163078	0.079812	0.0294013
981	197.047	SS13	109	3	50.643	-144.71	3	2018-09-01 23:02:00	2018-09-01 23:02:00	1605.13	163.546	1.03202	0.0725289	1.65652	0.205038	0.125882	0.0160651	0.202057	0.0329968	0.00922067	0.00258838	0.0148004	0.00441991	0.534403	0.203876	0.857788	0.338718	0.0452341	0.0163078	0.0726066	0.0272015
1026	4.695	SS12	111	3	50.593	-144.791	24	2018-09-02 15:29:00	2018-09-02 15:29:00	428.045	26.167	5.30452	1.89986	2.27057	0.824986	0.798586	0.358632	0.341831	0.154926	0.184484	0.077162	0.0789676	0.0333797	0.784293	0.237113	0.335712	0.103549	0.0452341	0.0163078	0.0193622	0.00708011
1025	26.136	SS12	111	3	50.593	-144.791	20	2018-09-02 15:29:00	2018-09-02 15:29:00	725.889	37.084	5.30452	1.89986	3.8505	1.39305	0.798586	0.358632	0.579685	0.262006	0.184484	0.077162	0.133915	0.0564273	0.784293	0.237113	0.56931	0.174558	0.0452341	0.0163078	0.0328349	0.0119559
1024	32.769	SS12	111	3	50.593	-144.791	17	2018-09-02 15:29:00	2018-09-02 15:29:00	1100.96	51.2854	5.30452	1.89986	5.84006	2.10928	0.798586	0.358632	0.87921	0.396957	0.184484	0.077162	0.20311	0.0854773	0.784293	0.237113	0.863474	0.264132	0.0452341	0.0163078	0.0498008	0.0181035
1023	60.568	SS12	111	3	50.593	-144.791	14	2018-09-02 15:29:00	2018-09-02 15:29:00	1377.55	65.8833	4.52504	1.4338	6.23347	1.99751	0.679125	0.2633	0.935528	0.365459	0.151582	0.0557197	0.208812	0.0774037	0.741285	0.217633	1.02116	0.303752	0.0452341	0.0163078	0.0623122	0.0226616
1022	75.135	SS12	111	3	50.593	-144.791	11	2018-09-02 15:29:00	2018-09-02 15:29:00	1513.44	76.8367	3.45145	0.897092	5.22355	1.38335	0.513061	0.155569	0.776485	0.238721	0.104968	0.0315512	0.158862	0.048427	0.684473	0.19198	1.03591	0.295271	0.0452341	0.0163078	0.0684589	0.0249244
1021	95.337	SS12	111	3	50.593	-144.791	10	2018-09-02 15:29:00	2018-09-02 15:29:00	1520.3	88.1278	1.96256	0.355121	2.98369	0.56692	0.282758	0.0526059	0.429879	0.0837691	0.0403216	0.00837277	0.0613011	0.0132158	0.605686	0.158869	0.920827	0.247358	0.0452341	0.0163078	0.0687695	0.0251113
1020	110.619	SS12	111	3	50.593	-144.791	7	2018-09-02 15:29:00	2018-09-02 15:29:00	1527.71	94.9766	1.50925	0.275936	2.3057	0.445255	0.2016	0.0331949	0.307987	0.0542065	0.0185143	0.00427433	0.0282845	0.00676256	0.576495	0.16443	0.880718	0.2571	0.0452341	0.0163078	0.0691046	0.0252813
1019	125.654	SS12	111	3	50.593	-144.791	6	2018-09-02 15:29:00	2018-09-02 15:29:00	1596.76	105.999	1.35739	0.286888	2.16743	0.480154	0.170027	0.0302968	0.271491	0.0516247	0.0140038	0.00396992	0.0223606	0.00651048	0.55695	0.178115	0.889313	0.290469	0.0452341	0.0163078	0.0722277	0.0264774
1018	150.383	SS12	111	3	50.593	-144.791	5	2018-09-02 15:29:00	2018-09-02 15:29:00	1461.64	138.004	1.11696	0.287669	1.63259	0.447832	0.12436	0.0256419	0.181769	0.0412217	0.00948847	0.00344978	0.0138687	0.00520957	0.526488	0.194504	0.769535	0.293432	0.0452341	0.0163078	0.0661158	0.02464
1017	196.302	SS12	111	3	50.593	-144.791	3	2018-09-02 15:29:00	2018-09-02 15:29:00	1823.32	256.72	1.03336	0.0756886	1.88414	0.299033	0.125852	0.0162206	0.229468	0.0438014	0.00922589	0.00260222	0.0168217	0.00530298	0.534403	0.203876	0.974387	0.396239	0.0452341	0.0163078	0.082476	0.0319215
1016	330.357	SS12	111	3	50.593	-144.791	2	2018-09-02 15:29:00	2018-09-02 15:29:00	2314.25	296.037	0.939781	0.150368	2.17489	0.445531	0.10761	0.0289389	0.249036	0.0741624	0.00702652	0.000427261	0.0162611	0.00230316	0.521982	0.188324	1.208	0.462413	0.0452341	0.0163078	0.104683	0.0400456
1027	7.874	SS14	113	3	50.592	-144.64	13	2018-09-02 23:45:00	2018-09-02 23:45:00	361.274	26.6439	5.30452	1.89986	1.91639	0.700771	0.798586	0.358632	0.288509	0.1313	0.184484	0.077162	0.0666494	0.0283066	0.784293	0.237113	0.283345	0.0881747	0.0452341	0.0163078	0.0163419	0.0060136
1028	21.617	SS14	113	3	50.592	-144.64	12	2018-09-02 23:45:00	2018-09-02 23:45:00	648.144	39.2078	5.30452	1.89986	3.4381	1.24882	0.798586	0.358632	0.517599	0.234544	0.184484	0.077162	0.119573	0.0505324	0.784293	0.237113	0.508335	0.15673	0.0452341	0.0163078	0.0293182	0.0107176
1029	38.065	SS14	113	3	50.592	-144.64	11	2018-09-02 23:45:00	2018-09-02 23:45:00	905.787	50.0444	5.30452	1.89986	4.80477	1.74122	0.798586	0.358632	0.723349	0.327293	0.184484	0.077162	0.167104	0.0704994	0.784293	0.237113	0.710402	0.218331	0.0452341	0.0163078	0.0409724	0.0149439
1030	52.576	SS14	113	3	50.592	-144.64	10	2018-09-02 23:45:00	2018-09-02 23:45:00	1103.38	58.4629	5.11405	1.7802	5.64273	1.98686	0.770234	0.334327	0.849858	0.371627	0.177157	0.0716334	0.195471	0.0797144	0.772454	0.23234	0.852308	0.260306	0.0452341	0.0163078	0.0499102	0.018187
1031	67.905	SS14	113	3	50.592	-144.64	9	2018-09-02 23:45:00	2018-09-02 23:45:00	1434.19	64.2925	3.9843	1.14819	5.71425	1.66653	0.595483	0.205532	0.854037	0.297247	0.128104	0.0427659	0.183726	0.0618849	0.71267	0.204526	1.02211	0.296887	0.0452341	0.0163078	0.0648743	0.0235686
1032	83.041	SS14	113	3	50.592	-144.64	8	2018-09-02 23:45:00	2018-09-02 23:45:00	1414.1	74.5384	2.86878	0.656987	4.05673	0.953333	0.422933	0.108847	0.598067	0.157115	0.0796688	0.0210494	0.112659	0.0303525	0.65364	0.178681	0.924309	0.257327	0.0452341	0.0163078	0.0639653	0.023306
1033	97.873	SS14	113	3	50.592	-144.64	7	2018-09-02 23:45:00	2018-09-02 23:45:00	1388.76	82.6585	1.77566	0.303699	2.46597	0.446574	0.253848	0.0434934	0.352534	0.0639427	0.0322064	0.00631195	0.044727	0.00916111	0.595795	0.154915	0.827417	0.220705	0.0452341	0.0163078	0.0628193	0.0229542
1034	112.446	SS14	113	3	50.592	-144.64	6	2018-09-02 23:45:00	2018-09-02 23:45:00	1402.75	90.4423	1.4908	0.277729	2.09121	0.412257	0.197763	0.0328883	0.277413	0.04948	0.0179662	0.00426268	0.0252021	0.00619632	0.57412	0.166165	0.805347	0.238802	0.0452341	0.0163078	0.0634521	0.0232387
1035	127.155	SS14	113	3	50.592	-144.64	5	2018-09-02 23:45:00	2018-09-02 23:45:00	1205.94	112.842	1.34223	0.287505	1.61866	0.378354	0.166875	0.0299606	0.201241	0.0407433	0.0135535	0.00391347	0.0163447	0.00496105	0.554999	0.179407	0.669296	0.225236	0.0452341	0.0163078	0.0545497	0.0203179
1036	147.473	SS14	113	3	50.592	-144.64	4	2018-09-02 23:45:00	2018-09-02 23:45:00	1095.7	146.474	1.13702	0.287374	1.24584	0.356208	0.124207	0.0245713	0.136094	0.0324935	0.00948847	0.00344978	0.0103966	0.00402734	0.528585	0.19557	0.579173	0.227845	0.0452341	0.0163078	0.0495631	0.0190574
1037	197.68	SS14	113	3	50.592	-144.64	3	2018-09-02 23:45:00	2018-09-02 23:45:00	1044.33	267.018	1.03088	0.0698503	1.07657	0.284764	0.125907	0.0159328	0.131489	0.0375117	0.00921624	0.00257664	0.0096248	0.00364647	0.534403	0.203876	0.558093	0.256309	0.0452341	0.0163078	0.0472393	0.020879
1038	332.046	SS14	113	3	50.592	-144.64	2	2018-09-02 23:45:00	2018-09-02 23:45:00	1268.16	452.656	0.929182	0.149001	1.17835	0.461095	0.108264	0.0303508	0.137296	0.0623142	0.00709228	0.000394526	0.00899415	0.00324911	0.521982	0.188324	0.661957	0.335954	0.0452341	0.0163078	0.0573641	0.0291023
1039	503.45	SS14	113	3	50.592	-144.64	1	2018-09-02 23:45:00	2018-09-02 23:45:00	1834.39	497.183	0.876803	0.158282	1.6084	0.523774	0.120949	0.0504373	0.221867	0.110346	0.00803236	0.00133428	0.0147345	0.00468393	0.802252	0.183303	1.47164	0.521688	0.0452341	0.0163078	0.0829769	0.0374257
1040	8.627	SS15	114	3	50.543	-144.71	13	2018-09-03 01:45:00	2018-09-03 01:45:00	403.567	25.704	5.30452	1.89986	2.14073	0.778751	0.798586	0.358632	0.322283	0.14618	0.184484	0.077162	0.0744519	0.031499	0.784293	0.237113	0.316515	0.0977915	0.0452341	0.0163078	0.018255	0.00668321
1041	22.056	SS15	114	3	50.543	-144.71	12	2018-09-03 01:45:00	2018-09-03 01:45:00	656.669	46.1322	5.30452	1.89986	3.48332	1.27135	0.798586	0.358632	0.524407	0.238366	0.184484	0.077162	0.121145	0.0513796	0.784293	0.237113	0.515021	0.159853	0.0452341	0.0163078	0.0297038	0.0109103
1042	37.37	SS15	114	3	50.543	-144.71	11	2018-09-03 01:45:00	2018-09-03 01:45:00	880.778	62.6471	5.30452	1.89986	4.67211	1.70603	0.798586	0.358632	0.703378	0.319812	0.184484	0.077162	0.16249	0.0689383	0.784293	0.237113	0.690788	0.214546	0.0452341	0.0163078	0.0398412	0.0146404
1043	52.497	SS15	114	3	50.543	-144.71	10	2018-09-03 01:45:00	2018-09-03 01:45:00	1003.36	77.0588	5.11987	1.78381	5.13708	1.83277	0.771134	0.335071	0.773726	0.341409	0.17741	0.0718001	0.178006	0.0733271	0.772762	0.232487	0.775359	0.24075	0.0452341	0.0163078	0.0453861	0.0167298
1044	67.159	SS15	114	3	50.543	-144.71	9	2018-09-03 01:45:00	2018-09-03 01:45:00	1148.08	83.0981	4.03928	1.17582	4.6374	1.39103	0.603987	0.21108	0.693424	0.247479	0.130491	0.0440106	0.149814	0.051678	0.71558	0.205841	0.821541	0.243688	0.0452341	0.0163078	0.0519322	0.0190962
1045	82.285	SS15	114	3	50.543	-144.71	8	2018-09-03 01:45:00	2018-09-03 01:45:00	1112.77	90.9071	2.9245	0.678389	3.2543	0.80034	0.431551	0.112957	0.480218	0.131676	0.082088	0.0219741	0.0913453	0.0255655	0.656589	0.179934	0.730634	0.208933	0.0452341	0.0163078	0.0503352	0.018607
1046	97.536	SS15	114	3	50.543	-144.71	7	2018-09-03 01:45:00	2018-09-03 01:45:00	1046.48	98.1197	1.8005	0.310319	1.88418	0.369686	0.25769	0.0446553	0.269667	0.0531326	0.0332848	0.00657489	0.0348318	0.00761624	0.59711	0.155438	0.624863	0.172892	0.0452341	0.0163078	0.0473365	0.0176335
1047	111.89	SS15	114	3	50.543	-144.71	6	2018-09-03 01:45:00	2018-09-03 01:45:00	965.634	111.106	1.49641	0.277197	1.44499	0.315104	0.198931	0.032983	0.192095	0.0387673	0.018133	0.00426697	0.0175098	0.00458651	0.574843	0.165639	0.555088	0.172227	0.0452341	0.0163078	0.0436795	0.0165299
1048	126.055	SS15	114	3	50.543	-144.71	5	2018-09-03 01:45:00	2018-09-03 01:45:00	941.052	119.576	1.35334	0.287061	1.27357	0.314902	0.169185	0.0302078	0.159211	0.0348909	0.0138835	0.00395531	0.0130651	0.00407559	0.556428	0.178461	0.523628	0.180641	0.0452341	0.0163078	0.0425676	0.0162718
1049	146.155	SS15	114	3	50.543	-144.71	4	2018-09-03 01:45:00	2018-09-03 01:45:00	915.928	149.557	1.15033	0.287862	1.05362	0.314826	0.126975	0.0249682	0.1163	0.0297256	0.00948847	0.00344978	0.00869076	0.00346378	0.530299	0.194596	0.485715	0.195085	0.0452341	0.0163078	0.0414311	0.0163974
1050	199.208	SS15	114	3	50.543	-144.71	3	2018-09-03 01:45:00	2018-09-03 01:45:00	1132.22	267.63	1.02813	0.0634084	1.16406	0.284369	0.125968	0.0156133	0.142623	0.0380665	0.00920554	0.00254833	0.0104227	0.003794	0.534403	0.203876	0.605059	0.271548	0.0452341	0.0163078	0.0512147	0.0220788
1051	332.857	SS15	114	3	50.543	-144.71	2	2018-09-03 01:45:00	2018-09-03 01:45:00	1436.4	445.676	0.928857	0.14904	1.33421	0.466049	0.108329	0.030448	0.155603	0.0651437	0.00709714	0.00039825	0.0101943	0.00321434	0.521982	0.188324	0.749776	0.356783	0.0452341	0.0163078	0.0649743	0.0309051
1052	502.681	SS15	114	3	50.543	-144.71	1	2018-09-03 01:45:00	2018-09-03 01:45:00	1034.51	498.726	0.876803	0.158282	0.907061	0.466936	0.120949	0.0504373	0.125123	0.0797563	0.00803236	0.00133428	0.00830956	0.00423709	0.802252	0.183303	0.829938	0.442767	0.0452341	0.0163078	0.0467951	0.0281699
1095	5.424	SS16	115	3	50.491	-144.791	24	2018-09-03 15:25:00	2018-09-03 15:25:00	314.348	31.2724	5.30452	1.89986	1.66746	0.619827	0.798586	0.358632	0.251034	0.115468	0.184484	0.077162	0.0579923	0.0249324	0.784293	0.237113	0.246541	0.0784676	0.0452341	0.0163078	0.0142192	0.00531792
1094	19.609	SS16	115	3	50.491	-144.791	20	2018-09-03 15:25:00	2018-09-03 15:25:00	514.066	40.8448	5.30452	1.89986	2.72687	1.0004	0.798586	0.358632	0.410526	0.187224	0.184484	0.077162	0.0948372	0.0403757	0.784293	0.237113	0.403178	0.126031	0.0452341	0.0163078	0.0232533	0.00858447
1093	29.401	SS16	115	3	50.491	-144.791	17	2018-09-03 15:25:00	2018-09-03 15:25:00	864.147	54.9137	5.30452	1.89986	4.58389	1.6674	0.798586	0.358632	0.690096	0.312998	0.184484	0.077162	0.159422	0.0674445	0.784293	0.237113	0.677745	0.209378	0.0452341	0.0163078	0.0390889	0.0143096
1092	59.242	SS16	115	3	50.491	-144.791	14	2018-09-03 15:25:00	2018-09-03 15:25:00	1149.4	91.18	4.62276	1.48873	5.31339	1.76229	0.694241	0.2745	0.797958	0.321797	0.155826	0.05823	0.179105	0.0684208	0.746456	0.220042	0.857974	0.261913	0.0452341	0.0163078	0.0519919	0.0191926
1091	75.31	SS16	115	3	50.491	-144.791	11	2018-09-03 15:25:00	2018-09-03 15:25:00	1228.76	100.534	3.43855	0.891387	4.22516	1.14856	0.511066	0.154445	0.627978	0.196608	0.104408	0.0312988	0.128292	0.0398654	0.683791	0.191681	0.840216	0.245357	0.0452341	0.0163078	0.0555818	0.0205479
1090	95.331	SS16	115	3	50.491	-144.791	10	2018-09-03 15:25:00	2018-09-03 15:25:00	1263.16	108.28	1.96301	0.355247	2.47959	0.496529	0.282827	0.0526284	0.357255	0.0731928	0.0403408	0.00837787	0.0509568	0.0114486	0.605709	0.158879	0.765107	0.211134	0.0452341	0.0163078	0.0571378	0.0211737
1089	110.251	SS16	115	3	50.491	-144.791	7	2018-09-03 15:25:00	2018-09-03 15:25:00	1286.05	120.86	1.51296	0.27556	1.94575	0.398779	0.202373	0.0332551	0.260262	0.0492679	0.0186247	0.00427583	0.0239524	0.00594183	0.576974	0.164078	0.742019	0.222237	0.0452341	0.0163078	0.0581734	0.0216736
1088	125.197	SS16	115	3	50.491	-144.791	6	2018-09-03 15:25:00	2018-09-03 15:25:00	1169.19	132.887	1.36201	0.286682	1.59245	0.380931	0.170986	0.0303975	0.199916	0.042183	0.0141409	0.00398617	0.0165334	0.00502517	0.557544	0.177719	0.651875	0.220601	0.0452341	0.0163078	0.0528872	0.019992
1087	150.289	SS16	115	3	50.491	-144.791	5	2018-09-03 15:25:00	2018-09-03 15:25:00	1259.18	183.421	1.11696	0.287669	1.40645	0.416149	0.12436	0.0256419	0.156591	0.0395322	0.00948847	0.00344978	0.0119476	0.00467955	0.526488	0.194504	0.662941	0.263265	0.0452341	0.0163078	0.0569576	0.0221472
1086	195.78	SS16	115	3	50.491	-144.791	3	2018-09-03 15:25:00	2018-09-03 15:25:00	1185.95	285.731	1.0343	0.0779074	1.22662	0.309636	0.125831	0.0163296	0.149229	0.0408378	0.00922954	0.00261192	0.0109457	0.00406814	0.534403	0.203876	0.633773	0.285966	0.0452341	0.0163078	0.0536452	0.0232614
1085	330.684	SS16	115	3	50.491	-144.791	2	2018-09-03 15:25:00	2018-09-03 15:25:00	1250.29	377.081	0.929726	0.148935	1.16243	0.396968	0.108155	0.0301877	0.135225	0.0555683	0.0070841	0.000388283	0.00885722	0.00271504	0.521982	0.188324	0.652631	0.306894	0.0452341	0.0163078	0.0565559	0.0265833
1096	5.052	SS17	116	3	50.441	-144.87	13	2018-09-03 18:24:00	2018-09-03 18:24:00	250.075	27.8794	5.30452	1.89986	1.32653	0.497592	0.798586	0.358632	0.199706	0.092407	0.184484	0.077162	0.0461349	0.01997	0.784293	0.237113	0.196132	0.0631991	0.0452341	0.0163078	0.0113119	0.00426871
1097	20.062	SS17	116	3	50.441	-144.87	12	2018-09-03 18:24:00	2018-09-03 18:24:00	543.637	40.8324	5.30452	1.89986	2.88373	1.0553	0.798586	0.358632	0.434141	0.197674	0.184484	0.077162	0.100293	0.0426191	0.784293	0.237113	0.426371	0.132822	0.0452341	0.0163078	0.0245909	0.00905589
1098	34.795	SS17	116	3	50.441	-144.87	11	2018-09-03 18:24:00	2018-09-03 18:24:00	758.474	49.7318	5.30452	1.89986	4.02334	1.46494	0.798586	0.358632	0.605707	0.274897	0.184484	0.077162	0.139927	0.0592401	0.784293	0.237113	0.594866	0.184025	0.0452341	0.0163078	0.0343088	0.012572
1099	49.966	SS17	116	3	50.441	-144.87	10	2018-09-03 18:24:00	2018-09-03 18:24:00	964.148	61.4805	5.30452	1.89986	5.11434	1.86055	0.798586	0.358632	0.769955	0.349242	0.184484	0.077162	0.17787	0.0752552	0.784293	0.237113	0.756174	0.233642	0.0452341	0.0163078	0.0436123	0.0159672
1100	64.492	SS17	116	3	50.441	-144.87	9	2018-09-03 18:24:00	2018-09-03 18:24:00	1077.76	70.2483	4.23584	1.27719	4.56524	1.40831	0.634391	0.231519	0.683725	0.253471	0.139026	0.0485946	0.149837	0.0532763	0.725981	0.210576	0.782437	0.232611	0.0452341	0.0163078	0.0487517	0.0178609
1101	79.699	SS17	116	3	50.441	-144.87	8	2018-09-03 18:24:00	2018-09-03 18:24:00	1152.54	79.6056	3.11508	0.754089	3.59027	0.903804	0.461031	0.127589	0.531358	0.151562	0.0903632	0.0252642	0.104147	0.0299934	0.666674	0.184249	0.76837	0.218886	0.0452341	0.0163078	0.0521342	0.0191373
1102	95.928	SS17	116	3	50.441	-144.87	7	2018-09-03 18:24:00	2018-09-03 18:24:00	1088.79	89.0614	1.91901	0.342806	2.0894	0.410514	0.276021	0.0504063	0.300529	0.060136	0.0384304	0.00787559	0.0418427	0.00923272	0.603381	0.157944	0.656956	0.180169	0.0452341	0.0163078	0.0492504	0.0182071
1103	110.436	SS17	116	3	50.441	-144.87	6	2018-09-03 18:24:00	2018-09-03 18:24:00	1010.96	100.361	1.5111	0.27575	1.52767	0.317354	0.201984	0.0332249	0.204199	0.0392321	0.0185692	0.00427511	0.0187728	0.00470666	0.576733	0.164255	0.583057	0.175855	0.0452341	0.0163078	0.04573	0.0171002
1104	125.791	SS17	116	3	50.441	-144.87	5	2018-09-03 18:24:00	2018-09-03 18:24:00	999.088	110.209	1.35601	0.286948	1.35477	0.323299	0.169739	0.0302665	0.169584	0.0355575	0.0139627	0.00396497	0.01395	0.00424974	0.556772	0.178233	0.556264	0.188347	0.0452341	0.0163078	0.0451928	0.0170386
1105	145.551	SS17	116	3	50.441	-144.87	4	2018-09-03 18:24:00	2018-09-03 18:24:00	761.86	147.344	1.15643	0.288064	0.881041	0.277846	0.128243	0.0251479	0.0977031	0.0269096	0.00948847	0.00344978	0.00722889	0.00297696	0.531084	0.194147	0.404611	0.167337	0.0452341	0.0163078	0.034462	0.0140991
1106	195.569	SS17	116	3	50.441	-144.87	3	2018-09-03 18:24:00	2018-09-03 18:24:00	1070.79	269.286	1.03468	0.0788053	1.10792	0.291122	0.125823	0.0163737	0.13473	0.0381498	0.00923102	0.00261585	0.00988448	0.00374498	0.534403	0.203876	0.572233	0.261473	0.0452341	0.0163078	0.0484362	0.0212909
1107	328.879	SS17	116	3	50.441	-144.87	2	2018-09-03 18:24:00	2018-09-03 18:24:00	1139.72	468.256	0.939781	0.150368	1.07109	0.472251	0.10761	0.0289389	0.122645	0.0602234	0.00702652	0.000427261	0.00800826	0.00332605	0.521982	0.188324	0.594912	0.325285	0.0452341	0.0163078	0.0515541	0.0281796
1108	499.541	SS17	116	3	50.441	-144.87	1	2018-09-03 18:24:00	2018-09-03 18:24:00	771.246	524.489	0.876803	0.158282	0.67623	0.4758	0.120949	0.0504373	0.0932812	0.0744133	0.00803236	0.00133428	0.00619493	0.00433675	0.802252	0.183303	0.618733	0.443886	0.0452341	0.0163078	0.0348866	0.0268524
1109	7.126	SS10	118	3	50.491	-144.954	13	2018-09-03 23:50:00	2018-09-03 23:50:00	275.39	29.145	5.30452	1.89986	1.46082	0.545567	0.798586	0.358632	0.219923	0.101469	0.184484	0.077162	0.0508053	0.0219194	0.784293	0.237113	0.215987	0.0691839	0.0452341	0.0163078	0.012457	0.00468052
1110	22.463	SS10	118	3	50.491	-144.954	12	2018-09-03 23:50:00	2018-09-03 23:50:00	485.862	42.7276	5.30452	1.89986	2.57727	0.950489	0.798586	0.358632	0.388003	0.177555	0.184484	0.077162	0.0896341	0.0383098	0.784293	0.237113	0.381059	0.119979	0.0452341	0.0163078	0.0219775	0.00815568
1111	37.255	SS10	118	3	50.491	-144.954	11	2018-09-03 23:50:00	2018-09-03 23:50:00	715.04	50.9991	5.30452	1.89986	3.79295	1.38515	0.798586	0.358632	0.571022	0.25965	0.184484	0.077162	0.131914	0.0559704	0.784293	0.237113	0.560801	0.1742	0.0452341	0.0163078	0.0323442	0.0118868
1112	52.145	SS10	118	3	50.491	-144.954	10	2018-09-03 23:50:00	2018-09-03 23:50:00	916.086	59.8199	5.14581	1.79993	4.71401	1.67738	0.775147	0.338397	0.710102	0.31345	0.178536	0.0725451	0.163554	0.0673102	0.774135	0.233146	0.709174	0.218544	0.0452341	0.0163078	0.0414383	0.0151824
1113	67.274	SS10	118	3	50.491	-144.954	9	2018-09-03 23:50:00	2018-09-03 23:50:00	941.135	70.3481	4.03081	1.17154	3.79353	1.13845	0.602676	0.21022	0.5672	0.202337	0.130123	0.0438176	0.122463	0.0422421	0.715131	0.205638	0.673035	0.199965	0.0452341	0.0163078	0.0425713	0.0156743
1114	82.179	SS10	118	3	50.491	-144.954	8	2018-09-03 23:50:00	2018-09-03 23:50:00	951.681	79.1255	2.93231	0.681416	2.79062	0.688748	0.432759	0.11354	0.411849	0.113349	0.0824272	0.022105	0.0784444	0.0220248	0.657002	0.18011	0.625256	0.179117	0.0452341	0.0163078	0.0430484	0.0159272
1115	97.048	SS10	118	3	50.491	-144.954	7	2018-09-03 23:50:00	2018-09-03 23:50:00	1031.25	86.5635	1.83646	0.320021	1.89384	0.366312	0.263253	0.0463645	0.271478	0.052966	0.0348464	0.00696159	0.0359352	0.00778706	0.599013	0.156197	0.617729	0.169217	0.0452341	0.0163078	0.0466474	0.0172672
1116	111.786	SS10	118	3	50.491	-144.954	6	2018-09-03 23:50:00	2018-09-03 23:50:00	935.01	95.7637	1.49746	0.277096	1.40014	0.296126	0.199149	0.0330005	0.186207	0.0362739	0.0181642	0.0042677	0.0169837	0.004353	0.574978	0.165541	0.537611	0.164284	0.0452341	0.0163078	0.0422943	0.0158513
1117	128.043	SS10	118	3	50.491	-144.954	5	2018-09-03 23:50:00	2018-09-03 23:50:00	942.886	104.588	1.33327	0.28783	1.25712	0.305119	0.16501	0.0297576	0.155585	0.0329407	0.0132871	0.00387785	0.0125282	0.00391155	0.553844	0.180165	0.522212	0.179479	0.0452341	0.0163078	0.0426505	0.0160877
1118	148.168	SS10	118	3	50.491	-144.954	4	2018-09-03 23:50:00	2018-09-03 23:50:00	743.298	141.451	1.13	0.287089	0.839929	0.266618	0.122747	0.0243593	0.0912377	0.0250858	0.00948847	0.00344978	0.00705276	0.00289423	0.527682	0.196079	0.392225	0.163747	0.0452341	0.0163078	0.0336224	0.0137066
1119	197.589	SS10	118	3	50.491	-144.954	3	2018-09-03 23:50:00	2018-09-03 23:50:00	859.703	304.469	1.03104	0.0702351	0.886388	0.319674	0.125904	0.0159518	0.10824	0.040713	0.00921688	0.00257833	0.00792378	0.00357608	0.534403	0.203876	0.459428	0.239155	0.0452341	0.0163078	0.0388879	0.0196529
1120	332.231	SS10	118	3	50.491	-144.954	2	2018-09-03 23:50:00	2018-09-03 23:50:00	214.002	361.284	0.929108	0.14901	0.198831	0.337183	0.108278	0.030373	0.0231719	0.0396556	0.00709339	0.000395375	0.001518	0.00256412	0.521982	0.188324	0.111705	0.192842	0.0452341	0.0163078	0.0096802	0.0167108
1133	5.1	SS11	119	3	50.543	-144.869	23	2018-09-04 04:07:00	2018-09-04 04:07:00	197.205	18.3255	5.30452	1.89986	1.04608	0.387067	0.798586	0.358632	0.157485	0.0722222	0.184484	0.077162	0.0363813	0.0155878	0.784293	0.237113	0.154667	0.0489189	0.0452341	0.0163078	0.00892038	0.0033211
1132	15.225	SS11	119	3	50.543	-144.869	21	2018-09-04 04:07:00	2018-09-04 04:07:00	426.299	25.9438	5.30452	1.89986	2.26131	0.821518	0.798586	0.358632	0.340437	0.154282	0.184484	0.077162	0.0786455	0.0332404	0.784293	0.237113	0.334343	0.103109	0.0452341	0.0163078	0.0192832	0.00705036
1131	25.502	SS11	119	3	50.543	-144.869	19	2018-09-04 04:07:00	2018-09-04 04:07:00	697.255	43.4978	5.30452	1.89986	3.69861	1.34463	0.798586	0.358632	0.556819	0.252459	0.184484	0.077162	0.128633	0.0543968	0.784293	0.237113	0.546853	0.168811	0.0452341	0.0163078	0.0315397	0.0115397
1130	50.068	SS11	119	3	50.543	-144.869	17	2018-09-04 04:07:00	2018-09-04 04:07:00	912.884	70.9165	5.30452	1.89986	4.84242	1.77468	0.798586	0.358632	0.729017	0.332252	0.184484	0.077162	0.168413	0.0716446	0.784293	0.237113	0.715969	0.223488	0.0452341	0.0163078	0.0412935	0.0152288
1129	75.134	SS11	119	3	50.543	-144.869	15	2018-09-04 04:07:00	2018-09-04 04:07:00	942.378	89.5689	3.45152	0.897124	3.25264	0.900181	0.513072	0.155575	0.483508	0.153644	0.104971	0.0315526	0.0989225	0.0311856	0.684477	0.191982	0.645036	0.191025	0.0452341	0.0163078	0.0426276	0.0158932
1128	95.048	SS11	119	3	50.543	-144.869	13	2018-09-04 04:07:00	2018-09-04 04:07:00	920.102	99.8689	1.98386	0.361216	1.82536	0.38693	0.286053	0.0536983	0.263198	0.0570724	0.0412464	0.00861964	0.0379509	0.00893689	0.606813	0.159323	0.55833	0.158626	0.0452341	0.0163078	0.04162	0.0156701
1127	110.06	SS11	119	3	50.543	-144.869	11	2018-09-04 04:07:00	2018-09-04 04:07:00	787.069	107.8	1.51489	0.275362	1.19233	0.271367	0.202774	0.0332862	0.159597	0.0341201	0.018682	0.0042765	0.014704	0.00392239	0.577222	0.163895	0.454313	0.14322	0.0452341	0.0163078	0.0356023	0.0137304
1126	125.057	SS11	119	3	50.543	-144.869	9	2018-09-04 04:07:00	2018-09-04 04:07:00	691.489	119.902	1.36342	0.286618	0.942793	0.256915	0.17128	0.0304282	0.118438	0.0294019	0.0141829	0.00399106	0.00980732	0.00324164	0.557726	0.177597	0.385661	0.139833	0.0452341	0.0163078	0.0312788	0.0125132
1125	149.504	SS11	119	3	50.543	-144.869	7	2018-09-04 04:07:00	2018-09-04 04:07:00	504.103	163.594	1.11696	0.287669	0.563063	0.233278	0.12436	0.0256419	0.06269	0.0241036	0.00948847	0.00344978	0.00478316	0.00233104	0.526488	0.194504	0.265404	0.130507	0.0452341	0.0163078	0.0228026	0.0110608
1124	195.378	SS11	119	3	50.543	-144.869	5	2018-09-04 04:07:00	2018-09-04 04:07:00	221.506	275.959	1.03502	0.0796187	0.229263	0.286167	0.125815	0.0164135	0.0278688	0.0349097	0.00923235	0.0026194	0.00204502	0.00261299	0.534403	0.203876	0.118374	0.154233	0.0452341	0.0163078	0.0100196	0.0129949
1123	330.149	SS11	119	3	50.543	-144.869	3	2018-09-04 04:07:00	2018-09-04 04:07:00	-274.528	466.498	0.939781	0.150368	-0.257996	-0.440345	0.10761	0.0289389	-0.0295419	-0.0508245	0.00702652	0.000427261	-0.00192898	-0.00327996	0.521982	0.188324	-0.143299	-0.248932	0.0452341	0.0163078	-0.012418	-0.0215713
1122	499.728	SS11	119	3	50.543	-144.869	1	2018-09-04 04:07:00	2018-09-04 04:07:00	-311.619	531.486	0.876803	0.158282	-0.273228	-0.468612	0.120949	0.0504373	-0.0376899	-0.0661762	0.00803236	0.00133428	-0.00250304	-0.00428929	0.802252	0.183303	-0.249997	-0.430195	0.0452341	0.0163078	-0.0140958	-0.0245725
1205	5.833	SS1	120	3	50.592	-144.87	13	2018-09-04 15:31:00	2018-09-04 15:31:00	299.364	25.317	5.30452	1.89986	1.58798	0.58439	0.798586	0.358632	0.239068	0.109249	0.184484	0.077162	0.055228	0.023567	0.784293	0.237113	0.234789	0.073708	0.0452341	0.0163078	0.0135415	0.00501449
1206	20.336	SS1	120	3	50.592	-144.87	12	2018-09-04 15:31:00	2018-09-04 15:31:00	545.199	38.0973	5.30452	1.89986	2.89202	1.05533	0.798586	0.358632	0.435388	0.197879	0.184484	0.077162	0.100581	0.0426517	0.784293	0.237113	0.427596	0.132682	0.0452341	0.0163078	0.0246616	0.00905647
1207	35.526	SS1	120	3	50.592	-144.87	11	2018-09-04 15:31:00	2018-09-04 15:31:00	825.612	48.3614	5.30452	1.89986	4.37948	1.58939	0.798586	0.358632	0.659323	0.298599	0.184484	0.077162	0.152313	0.0643276	0.784293	0.237113	0.647522	0.199404	0.0452341	0.0163078	0.0373458	0.0136405
1208	50.588	SS1	120	3	50.592	-144.87	10	2018-09-04 15:31:00	2018-09-04 15:31:00	923.58	60.3294	5.26056	1.87208	4.85855	1.75791	0.792897	0.353307	0.732304	0.329794	0.183518	0.075884	0.169494	0.070954	0.780207	0.236068	0.720583	0.22305	0.0452341	0.0163078	0.0417773	0.0153068
1209	65.724	SS1	120	3	50.592	-144.87	9	2018-09-04 15:31:00	2018-09-04 15:31:00	989.391	70.0312	4.14504	1.22985	4.10107	1.25095	0.620346	0.22196	0.613765	0.223862	0.135083	0.046451	0.13365	0.0469217	0.721176	0.208383	0.713525	0.212268	0.0452341	0.0163078	0.0447542	0.0164428
1210	80.73	SS1	120	3	50.592	-144.87	8	2018-09-04 15:31:00	2018-09-04 15:31:00	1127.43	76.324	3.0391	0.723447	3.42636	0.847975	0.449278	0.121649	0.506528	0.141372	0.087064	0.0239288	0.0981583	0.0277844	0.662653	0.182523	0.747093	0.211906	0.0452341	0.0163078	0.0509981	0.0187072
1211	95.079	SS1	120	3	50.592	-144.87	7	2018-09-04 15:31:00	2018-09-04 15:31:00	1158.34	85.4704	1.98158	0.36056	2.29534	0.450686	0.285699	0.0535806	0.330937	0.0666955	0.0411472	0.00859304	0.0476625	0.0105567	0.606692	0.159274	0.702756	0.191642	0.0452341	0.0163078	0.0523965	0.0192816
1212	110.879	SS1	120	3	50.592	-144.87	6	2018-09-04 15:31:00	2018-09-04 15:31:00	1032.67	95.091	1.50662	0.276199	1.55585	0.319183	0.201054	0.033152	0.207623	0.0392118	0.0184363	0.0042731	0.0190387	0.00474822	0.576157	0.164678	0.594983	0.178666	0.0452341	0.0163078	0.046712	0.0173813
1213	125.754	SS1	120	3	50.592	-144.87	5	2018-09-04 15:31:00	2018-09-04 15:31:00	922.546	106.636	1.35638	0.286931	1.25133	0.301646	0.169817	0.0302747	0.156664	0.0332865	0.0139738	0.00396631	0.0128915	0.00395088	0.55682	0.178201	0.513692	0.174793	0.0452341	0.0163078	0.0417305	0.0157991
1214	145.834	SS1	120	3	50.592	-144.87	4	2018-09-04 15:31:00	2018-09-04 15:31:00	894.859	136.503	1.15358	0.287971	1.03229	0.301996	0.127649	0.0250639	0.114227	0.0284016	0.00948847	0.00344978	0.00849084	0.00334776	0.530716	0.194358	0.474916	0.188407	0.0452341	0.0163078	0.0404781	0.0158457
1215	195.146	SS1	120	3	50.592	-144.87	3	2018-09-04 15:31:00	2018-09-04 15:31:00	1019.67	263.518	1.03544	0.0806074	1.0558	0.284967	0.125806	0.0164619	0.12828	0.0371594	0.00923398	0.00262372	0.0094156	0.0036164	0.534403	0.203876	0.544914	0.251094	0.0452341	0.0163078	0.0461238	0.0204596
1216	331.341	SS1	120	3	50.592	-144.87	2	2018-09-04 15:31:00	2018-09-04 15:31:00	589.843	470.504	0.929464	0.148967	0.548237	0.446056	0.108207	0.0302663	0.0638253	0.0539512	0.00708805	0.000391293	0.00418083	0.00334293	0.521982	0.188324	0.307887	0.269548	0.0452341	0.0163078	0.026681	0.0233556
1217	500.144	SS1	120	3	50.592	-144.87	1	2018-09-04 15:31:00	2018-09-04 15:31:00	-354.986	526.198	0.876803	0.158282	-0.311253	-0.464781	0.120949	0.0504373	-0.0429352	-0.0661136	0.00803236	0.00133428	-0.00285138	-0.00425307	0.802252	0.183303	-0.284788	-0.427129	0.0452341	0.0163078	-0.0160575	-0.024496
1218	6.168	SS9	121	3	50.542	-145.028	13	2018-09-04 18:21:00	2018-09-04 18:21:00	291.805	25.2802	5.30452	1.89986	1.54789	0.570377	0.798586	0.358632	0.233032	0.10658	0.184484	0.077162	0.0538335	0.0229942	0.784293	0.237113	0.228861	0.0719756	0.0452341	0.0163078	0.0131995	0.00489417
1219	20.258	SS9	121	3	50.542	-145.028	12	2018-09-04 18:21:00	2018-09-04 18:21:00	659.347	40.1729	5.30452	1.89986	3.49752	1.27066	0.798586	0.358632	0.526546	0.238629	0.184484	0.077162	0.121639	0.0514135	0.784293	0.237113	0.517121	0.159483	0.0452341	0.0163078	0.0298249	0.010905
1220	35.471	SS9	121	3	50.542	-145.028	11	2018-09-04 18:21:00	2018-09-04 18:21:00	939.691	51.032	5.30452	1.89986	4.98461	1.80569	0.798586	0.358632	0.750424	0.339458	0.184484	0.077162	0.173358	0.073117	0.784293	0.237113	0.736993	0.226379	0.0452341	0.0163078	0.042506	0.0154972
1221	50.126	SS9	121	3	50.542	-145.028	10	2018-09-04 18:21:00	2018-09-04 18:21:00	1250.35	58.418	5.30452	1.89986	6.63251	2.39562	0.798586	0.358632	0.998512	0.450835	0.184484	0.077162	0.23067	0.0970795	0.784293	0.237113	0.98064	0.299993	0.0452341	0.0163078	0.0565584	0.020561
1222	64.863	SS9	121	3	50.542	-145.028	9	2018-09-04 18:21:00	2018-09-04 18:21:00	1425.35	69.1919	4.2085	1.26285	5.99858	1.8234	0.630162	0.228619	0.898201	0.328767	0.137838	0.0479444	0.196468	0.0689998	0.724534	0.209914	1.03272	0.303372	0.0452341	0.0163078	0.0644744	0.0234541
1223	81.279	SS9	121	3	50.542	-145.028	8	2018-09-04 18:21:00	2018-09-04 18:21:00	1529.77	78.8163	2.99864	0.70738	4.58722	1.10763	0.443019	0.118544	0.677716	0.184676	0.0853072	0.0232306	0.1305	0.0361678	0.660512	0.181607	1.01043	0.282652	0.0452341	0.0163078	0.0691975	0.0252006
1224	95.206	SS9	121	3	50.542	-145.028	7	2018-09-04 18:21:00	2018-09-04 18:21:00	1611.69	87.0495	1.97222	0.357878	3.17859	0.601795	0.284252	0.0530997	0.458124	0.0890853	0.0407408	0.00848437	0.0656614	0.0141265	0.606197	0.159075	0.976998	0.261753	0.0452341	0.0163078	0.0729031	0.0265764
1225	109.595	SS9	121	3	50.542	-145.028	6	2018-09-04 18:21:00	2018-09-04 18:21:00	1618.25	94.9112	1.51959	0.274875	2.45908	0.467615	0.203751	0.0333612	0.32972	0.0573458	0.0188215	0.0042778	0.0304579	0.00714933	0.577827	0.163449	0.935069	0.270127	0.0452341	0.0163078	0.0732001	0.0267371
1226	125.729	SS9	121	3	50.542	-145.028	5	2018-09-04 18:21:00	2018-09-04 18:21:00	1738.76	104.679	1.35664	0.28692	2.35886	0.518704	0.169869	0.0302802	0.295361	0.0555717	0.0139813	0.00396721	0.0243101	0.00705158	0.556852	0.17818	0.968232	0.315248	0.0452341	0.0163078	0.0786511	0.028748
1227	146.563	SS9	121	3	50.542	-145.028	4	2018-09-04 18:21:00	2018-09-04 18:21:00	1472.01	139.465	1.14621	0.287718	1.68724	0.452688	0.126118	0.024846	0.185647	0.0405833	0.00948847	0.00344978	0.0139671	0.0052477	0.529768	0.194899	0.779825	0.296255	0.0452341	0.0163078	0.0665851	0.0248204
1228	195.854	SS9	121	3	50.542	-145.028	3	2018-09-04 18:21:00	2018-09-04 18:21:00	1953.93	279.314	1.03416	0.0775926	2.02069	0.326227	0.125834	0.0163142	0.245872	0.0474496	0.00922902	0.00261055	0.0180329	0.00571521	0.534403	0.203876	1.04419	0.425407	0.0452341	0.0163078	0.0883843	0.0342778
1229	330.904	SS9	121	3	50.542	-145.028	2	2018-09-04 18:21:00	2018-09-04 18:21:00	2466.18	425.707	0.929638	0.148946	2.29265	0.539954	0.108172	0.030214	0.266772	0.0875944	0.00708542	0.00038929	0.0174739	0.00316542	0.521982	0.188324	1.2873	0.514863	0.0452341	0.0163078	0.111555	0.0445903
1230	500.172	SS9	121	3	50.542	-145.028	1	2018-09-04 18:21:00	2018-09-04 18:21:00	2825.4	460.843	0.876803	0.158282	2.47732	0.602717	0.120949	0.0504373	0.341729	0.153019	0.00803236	0.00133428	0.0226947	0.00528339	0.802252	0.183303	2.26668	0.636328	0.0452341	0.0163078	0.127804	0.0505723
1231	20.338	LS1	123	3	50.593	-144.87	17	2018-09-06 03:29:00	2018-09-06 03:29:00	667.869	48.806	5.30452	1.89986	3.54273	1.295	0.798586	0.358632	0.533351	0.242669	0.184484	0.077162	0.123211	0.0523147	0.784293	0.237113	0.523805	0.162921	0.0452341	0.0163078	0.0302104	0.011113
1232	35.283	LS1	123	3	50.593	-144.87	16	2018-09-06 03:29:00	2018-09-06 03:29:00	935.352	56.9509	5.30452	1.89986	4.9616	1.80254	0.798586	0.358632	0.74696	0.338516	0.184484	0.077162	0.172558	0.0729344	0.784293	0.237113	0.73359	0.226237	0.0452341	0.0163078	0.0423098	0.0154696
1233	49.702	LS1	123	3	50.593	-144.87	15	2018-09-06 03:29:00	2018-09-06 03:29:00	1171.19	63.9068	5.30452	1.89986	6.21263	2.25078	0.798586	0.358632	0.9353	0.423116	0.184484	0.077162	0.216067	0.0911374	0.784293	0.237113	0.918559	0.282192	0.0452341	0.0163078	0.0529778	0.0193171
1234	64.968	LS1	123	3	50.593	-144.87	14	2018-09-06 03:29:00	2018-09-06 03:29:00	1322.24	74.6595	4.20076	1.2588	5.55443	1.69373	0.628965	0.227802	0.831645	0.304848	0.137502	0.0477611	0.181812	0.0639807	0.724125	0.209727	0.957469	0.282531	0.0452341	0.0163078	0.0598104	0.0218258
1235	79.835	LS1	123	3	50.593	-144.87	13	2018-09-06 03:29:00	2018-09-06 03:29:00	1347.3	83.2157	3.10506	0.750012	4.18344	1.043	0.459481	0.126797	0.619057	0.17506	0.089928	0.0250862	0.12116	0.0346171	0.666143	0.184021	0.897493	0.254052	0.0452341	0.0163078	0.0609437	0.0222916
1236	95.291	LS1	123	3	50.593	-144.87	12	2018-09-06 03:29:00	2018-09-06 03:29:00	1389.19	91.0823	1.96595	0.356088	2.73109	0.526086	0.283283	0.052779	0.393534	0.0777277	0.0404688	0.0084119	0.0562189	0.0122533	0.605865	0.158941	0.841663	0.227592	0.0452341	0.0163078	0.0628388	0.0230263
1237	109.741	LS1	123	3	50.593	-144.87	11	2018-09-06 03:29:00	2018-09-06 03:29:00	1398.99	98.4667	1.51812	0.275029	2.12382	0.412779	0.203444	0.0333377	0.284615	0.0507592	0.0187777	0.00427744	0.0262697	0.00626321	0.577637	0.163589	0.808105	0.235821	0.0452341	0.0163078	0.0632818	0.0232451
1238	125.106	LS1	123	3	50.593	-144.87	10	2018-09-06 03:29:00	2018-09-06 03:29:00	1306.37	149.085	1.36293	0.286641	1.78049	0.426036	0.171177	0.0304174	0.223621	0.0472256	0.0141682	0.00398935	0.0185089	0.00562337	0.557662	0.17764	0.728514	0.246507	0.0452341	0.0163078	0.0590925	0.022346
1240	195.199	LS1	123	3	50.593	-144.87	8	2018-09-06 03:29:00	2018-09-06 03:29:00	1654.45	209.506	1.03534	0.0803814	1.71292	0.254432	0.125808	0.0164509	0.208143	0.0378878	0.00923361	0.00262273	0.0152765	0.00475086	0.534403	0.203876	0.884142	0.355399	0.0452341	0.0163078	0.0748374	0.0285964
1242	251.047	LS1	123	3	50.593	-144.87	6	2018-09-06 03:29:00	2018-09-06 03:29:00	1824.42	231.25	0.985567	0.0967942	1.79809	0.288321	0.130395	0.0220175	0.237896	0.0502277	0.00727906	0.00143925	0.0132801	0.00311902	0.528395	0.191908	0.964016	0.370831	0.0452341	0.0163078	0.082526	0.0315376
1243	275.696	LS1	123	3	50.593	-144.87	5	2018-09-06 03:29:00	2018-09-06 03:29:00	1849.01	239.008	0.968313	0.113741	1.79042	0.312716	0.12793	0.02507	0.236545	0.0555308	0.00678608	0.00107414	0.0125476	0.00256423	0.52593	0.18842	0.972453	0.370375	0.0452341	0.0163078	0.0836384	0.032033
1244	300.428	LS1	123	3	50.593	-144.87	4	2018-09-06 03:29:00	2018-09-06 03:29:00	1803.89	250.152	0.951	0.130076	1.7155	0.334142	0.125457	0.0279984	0.22631	0.0594623	0.00702652	0.000427261	0.012675	0.00191925	0.523457	0.184945	0.944257	0.358397	0.0452341	0.0163078	0.0815971	0.0315186
1245	330.988	LS1	123	3	50.593	-144.87	3	2018-09-06 03:29:00	2018-09-06 03:29:00	1716.62	363.044	0.929605	0.14895	1.59578	0.42341	0.108179	0.0302241	0.185703	0.0650715	0.00708593	0.000389675	0.0121639	0.00265805	0.521982	0.188324	0.896046	0.37473	0.0452341	0.0163078	0.0776498	0.0324556
1246	500.878	LS1	123	3	50.593	-144.87	2	2018-09-06 03:29:00	2018-09-06 03:29:00	884.413	658.005	0.876803	0.158282	0.775455	0.59368	0.120949	0.0504373	0.106969	0.0912336	0.00803236	0.00133428	0.00710392	0.00541547	0.802252	0.183303	0.709521	0.552218	0.0452341	0.0163078	0.0400056	0.0330746
1247	752.782	LS1	123	3	50.593	-144.87	1	2018-09-06 03:29:00	2018-09-06 03:29:00	611.674	735.216	0.876803	0.158282	0.536317	0.651869	0.120949	0.0504373	0.0739812	0.0941232	0.00803236	0.00133428	0.00491319	0.00596165	0.802252	0.183303	0.490716	0.600391	0.0452341	0.0163078	0.0276685	0.0347206
1248	4.753	LS12	127	3	50.863	-144.87	24	2018-09-06 15:44:00	2018-09-06 15:44:00	309.427	28.1582	5.30452	1.89986	1.64136	0.606547	0.798586	0.358632	0.247104	0.113226	0.184484	0.077162	0.0570844	0.0244346	0.784293	0.237113	0.242681	0.0766208	0.0452341	0.0163078	0.0139966	0.00520434
1249	25.308	LS12	127	3	50.863	-144.87	20	2018-09-06 15:44:00	2018-09-06 15:44:00	708.158	38.5477	5.30452	1.89986	3.75644	1.36085	0.798586	0.358632	0.565526	0.255827	0.184484	0.077162	0.130644	0.0551037	0.784293	0.237113	0.555404	0.170614	0.0452341	0.0163078	0.0320329	0.0116794
1250	36.066	LS12	127	3	50.863	-144.87	17	2018-09-06 15:44:00	2018-09-06 15:44:00	983.204	47.6772	5.30452	1.89986	5.21543	1.88499	0.798586	0.358632	0.785173	0.354658	0.184484	0.077162	0.181386	0.0763741	0.784293	0.237113	0.77112	0.23611	0.0452341	0.0163078	0.0444743	0.0161783
1251	54.705	LS12	127	3	50.863	-144.87	14	2018-09-06 15:44:00	2018-09-06 15:44:00	1230.09	63.0803	4.95714	1.68433	6.09772	2.09534	0.745963	0.314581	0.9176	0.389813	0.170344	0.0672104	0.209538	0.0833701	0.764151	0.228378	0.939973	0.285031	0.0452341	0.0163078	0.0556419	0.020262
1252	75.358	LS12	127	3	50.863	-144.87	11	2018-09-06 15:44:00	2018-09-06 15:44:00	1347.24	79.7549	3.43502	0.889826	4.62778	1.22971	0.510519	0.154138	0.687789	0.211614	0.104254	0.0312297	0.140455	0.0428876	0.683604	0.191599	0.920976	0.263824	0.0452341	0.0163078	0.0609409	0.0222647
1253	96.024	LS12	127	3	50.863	-144.87	10	2018-09-06 15:44:00	2018-09-06 15:44:00	1327.19	90.7452	1.91193	0.340825	2.5375	0.484472	0.274926	0.0500533	0.36488	0.0709606	0.0381232	0.0077958	0.0505968	0.0109096	0.603006	0.157794	0.800305	0.216453	0.0452341	0.0163078	0.0600343	0.0220294
1254	110.911	LS12	127	3	50.863	-144.87	7	2018-09-06 15:44:00	2018-09-06 15:44:00	1464.3	97.4935	1.5063	0.276231	2.20567	0.430319	0.200987	0.0331467	0.294305	0.0523428	0.0184267	0.00427294	0.0269822	0.00650966	0.576116	0.164709	0.843605	0.247637	0.0452341	0.0163078	0.0662361	0.0242833
1255	125.724	LS12	127	3	50.863	-144.87	6	2018-09-06 15:44:00	2018-09-06 15:44:00	1395.36	109.832	1.35669	0.286918	1.89307	0.427185	0.16988	0.0302813	0.237043	0.0461895	0.0139828	0.0039674	0.0195111	0.00574502	0.556859	0.178175	0.777019	0.256031	0.0452341	0.0163078	0.0631179	0.0232913
1256	150.502	LS12	127	3	50.863	-144.87	5	2018-09-06 15:44:00	2018-09-06 15:44:00	1104.06	145.688	1.1158	0.285221	1.2319	0.354383	0.12402	0.0256407	0.136925	0.0335835	0.00948847	0.00344978	0.0104758	0.00405185	0.526488	0.194504	0.581274	0.228031	0.0452341	0.0163078	0.0499411	0.0191729
1257	195.787	LS12	127	3	50.863	-144.87	3	2018-09-06 15:44:00	2018-09-06 15:44:00	1259.63	260.053	1.03428	0.0778776	1.30281	0.286298	0.125831	0.0163282	0.158501	0.0386497	0.00922949	0.00261179	0.0116257	0.00407236	0.534403	0.203876	0.673149	0.292	0.0452341	0.0163078	0.0569781	0.0236715
1258	331.13	LS12	127	3	50.863	-144.87	2	2018-09-06 15:44:00	2018-09-06 15:44:00	1314.93	324.494	0.929548	0.148957	1.22229	0.359648	0.10819	0.0302411	0.142263	0.0530449	0.00708678	0.000390326	0.00931865	0.0023562	0.521982	0.188324	0.686371	0.30002	0.0452341	0.0163078	0.0594798	0.0259862
1275	5.59	LS18	128	3	50.593	-144.45	17	2018-09-06 19:01:00	2018-09-06 19:01:00	262.223	25.9273	5.30452	1.89986	1.39097	0.516822	0.798586	0.358632	0.209408	0.0962938	0.184484	0.077162	0.0483761	0.0207913	0.784293	0.237113	0.20566	0.0654172	0.0452341	0.0163078	0.0118614	0.00443419
1274	20.757	LS18	128	3	50.593	-144.45	16	2018-09-06 19:01:00	2018-09-06 19:01:00	575.922	36.9893	5.30452	1.89986	3.05499	1.11162	0.798586	0.358632	0.459923	0.208645	0.184484	0.077162	0.106249	0.0449601	0.784293	0.237113	0.451692	0.139606	0.0452341	0.0163078	0.0260513	0.0095399
1273	35.86	LS18	128	3	50.593	-144.45	15	2018-09-06 19:01:00	2018-09-06 19:01:00	935.458	45.5533	5.30452	1.89986	4.96216	1.79359	0.798586	0.358632	0.747044	0.337452	0.184484	0.077162	0.172577	0.0726694	0.784293	0.237113	0.733673	0.224668	0.0452341	0.0163078	0.0423146	0.0153938
1272	50.243	LS18	128	3	50.593	-144.45	14	2018-09-06 19:01:00	2018-09-06 19:01:00	1237.72	59.3953	5.30452	1.89986	6.56551	2.37251	0.798586	0.358632	0.988425	0.446412	0.184484	0.077162	0.22834	0.0961313	0.784293	0.237113	0.970734	0.297153	0.0452341	0.0163078	0.055987	0.0203625
1259	65.437	LS18	128	3	50.593	-144.45	13	2018-09-06 19:01:00	2018-09-06 19:01:00	1302.9	68.4897	4.16619	1.2408	5.42812	1.64163	0.623618	0.224169	0.81251	0.295176	0.136002	0.0469464	0.177196	0.0618714	0.722296	0.208893	0.941076	0.276625	0.0452341	0.0163078	0.0589353	0.0214721
1260	80.459	LS18	128	3	50.593	-144.45	12	2018-09-06 19:01:00	2018-09-06 19:01:00	1479.72	76.5157	3.05907	0.731442	4.52658	1.10735	0.452367	0.123197	0.669378	0.185554	0.0879312	0.0242768	0.130114	0.0365476	0.66371	0.182976	0.982107	0.275476	0.0452341	0.0163078	0.0669339	0.024378
1261	95.45	LS18	128	3	50.593	-144.45	11	2018-09-06 19:01:00	2018-09-06 19:01:00	1454.7	85.1891	1.95423	0.352751	2.84282	0.539476	0.28147	0.0521817	0.409453	0.0796057	0.03996	0.00827691	0.0581297	0.0125124	0.605245	0.158692	0.880448	0.236537	0.0452341	0.0163078	0.0658018	0.0240339
1262	110.623	LS18	128	3	50.593	-144.45	10	2018-09-06 19:01:00	2018-09-06 19:01:00	1408.06	94.0331	1.50921	0.27594	2.12505	0.413646	0.201592	0.0331942	0.283852	0.0504372	0.0185131	0.00427431	0.0260675	0.00626519	0.57649	0.164434	0.811731	0.237794	0.0452341	0.0163078	0.0636921	0.023353
1263	125.223	LS18	128	3	50.593	-144.45	9	2018-09-06 19:01:00	2018-09-06 19:01:00	1306.96	104.05	1.36175	0.286694	1.77975	0.400593	0.170932	0.0303918	0.223401	0.0435209	0.0141331	0.00398526	0.0184714	0.00541218	0.55751	0.177741	0.728643	0.239434	0.0452341	0.0163078	0.0591191	0.0218271
1264	144.997	LS18	128	3	50.593	-144.45	8	2018-09-06 19:01:00	2018-09-06 19:01:00	1010.39	139.624	1.16203	0.288236	1.1741	0.333376	0.129406	0.0253115	0.130751	0.0313132	0.00948847	0.00344978	0.00958705	0.0037289	0.531804	0.193732	0.537329	0.209355	0.0452341	0.0163078	0.045704	0.0176462
1265	194.688	LS18	128	3	50.593	-144.45	7	2018-09-06 19:01:00	2018-09-06 19:01:00	964.722	170.206	1.03626	0.0825614	0.999704	0.193528	0.125788	0.0165575	0.12135	0.0267119	0.00923718	0.00263224	0.00891131	0.00298669	0.534403	0.203876	0.51555	0.216698	0.0452341	0.0163078	0.0436383	0.0175154
1266	220.604	LS18	128	3	50.593	-144.45	6	2018-09-06 19:01:00	2018-09-06 19:01:00	1010.83	187.679	1.00688	0.0749476	1.01778	0.20359	0.13344	0.018063	0.134884	0.030993	0.00788792	0.00194385	0.00797332	0.00246016	0.53144	0.19625	0.537194	0.222037	0.0452341	0.0163078	0.0457238	0.018542
1267	250.686	LS18	128	3	50.593	-144.45	5	2018-09-06 19:01:00	2018-09-06 19:01:00	969.152	204.24	0.98582	0.0965411	0.955409	0.222021	0.130431	0.0219718	0.126408	0.0341041	0.00728628	0.00144489	0.00706151	0.0020434	0.528431	0.191959	0.51213	0.215078	0.0452341	0.0163078	0.0438387	0.0183069
1268	275.511	LS18	128	3	50.593	-144.45	4	2018-09-06 19:01:00	2018-09-06 19:01:00	965.588	213.328	0.968442	0.113616	0.935116	0.233917	0.127949	0.0250475	0.123546	0.0364686	0.00678978	0.00107674	0.00655613	0.00178296	0.525949	0.188446	0.50785	0.213773	0.0452341	0.0163078	0.0436774	0.0184681
1269	300.819	LS18	128	3	50.593	-144.45	3	2018-09-06 19:01:00	2018-09-06 19:01:00	1126.78	223.889	0.950727	0.130329	1.07126	0.258599	0.125418	0.0280436	0.141318	0.0422725	0.00702652	0.000427261	0.00791734	0.00164518	0.523418	0.18489	0.589776	0.239028	0.0452341	0.0163078	0.0509688	0.0209813
1270	330.851	LS18	128	3	50.593	-144.45	2	2018-09-06 19:01:00	2018-09-06 19:01:00	991.113	337.95	0.92966	0.148944	0.921397	0.347131	0.108168	0.0302077	0.107207	0.047251	0.00708511	0.000389047	0.00702214	0.00242526	0.521982	0.188324	0.517343	0.256821	0.0452341	0.0163078	0.044832	0.022247
1271	499.838	LS18	128	3	50.593	-144.45	1	2018-09-06 19:01:00	2018-09-06 19:01:00	1564.57	387.845	0.876803	0.158282	1.37182	0.420678	0.120949	0.0504373	0.189233	0.0918027	0.00803236	0.00133428	0.0125672	0.00375009	0.802252	0.183303	1.25518	0.423159	0.0452341	0.0163078	0.0707721	0.0309643
1276	5.858	LS3	140	3	50.593	-145.291	24	2018-09-08 14:53:00	2018-09-08 14:53:00	317.459	39.2396	5.30452	1.89986	1.68397	0.638034	0.798586	0.358632	0.253518	0.118085	0.184484	0.077162	0.0585662	0.025543	0.784293	0.237113	0.248981	0.0813218	0.0452341	0.0163078	0.0143599	0.00547288
1277	26.027	LS3	140	3	50.593	-145.291	20	2018-09-08 14:53:00	2018-09-08 14:53:00	558.589	51.8074	5.30452	1.89986	2.96305	1.09625	0.798586	0.358632	0.446082	0.204555	0.184484	0.077162	0.103051	0.0441488	0.784293	0.237113	0.438097	0.138541	0.0452341	0.0163078	0.0252672	0.00940597
1278	32.781	LS3	140	3	50.593	-145.291	17	2018-09-08 14:53:00	2018-09-08 14:53:00	850.035	59.7716	5.30452	1.89986	4.50903	1.64578	0.798586	0.358632	0.678826	0.308564	0.184484	0.077162	0.156818	0.0665108	0.784293	0.237113	0.666676	0.206934	0.0452341	0.0163078	0.0384505	0.0141234
1279	50.049	LS3	140	3	50.593	-145.291	14	2018-09-08 14:53:00	2018-09-08 14:53:00	1123.82	84.6733	5.30452	1.89986	5.96136	2.18184	0.798586	0.358632	0.897471	0.408672	0.184484	0.077162	0.207328	0.0881123	0.784293	0.237113	0.881408	0.274624	0.0452341	0.0163078	0.0508351	0.0187231
1280	75.711	LS3	140	3	50.593	-145.291	11	2018-09-08 14:53:00	2018-09-08 14:53:00	1100.39	120.605	3.409	0.878382	3.75122	1.05037	0.506495	0.151886	0.557341	0.177947	0.103125	0.0307239	0.113477	0.0360234	0.682227	0.190996	0.750715	0.225702	0.0452341	0.0163078	0.049775	0.0187559
1281	95.467	LS3	140	3	50.593	-145.291	10	2018-09-08 14:53:00	2018-09-08 14:53:00	1086.75	134.384	1.95298	0.352395	2.12241	0.464267	0.281276	0.0521181	0.305678	0.0680941	0.0399056	0.00826253	0.0433676	0.0104588	0.605179	0.158666	0.657681	0.190647	0.0452341	0.0163078	0.0491583	0.0187361
1282	110.759	LS3	140	3	50.593	-145.291	7	2018-09-08 14:53:00	2018-09-08 14:53:00	924.045	145.648	1.50783	0.276078	1.39331	0.336616	0.201306	0.0331718	0.186016	0.0424171	0.0184723	0.00427369	0.0170692	0.00477846	0.576313	0.164564	0.532539	0.173693	0.0452341	0.0163078	0.0417983	0.0164464
1283	125.518	LS3	140	3	50.593	-145.291	6	2018-09-08 14:53:00	2018-09-08 14:53:00	763.521	163.173	1.35877	0.286827	1.03745	0.311637	0.170312	0.0303268	0.130037	0.0361728	0.0140446	0.0039748	0.0107233	0.00380292	0.557127	0.177997	0.425378	0.163506	0.0452341	0.0163078	0.0345371	0.0144746
1284	150.555	LS3	140	3	50.593	-145.291	5	2018-09-08 14:53:00	2018-09-08 14:53:00	838.134	200.29	1.1157	0.284961	0.935106	0.327076	0.124022	0.02563	0.103947	0.0328405	0.00948847	0.00344978	0.00795261	0.00346002	0.526488	0.194504	0.441267	0.194153	0.0452341	0.0163078	0.0379122	0.0163982
1285	195.501	LS3	140	3	50.593	-145.291	3	2018-09-08 14:53:00	2018-09-08 14:53:00	84.7749	385.326	1.0348	0.0790948	0.0877249	0.398791	0.12582	0.0163878	0.0106664	0.0485017	0.00923149	0.00261711	0.000782599	0.00356405	0.534403	0.203876	0.045304	0.206644	0.0452341	0.0163078	0.00383471	0.0174846
1286	330.687	LS3	140	3	50.593	-145.291	2	2018-09-08 14:53:00	2018-09-08 14:53:00	-143.902	454.622	0.929725	0.148936	-0.13379	-0.423217	0.108155	0.030188	-0.0155637	-0.0493612	0.00708412	0.000388296	-0.00101942	-0.00322108	0.521982	0.188324	-0.0751144	-0.238847	0.0452341	0.0163078	-0.00650928	-0.0206979
1292	5.629	LS9	141	3	50.323	-144.869	12	2018-09-08 19:11:00	2018-09-08 19:11:00	208.103	22.5977	5.30452	1.89986	1.10388	0.413138	0.798586	0.358632	0.166188	0.076783	0.184484	0.077162	0.0383917	0.0165899	0.784293	0.237113	0.163213	0.0524302	0.0452341	0.0163078	0.00941332	0.0035443
1293	15.265	LS9	141	3	50.323	-144.869	11	2018-09-08 19:11:00	2018-09-08 19:11:00	411.078	30.9216	5.30452	1.89986	2.18058	0.79803	0.798586	0.358632	0.328282	0.14948	0.184484	0.077162	0.0758376	0.0322285	0.784293	0.237113	0.322406	0.100444	0.0452341	0.0163078	0.0185947	0.00684815
1294	25.21	LS9	141	3	50.323	-144.869	10	2018-09-08 19:11:00	2018-09-08 19:11:00	713.614	47.8004	5.30452	1.89986	3.78538	1.37927	0.798586	0.358632	0.569883	0.258756	0.184484	0.077162	0.131651	0.0557655	0.784293	0.237113	0.559683	0.173311	0.0452341	0.0163078	0.0322797	0.0118367
1295	50.025	LS9	141	3	50.323	-144.869	9	2018-09-08 19:11:00	2018-09-08 19:11:00	1107.31	74.5888	5.30452	1.89986	5.87377	2.14062	0.798586	0.358632	0.884285	0.40156	0.184484	0.077162	0.204282	0.0865434	0.784293	0.237113	0.868457	0.268996	0.0452341	0.0163078	0.0500882	0.0183703
1296	75.004	LS9	141	3	50.323	-144.869	8	2018-09-08 19:11:00	2018-09-08 19:11:00	1234.99	95.5144	3.46111	0.901373	4.27442	1.16123	0.514554	0.156413	0.635468	0.199322	0.105387	0.0317407	0.130152	0.0404711	0.684984	0.192204	0.845946	0.246221	0.0452341	0.0163078	0.0558634	0.0205981
1297	95.09	LS9	141	3	50.323	-144.869	7	2018-09-08 19:11:00	2018-09-08 19:11:00	1194.28	105.033	1.98077	0.360328	2.36558	0.477983	0.285574	0.0535388	0.341054	0.070626	0.041112	0.00858361	0.0490991	0.0111235	0.606649	0.159257	0.724507	0.200586	0.0452341	0.0163078	0.054022	0.0200472
1298	109.704	LS9	141	3	50.323	-144.869	6	2018-09-08 19:11:00	2018-09-08 19:11:00	1187.91	111.391	1.51849	0.27499	1.80382	0.367857	0.203522	0.0333437	0.241765	0.0456381	0.0187888	0.00427753	0.0223193	0.00549544	0.577685	0.163554	0.686235	0.204665	0.0452341	0.0163078	0.0537338	0.0200167
1299	124.891	LS9	141	3	50.323	-144.869	5	2018-09-08 19:11:00	2018-09-08 19:11:00	1120.14	124.405	1.3651	0.28654	1.5291	0.363123	0.171629	0.0304645	0.192248	0.0402536	0.0142327	0.00399681	0.0159426	0.00481438	0.557942	0.177453	0.62497	0.210542	0.0452341	0.0163078	0.0506683	0.0191141
1300	150.736	LS9	141	3	50.323	-144.869	4	2018-09-08 19:11:00	2018-09-08 19:11:00	1210.72	152.853	1.11538	0.284074	1.35041	0.383871	0.124029	0.0255933	0.150165	0.0363259	0.00948847	0.00344978	0.0114879	0.00442136	0.526488	0.194504	0.63743	0.248861	0.0452341	0.0163078	0.0547658	0.0209198
1301	195.683	LS9	141	3	50.323	-144.869	3	2018-09-08 19:11:00	2018-09-08 19:11:00	739.457	319.232	1.03447	0.0783201	0.764947	0.335276	0.125827	0.0163499	0.0930439	0.0419481	0.00923022	0.00261373	0.00682535	0.00352389	0.534403	0.203876	0.395168	0.227666	0.0452341	0.0163078	0.0334486	0.0188132
1302	330.009	LS9	141	3	50.323	-144.869	2	2018-09-08 19:11:00	2018-09-08 19:11:00	1660.63	477.018	0.939781	0.150368	1.56062	0.513146	0.10761	0.0289389	0.178699	0.0703164	0.00702652	0.000427261	0.0116684	0.00342605	0.521982	0.188324	0.866816	0.399753	0.0452341	0.0163078	0.0751168	0.0346263
1303	499.466	LS9	141	3	50.323	-144.869	1	2018-09-08 19:11:00	2018-09-08 19:11:00	1908.75	519.225	0.876803	0.158282	1.6736	0.546385	0.120949	0.0504373	0.230861	0.114944	0.00803236	0.00133428	0.0153318	0.00488673	0.802252	0.183303	1.5313	0.543994	0.0452341	0.0163078	0.0863406	0.0389942
aInternal sample identification code
bSteady-state (SS) 234Th fluxes for all stations integrated down to each sampling depth ("Bottle depth" column)
cAverage element/234Th ratio from 5–51 μm in situ pump particle data for POC, PN, TPP and bSi. A single value of PIC/234Th was used combining all particle size classes and depths. Element/234Th ratios were measured at 50, 100, 150, 200, 330 and 500 m (Table 2) combining all casts (n = 12). All other values were interpolated linearly. Shallowest pump value at 50 m was used for the 0–50 m layer
dFluxes were calculated by multiplying the element/234Th ratio by the SS 234Th flux at each sampling depth
